# Supplementary material for: ASPP2 Is Phosphorylated by CDK1 during Mitosis and Required for Pancreatic Cancer Cell Proliferation
Source: MDPI journal article supplement (doi:10.3390/cancers15225424), 2023-11-15

**Figure 1A**

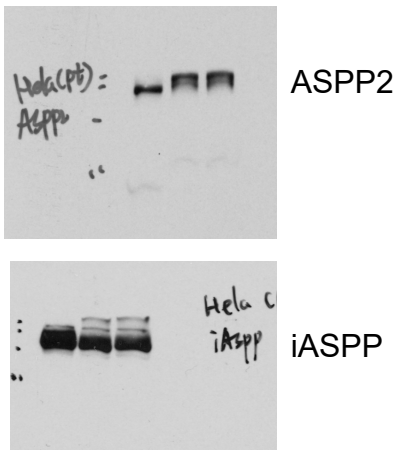

**Figure 1B**

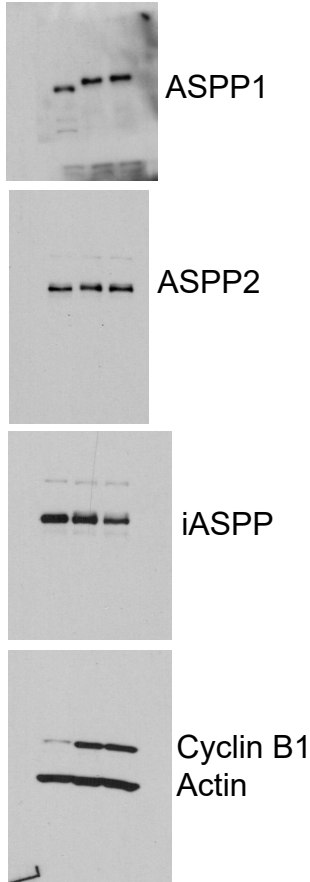

**Figure 1C**

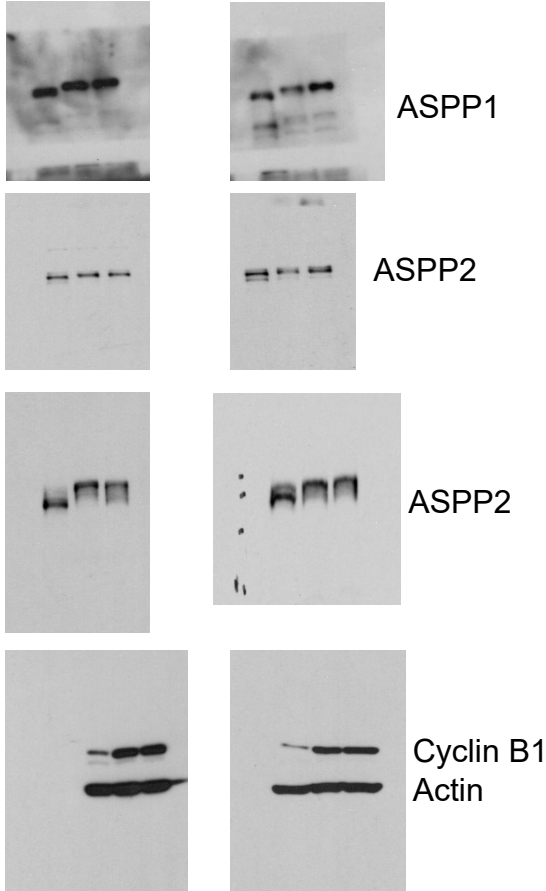

**Figure 1D**

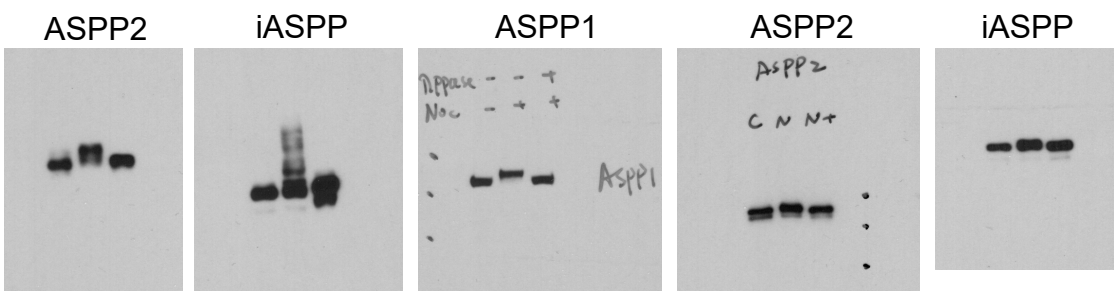

**Figure 1E**

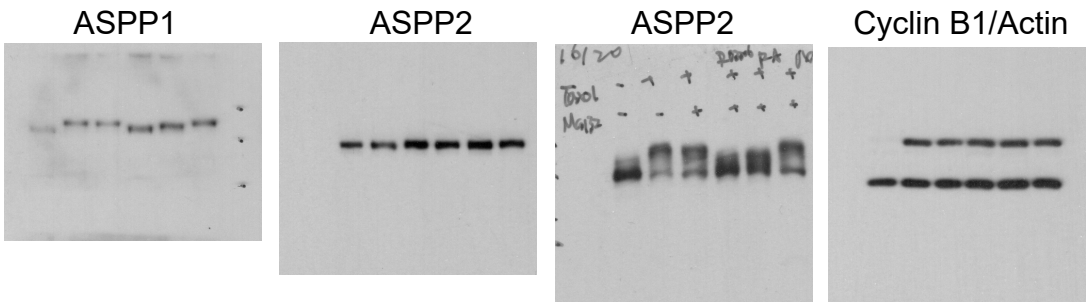

# Figure 2B

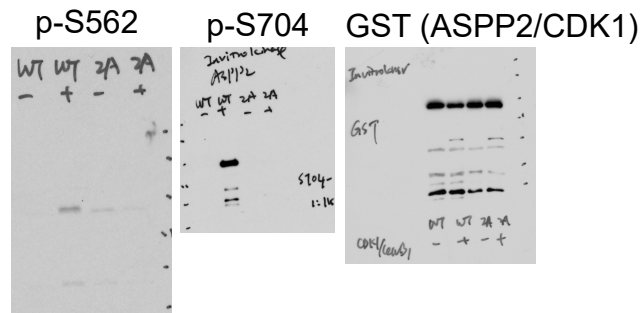

# Figure 2C

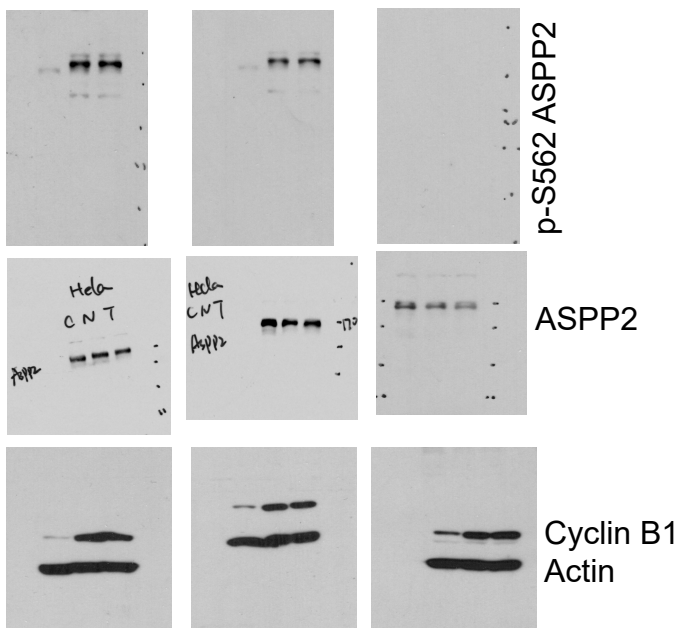

# Figure 2D

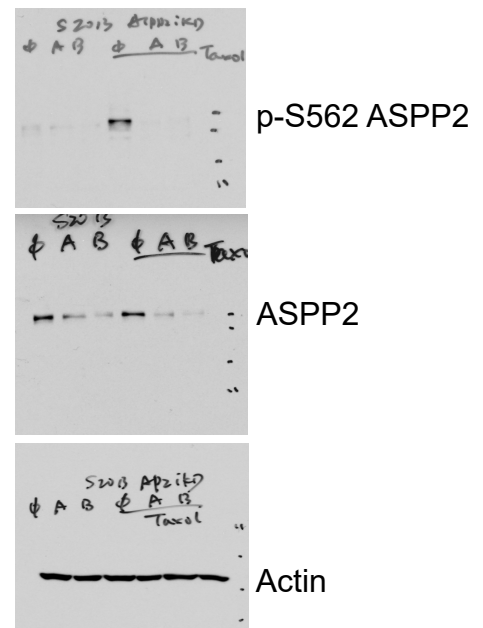

# Figure 2E

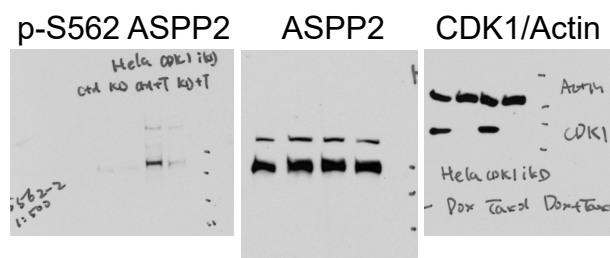

# Figure 2F

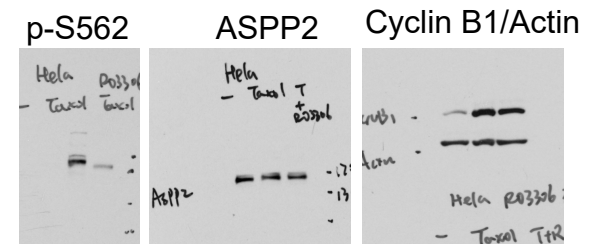

Figure 3C

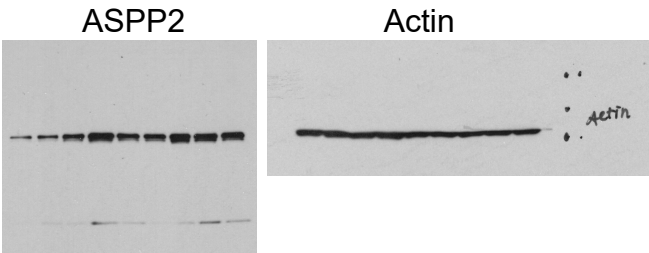

Figure 4A

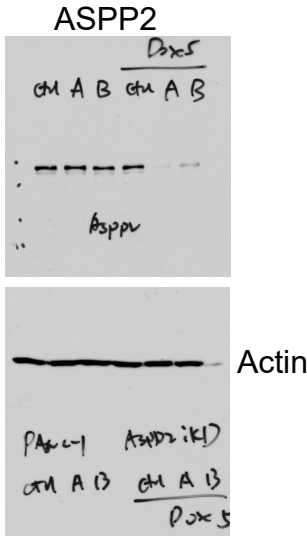

Figure 4B

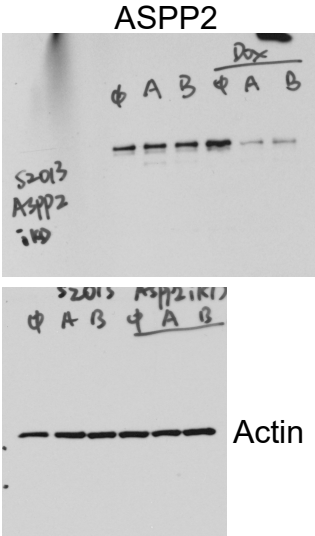

Figure 4H

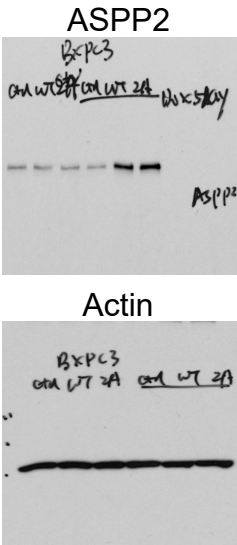

Figure 4I

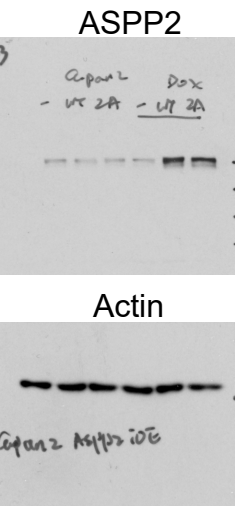

Figure 6D

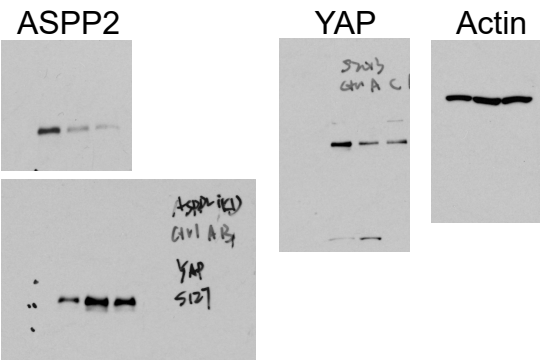

Supplement: s1 [file s1]
