# Supplementary material for: ASPP2 Is Phosphorylated by CDK1 during Mitosis and Required for Pancreatic Cancer Cell Proliferation
Source: Cancers (Basel). 2023 Nov 15;15(22):5424. doi: 10.3390/cancers15225424 (PMC10670399; doi:10.3390/cancers15225424)
Supplement: Supplementary file 1 [file cancers-15-05424-s001.zip › cancers-2664200-supplementary.csv]

ID	log2FoldChange	pvalue	padj	S2013ctrl1	S2013ctrl2	S2013ctrl3	S2013KD1	S2013KD2	S2013KD3	Gene.name
ENSG00000170373	4.18294801	0	0	262.3260582	207.4724478	216.1514446	4102.42501	4418.493137	3921.918605	CST1
ENSG00000171314	-2.704941026	0	0	14256.61823	13343.0718	14000.90395	2056.665441	2289.237523	2040.140831	PGAM1
ENSG00000142871	-2.862085469	1.56E-288	9.44E-285	11708.30795	11472.82738	10756.59312	1465.93078	1748.291502	1460.655903	CYR61
ENSG00000164761	2.92265237	1.06E-284	4.83E-281	665.9869723	649.3488632	738.1775751	4953.991744	5584.404455	5037.53768	TNFRSF11B
ENSG00000109321	-2.656716344	1.35E-277	4.91E-274	15101.4152	14415.34527	14283.32824	2207.529985	2582.729513	2163.115495	AREG
ENSG00000135919	2.599934595	6.36E-264	1.92E-260	1825.575222	1692.695885	1675.173696	9950.698148	11463.45185	10073.30594	SERPINE2
ENSG00000138623	-2.65656922	3.03E-261	7.85E-258	6657.728286	6886.489327	6522.267883	1087.860598	1148.647083	951.06305	SEMA7A
ENSG00000134531	-2.617045804	2.75E-254	6.23E-251	20858.66914	20504.86111	20161.22012	3125.440764	3783.1693	3128.333902	EMP1
ENSG00000185022	-2.738977174	2.26E-243	4.55E-240	2697.140166	2626.3219	2498.996183	396.2466337	393.6245514	382.1946396	MAFF
ENSG00000108602	3.016875791	7.14E-238	1.30E-234	448.6310955	469.8053987	370.1083698	3471.702158	3655.413963	3305.275865	ALDH3A1
ENSG00000214049	-2.635121926	1.01E-224	1.67E-221	8938.358914	8244.037411	8575.706607	1362.325009	1558.38492	1232.400771	UCA1
ENSG00000108064	-2.096828876	4.58E-217	6.93E-214	8744.558847	8097.410248	8536.962481	1886.715623	2097.029043	1953.439269	TFAM
ENSG00000103187	-1.845545752	3.15E-207	4.39E-204	38658.29523	38029.30071	37407.45449	10482.35934	11256.28103	10014.91509	COTL1
ENSG00000166147	2.408090128	3.44E-207	4.45E-204	2295.620689	2339.052357	2147.240294	11728.35506	13304.97022	10970.40169	FBN1
ENSG00000181885	-1.982871948	5.65E-205	6.83E-202	5711.213039	5849.127087	5647.466282	1424.124943	1523.856451	1409.342734	CLDN7
ENSG00000122861	-2.525911349	4.54E-204	5.15E-201	159458.9097	155210.3377	148651.019	25564.26963	30821.26276	24069.4152	PLAU
ENSG00000138166	-2.325422243	5.47E-194	5.84E-191	4865.345341	4861.638033	5023.481923	958.8077948	1093.401532	897.0957513	DUSP5
ENSG00000176658	-2.119005267	1.85E-192	1.87E-189	5335.390809	5661.603913	5267.162089	1236.907496	1336.251767	1175.779343	MYO1D
ENSG00000110092	-2.247103391	3.74E-192	3.57E-189	25194.00878	24680.24412	23342.31686	4990.344646	5751.292057	4688.962014	CCND1
ENSG00000099810	-2.035094147	3.11E-190	2.82E-187	36252.39053	34213.00462	34374.19719	8221.208827	9380.234193	7986.27549	MTAP
ENSG00000123933	2.686216417	2.39E-179	2.06E-176	314.7912699	342.1300462	292.6201161	1985.777281	2177.595472	1953.439269	MXD4
ENSG00000129250	-1.965109867	2.99E-167	2.47E-164	6747.668649	6934.367584	6265.333147	1665.871742	1825.405084	1622.557799	KIF1C
ENSG00000188404	2.175446538	3.29E-159	2.59E-156	918.6765631	944.5981159	988.9948174	4130.59851	4732.702209	4028.968493	SELL
ENSG00000175592	-2.15305948	7.91E-159	5.98E-156	23718.55854	23716.69419	22027.05571	5067.594563	5896.311629	4661.53601	FOSL1
ENSG00000134954	-2.290427914	1.70E-158	1.23E-155	25712.23658	25614.8676	23740.97353	4849.47715	5922.783455	4581.027416	ETS1
ENSG00000139289	-1.856465618	3.52E-156	2.45E-153	37128.23835	37257.26381	34588.30947	9821.645345	10986.95897	9292.107176	PHLDA1
ENSG00000023445	-2.071564542	8.08E-154	5.43E-151	10846.37947	10020.52025	10850.39469	2290.232837	2822.126901	2440.029667	BIRC3
ENSG00000101856	-1.66253899	7.10E-151	4.60E-148	6781.931644	6536.379571	6859.74962	2062.118376	2239.746717	2076.413933	PGRMC1
ENSG00000128342	-1.900474859	5.89E-149	3.69E-146	5853.618613	5953.860775	5645.427118	1479.563118	1717.215879	1484.543068	LIF
ENSG00000123689	-2.508213552	8.46E-149	5.11E-146	1506.501077	1500.185392	1455.963504	249.9262024	288.8881942	248.6034577	G0S2
ENSG00000107984	-2.186797638	4.45E-147	2.60E-144	19802.9406	18153.83919	19469.94333	3890.669355	4869.665138	3860.873628	DKK1
ENSG00000113070	-2.792404706	3.10E-142	1.76E-139	1844.848156	1899.170869	1779.171089	256.2879603	323.4166636	222.9468731	HBEGF
ENSG00000152377	3.336699655	4.27E-141	2.35E-138	110.2840163	98.74890547	87.6840766	951.5372144	1112.967664	933.3688537	SPOCK1
ENSG00000120738	-2.035334482	2.01E-140	1.07E-137	2622.189864	2867.708113	2653.97269	659.8051745	706.6826742	623.7204188	EGR1
ENSG00000100906	-1.961141041	1.30E-139	6.74E-137	3241.065217	3285.6454	3167.842163	865.1990717	875.8721744	752.0033418	NFKBIA
ENSG00000103175	2.012799584	2.83E-138	1.42E-135	1424.055745	1448.31728	1706.780747	6249.972706	6453.370935	5781.578634	WFDC1
ENSG00000248144	2.286647385	6.85E-136	3.36E-133	359.7614513	369.0615659	321.1684201	1639.515888	1781.669022	1703.951102	ADH1C
ENSG00000135378	-2.147730198	2.21E-135	1.05E-132	1793.453663	1862.264712	1795.484406	413.5142622	436.2096637	383.0793494	PRRG4
ENSG00000272398	1.397972412	7.04E-134	3.27E-131	10080.81567	9611.560132	9185.416815	25008.07023	25730.61541	25361.97624	CD24
ENSG00000142627	-1.7193522	1.83E-132	8.29E-130	23578.2944	25387.44588	22885.54399	7202.418743	7890.906212	6733.526394	EPHA2
ENSG00000135480	-1.781403578	3.50E-132	1.55E-129	22104.9856	21794.58166	21746.67058	6352.669655	7041.505864	5709.917139	KRT7
ENSG00000134248	-2.087772256	4.09E-131	1.77E-128	2585.785431	2729.06066	2985.336933	610.7287565	702.0788783	643.1840347	LAMTOR5
ENSG00000198355	-1.689444745	4.81E-130	2.03E-127	5666.242858	5715.466953	5566.919282	1723.127563	1900.216767	1637.597866	PIM3
ENSG00000188910	-1.748444989	1.16E-129	4.78E-127	5366.441648	4984.326067	4938.856593	1470.474893	1636.649451	1448.269965	GJB3
ENSG00000161011	-1.464265192	5.37E-128	2.16E-125	10126.85657	9896.834748	10078.5709	3530.775624	3862.584779	3522.029769	SQSTM1
ENSG00000153246	2.363149085	5.59E-127	2.20E-124	350.1249838	386.0184486	387.4412687	1771.295158	2143.067002	1873.815386	PLA2R1
ENSG00000177606	-1.922820824	4.97E-126	1.92E-123	7667.41593	7581.72152	7017.784874	1847.636253	2216.727737	1815.424538	JUN
ENSG00000099194	-1.445857772	7.36E-126	2.78E-123	49926.53783	51432.22033	46618.36086	17572.99291	19018.28096	17732.2388	SCD
ENSG00000159307	2.757303752	3.14E-124	1.16E-121	174.5271326	188.5206377	218.1906092	1302.34272	1445.59192	1188.16528	SCUBE1
ENSG00000167772	-2.827674679	4.12E-121	1.49E-118	899.4036282	890.7350766	856.4491202	109.9675291	136.9629287	127.3982132	ANGPTL4
ENSG00000115525	1.599962993	8.71E-119	3.10E-116	1809.514442	1783.465081	1844.424355	5281.167863	5912.424914	5294.988236	ST3GAL5
ENSG00000124145	-1.826358423	9.71E-119	3.39E-116	10324.93951	10317.76443	9707.442945	2689.205938	3241.07233	2635.550536	SDC4
ENSG00000111057	-1.482887858	5.80E-118	1.98E-115	156036.893	146811.6934	151044.9982	52951.63731	58713.36036	50732.79957	KRT18
ENSG00000156026	-1.90322746	3.16E-117	1.06E-114	2995.870657	2748.01247	2974.121528	755.2315427	857.4569907	722.807918	MCU
ENSG00000011422	-2.309520122	2.28E-116	7.53E-114	2147.861522	2229.331351	2115.633243	417.1495524	519.0779903	379.5405102	PLAUR
ENSG00000124882	-1.809769295	2.74E-115	8.88E-113	75022.0405	71612.90574	70161.53543	19213.41762	23640.49207	18992.95029	EREG
ENSG00000092820	-1.4342241	8.13E-115	2.59E-112	39802.89342	39112.54627	38805.3018	14391.20515	15659.81183	13518.36596	EZR
ENSG00000133816	-1.871270073	1.50E-114	4.70E-112	8062.511096	8347.773635	7400.128232	2090.291875	2449.219431	1975.557014	MICAL2
ENSG00000119314	-1.505039017	8.83E-111	2.71E-108	10623.67	10523.24195	9837.949478	3469.884513	3931.641718	3521.145059	PTBP3
ENSG00000110880	-1.657685596	4.67E-110	1.41E-107	12316.47611	11849.86866	11361.20541	3625.293169	4181.397647	3460.984792	CORO1C
ENSG00000125398	-1.563052112	2.05E-109	6.09E-107	3991.638959	4092.593527	3755.121559	1288.710382	1404.157757	1317.332913	SOX9
ENSG00000137801	-1.714149019	3.20E-109	9.37E-107	9014.379935	8647.012742	8016.975515	2578.329587	2875.070554	2378.98469	THBS1
ENSG00000166387	2.397947213	1.27E-107	3.65E-105	208.790128	178.5460008	191.6814698	997.8871647	1055.420215	997.0679603	PPFIBP2
ENSG00000115339	-1.751429719	4.04E-107	1.15E-104	3938.103029	3679.643558	3730.651584	1046.05476	1254.534389	1075.807134	GALNT3
ENSG00000013588	-1.803258677	1.64E-106	4.59E-104	27613.83282	28953.37858	26332.7517	7256.039274	9122.421622	7382.903397	GPRC5A
ENSG00000167767	-1.723962368	1.79E-106	4.92E-104	8492.939975	8439.540294	7979.25097	2459.273832	2827.881646	2261.318284	KRT80
ENSG00000170421	-1.367815569	3.02E-106	8.18E-104	245745.9806	237981.8698	241802.0958	91490.25772	101605.776	88038.35829	KRT8
ENSG00000180573	2.237216028	3.47E-106	9.25E-104	243.0531233	251.3608503	248.7780778	1095.131178	1231.515409	1180.202892	HIST1H2AC
ENSG00000148426	-1.516778954	4.52E-106	1.19E-103	3977.719618	3974.892811	3859.118952	1350.510316	1470.912797	1311.139944	PROSER2
ENSG00000033867	-1.627535458	8.03E-106	2.08E-103	9299.191084	8677.934117	8879.542129	2716.470615	3236.468534	2746.139262	SLC4A7
ENSG00000189143	-1.279087888	9.72E-106	2.48E-103	8991.894845	9110.833359	8824.484685	3600.75496	3864.886677	3634.387916	CLDN4
ENSG00000181649	-1.75862312	1.06E-105	2.68E-103	4499.159578	4397.817416	4414.791298	1243.269254	1489.327981	1208.513606	PHLDA2
ENSG00000137331	-1.36886014	2.62E-101	6.50E-99	10238.2113	10251.93182	9984.769327	3876.128194	4228.586555	3701.625861	IER3
ENSG00000092929	-2.278202687	8.00E-101	1.96E-98	1234.538552	1173.017301	1115.423021	237.2026867	272.7749084	219.4080339	UNC13D
ENSG00000143320	-1.511562256	1.48E-100	3.57E-98	3356.702827	3404.343579	3097.490985	1140.572306	1165.911318	1151.892178	CRABP2
ENSG00000179361	-2.507849882	1.88E-100	4.48E-98	1137.103159	1129.128899	1124.599261	170.8586402	244.0011839	185.7890609	ARID3B
ENSG00000196139	1.717398695	3.92E-100	9.24E-98	559.9858304	586.5086506	613.7885362	1879.445042	1980.783196	1931.321524	AKR1C3
ENSG00000125848	1.63380937	5.25E-100	1.22E-97	889.7671607	800.9633443	855.4295379	2578.329587	2764.579452	2559.465492	FLRT3
ENSG00000023171	4.74680101	1.08E-99	2.47E-97	8.56574884	15.95941907	16.31331658	358.984909	391.3226535	353.8839256	GRAMD1B
ENSG00000139146	-1.644198636	1.00E-98	2.27E-96	7087.086446	6628.146231	6894.415418	2101.197746	2477.993156	2021.561925	SINHCAF
ENSG00000197147	-1.636716444	1.24E-98	2.79E-96	3135.064075	3021.317522	2989.415263	917.9107799	1077.288246	951.06305	LRRC8B
ENSG00000006831	-1.406137912	4.93E-98	1.09E-95	9245.655154	9209.582264	8582.843683	3288.120002	3662.319657	3257.501535	ADIPOR2
ENSG00000077150	-1.450627298	5.62E-98	1.23E-95	5123.388525	5110.006492	4760.429693	1734.942256	1943.952829	1811.000989	NFKB2
ENSG00000197822	-1.861133614	8.78E-98	1.90E-95	2102.89134	2219.356714	1952.500078	549.8376454	631.8709904	549.4047944	OCLN
ENSG00000179295	-1.591185498	3.60E-97	7.67E-95	11459.90123	11157.62885	10940.11793	3514.416818	4198.661882	3432.674078	PTPN11
ENSG00000179820	-1.771461061	1.23E-96	2.60E-94	8349.463682	8571.205502	7779.412842	2240.247596	2785.296533	2217.082794	MYADM
ENSG00000146038	-1.820760067	2.14E-96	4.47E-94	2339.520152	2146.541864	2191.082333	642.5375459	685.9655925	565.3295711	DCDC2
ENSG00000167601	-1.640318974	3.91E-96	8.06E-94	18061.95215	18872.01304	16871.02809	5467.476487	6505.163639	5294.988236	AXL
ENSG00000166106	1.45637381	4.56E-96	9.28E-94	4535.564011	4352.93155	3984.527574	11742.89622	12539.58915	11046.48674	ADAMTS15
ENSG00000137440	-1.530703718	9.74E-95	1.96E-92	4430.633587	4079.626499	4376.047171	1444.119039	1617.083318	1404.034475	FGFBP1
ENSG00000166311	1.939269347	1.56E-94	3.11E-92	407.9437885	366.0691748	390.5000155	1422.307298	1598.668134	1446.500546	SMPD1
ENSG00000124762	-1.77067205	2.28E-93	4.50E-91	2774.231906	2763.971889	2738.59802	793.40209	917.3063377	721.0384983	CDKN1A
ENSG00000171223	-1.479836636	1.42E-92	2.77E-90	2959.466224	3203.853377	3052.629364	1075.137082	1161.307522	1071.383585	JUNB
ENSG00000239521	1.844542063	8.84E-91	1.71E-88	374.7515117	370.0590296	365.0104584	1336.877977	1376.534981	1273.982132	CASTOR3
ENSG00000143384	-1.348335949	2.38E-90	4.54E-88	37490.14124	35902.70811	35341.78078	13781.38521	15605.71723	13325.49922	MCL1
ENSG00000106348	-1.56541609	7.66E-90	1.45E-87	2890.940233	3026.30484	2966.984452	986.981294	1095.70343	924.5217555	IMPDH1
ENSG00000134247	-1.738097149	9.84E-90	1.84E-87	3854.586978	3992.847157	3492.06933	1033.331244	1275.251471	1096.155459	PTGFRN
ENSG00000116741	-1.440151111	1.28E-89	2.38E-87	10709.32749	9842.971708	11150.15188	3707.996022	4229.737504	3751.169611	RGS2
ENSG00000158373	2.387650157	6.08E-89	1.11E-86	146.6884489	151.6144811	184.5443938	819.757944	844.7965519	863.4767784	HIST1H2BD
ENSG00000034152	-1.442173513	1.42E-88	2.58E-86	5727.273818	5671.57855	5285.514571	2050.303683	2205.218247	1889.740163	MAP2K3
ENSG00000105974	-1.355575397	8.24E-88	1.48E-85	56974.00769	53250.59664	55738.52441	20908.37169	23808.53062	20145.72717	CAV1
ENSG00000174839	-1.979378734	1.42E-87	2.52E-85	1675.674617	1755.536097	1673.134531	415.3319073	504.1156536	380.42522	DENND6A
ENSG00000112715	-1.506822911	3.59E-87	6.31E-85	3678.989127	3805.323983	3429.87481	1256.901593	1383.440675	1204.974767	VEGFA
ENSG00000134748	-1.353939003	1.20E-86	2.10E-84	4681.181741	4478.611975	4587.100705	1734.033434	1931.29239	1718.106459	PRPF38A
ENSG00000143469	-2.575991934	3.07E-86	5.29E-84	864.0699142	845.8492105	716.7663471	152.6821891	128.9062858	124.7440838	SYT14
ENSG00000136997	-1.329348408	1.66E-85	2.84E-83	10950.23917	11155.63393	10555.73541	4116.057349	4743.06075	4145.750188	MYC
ENSG00000072210	1.220265145	1.74E-85	2.94E-83	5447.816262	5077.09019	5454.76523	12379.07201	13046.0067	11809.1066	ALDH3A2
ENSG00000196611	1.487811138	6.00E-85	1.01E-82	2992.658501	2871.697968	3276.937467	8274.829357	9376.781346	7992.468459	MMP1
ENSG00000197903	1.698827665	2.20E-84	3.65E-82	1372.661252	1108.182161	1287.732427	3922.478145	4444.964964	3867.066597	HIST1H2BK
ENSG00000138061	1.212613355	2.61E-84	4.31E-82	2516.188722	2535.552704	2503.074512	5725.582092	6136.859966	5651.526291	CYP1B1
ENSG00000116285	-1.429953478	2.72E-84	4.45E-82	36215.9861	34419.47961	33138.46346	12299.09563	14353.48474	11870.15157	ERRFI1
ENSG00000138772	-1.639709206	3.04E-84	4.93E-82	6545.302832	5809.22854	6667.048568	1953.059669	2296.143217	1861.429448	ANXA3
ENSG00000112559	-1.858488321	1.06E-83	1.70E-81	1492.581735	1627.860745	1691.487012	464.4083253	469.5871842	395.4652868	MDFI
ENSG00000181577	-2.312826083	1.43E-83	2.27E-81	739.866556	826.8974003	773.8629551	167.22335	146.1705206	156.5936371	C6orf223
ENSG00000137845	-1.186224579	3.16E-83	4.99E-81	9945.905122	9739.235485	9638.111349	4239.657216	4565.814607	4086.47463	ADAM10
ENSG00000169504	-1.57367471	3.28E-83	5.13E-81	3719.676434	3698.595368	3747.984483	1170.56345	1422.57294	1165.162825	CLIC4
ENSG00000163513	1.320664673	9.01E-83	1.40E-80	4931.729895	4644.190948	4527.964932	11493.87884	12721.43908	11018.17602	TGFBR2
ENSG00000171951	3.815981797	1.05E-82	1.61E-80	32.12155815	41.89347505	30.58746858	417.1495524	597.342521	464.4726523	SCG2
ENSG00000184500	1.677000467	1.77E-82	2.70E-80	494.6719955	465.815544	490.4190796	1499.557215	1634.347553	1507.545523	PROS1
ENSG00000113552	-1.473147389	7.52E-82	1.14E-79	3746.444399	3441.249736	3565.479254	1250.539835	1416.818195	1211.167735	GNPDA1
ENSG00000077063	2.586574524	1.15E-81	1.72E-79	111.3547349	99.74636916	98.89948174	606.1846438	660.644715	595.4097048	CTTNBP2
ENSG00000163435	1.201657924	1.76E-81	2.61E-79	2051.496847	2146.541864	2060.5758	4723.150815	4969.797699	4706.65621	ELF3
ENSG00000117569	1.515351176	2.34E-81	3.44E-79	981.8489608	921.656451	1047.111008	2743.735292	3005.127789	2689.517834	PTBP2
ENSG00000230439	-1.735820974	4.22E-81	6.18E-79	1905.879117	1815.383919	1948.421749	570.7405641	630.7200415	505.1693037	AL512488.1
ENSG00000164379	-1.98422592	4.27E-81	6.20E-79	1685.311084	1724.614723	1654.78205	404.4260367	509.8703985	371.5781218	FOXQ1
ENSG00000196878	-1.533609119	4.85E-81	6.97E-79	9431.960191	10002.5659	8996.794092	3097.267265	3717.565208	3013.321626	LAMB3
ENSG00000184009	-1.185065653	5.75E-81	8.21E-79	224432.2561	217968.7583	214086.7905	93296.08814	104278.2796	91159.61452	ACTG1
ENSG00000179833	-1.588375673	7.74E-81	1.10E-78	4625.504374	4843.683686	4232.286069	1455.933732	1703.404492	1403.149765	SERTAD2
ENSG00000092871	-1.454233877	5.45E-80	7.66E-78	2661.806452	2580.43857	2416.410018	926.0901829	981.7594806	890.0180728	RFFL
ENSG00000259583	1.651149051	1.51E-78	2.11E-76	798.7560793	729.1459585	688.218043	2267.512273	2528.634911	2166.654334	AC015712.2
ENSG00000160588	-1.745588557	2.16E-78	2.99E-76	1822.363066	1814.386455	1803.641064	498.0347598	623.8143476	506.0540136	MPZL3
ENSG00000144959	-1.399085849	1.14E-77	1.57E-75	15118.5467	14698.62496	14292.50449	5389.317747	6268.068149	5075.580202	NCEH1
ENSG00000101928	-1.674984318	1.24E-77	1.69E-75	2315.964343	2057.767596	2426.605841	697.0668992	773.4377151	662.6476506	MOSPD1
ENSG00000154856	2.308206237	1.96E-76	2.65E-74	209.8608466	154.6068722	174.3485709	881.5578777	958.740501	826.3189662	APCDD1
ENSG00000168702	3.002476184	3.52E-76	4.73E-74	72.80886514	74.80977687	58.1161903	488.0377117	629.5690925	533.4800178	LRP1B
ENSG00000183742	-1.228465068	5.52E-76	7.35E-74	4774.33426	4649.178266	4472.907489	1901.256784	2092.425247	1941.053332	MACC1
ENSG00000128242	3.068112524	3.01E-75	3.98E-73	55.67736746	67.82753103	43.8420383	447.1406967	463.8324393	493.6680762	GAL3ST1
ENSG00000073008	-1.316956382	3.17E-75	4.16E-73	7246.623519	7294.451977	6822.025076	2849.158708	3112.166044	2619.625759	PVR
ENSG00000074211	-1.287937256	6.15E-75	8.02E-73	4748.637013	4662.145294	4455.57459	1888.533268	2030.274002	1764.996079	PPP2R2C
ENSG00000139364	4.48041436	7.59E-75	9.83E-73	18.20221628	7.979709533	12.23498743	279.9173467	298.095786	273.3753325	TMEM132B
ENSG00000137501	1.314255978	1.14E-74	1.46E-72	2334.166559	2229.331351	2139.083636	5467.476487	6003.349884	5201.208996	SYTL2
ENSG00000168209	-1.101513069	2.31E-74	2.95E-72	6838.67973	7277.495094	6782.261366	3306.296453	3264.091309	3169.915263	DDIT4
ENSG00000102243	-1.983168813	3.14E-74	3.98E-72	970.0710561	928.6386969	1062.404742	252.6526701	268.1711125	230.0245516	VGLL1
ENSG00000175768	-1.352717499	4.51E-74	5.68E-72	3122.215452	3083.160271	3327.916581	1196.919304	1340.855563	1199.666508	TOMM5
ENSG00000099942	-1.194409918	1.09E-73	1.36E-71	7647.072277	7768.24723	7077.940229	3178.152473	3471.262126	3184.07062	CRKL
ENSG00000137936	-1.552659031	1.22E-73	1.52E-71	6245.501623	6501.468342	6528.385377	2066.662489	2547.050094	1964.940497	BCAR3
ENSG00000100311	-1.950255	1.36E-73	1.68E-71	1244.175019	1481.233582	1345.848618	368.9819571	382.1150616	305.2248858	PDGFB
ENSG00000165105	-1.363151169	3.18E-73	3.90E-71	3335.288455	3221.807724	3291.211619	1282.348624	1382.289726	1168.701664	RASEF
ENSG00000116991	2.06437963	4.47E-73	5.44E-71	307.2962396	247.3709955	326.2663315	1129.666435	1344.30841	1211.167735	SIPA1L2
ENSG00000106541	-1.483962335	4.45E-72	5.38E-70	2578.290401	2344.039675	2750.833008	903.369619	965.6461949	876.7474256	AGR2
ENSG00000108829	-1.172693725	5.62E-72	6.75E-70	16026.51608	15542.47924	15287.6168	6864.336753	7494.979763	6432.725057	LRRC59
ENSG00000124380	-1.691632869	1.49E-71	1.78E-69	1510.783952	1429.36547	1578.313379	425.3289554	517.9270413	459.1643934	SNRNP27
ENSG00000080824	-1.173270733	4.40E-71	5.21E-69	166908.9697	154792.4004	173723.567	70991.76501	78882.5903	69810.682	HSP90AA1
ENSG00000168916	1.683359215	4.43E-71	5.22E-69	476.4697792	498.7318458	480.2232567	1522.277779	1721.819675	1435.884028	ZNF608
ENSG00000143013	1.166854893	4.73E-71	5.53E-69	1928.364208	1863.262176	1847.483102	4279.645408	4359.794739	4023.660234	LMO4
ENSG00000275395	1.682045875	4.88E-71	5.68E-69	360.8321699	363.0767837	354.8146355	1198.736949	1163.60942	1099.694299	FCGBP
ENSG00000120992	-1.191690209	2.97E-70	3.43E-68	13381.84113	12619.91063	13317.78382	5432.94123	6271.520996	5516.16569	LYPLA1
ENSG00000173175	2.77877984	4.89E-70	5.61E-68	69.59670932	81.79202271	58.1161903	499.8524049	475.3419291	463.5879425	ADCY5
ENSG00000101187	-1.192962355	7.18E-70	8.18E-68	11917.09807	12034.39944	11348.97043	5173.926802	5544.12124	4728.773955	SLCO4A1
ENSG00000131374	-1.671144272	9.48E-70	1.07E-67	1736.705577	1805.409282	1583.41129	529.8435492	596.191572	487.4751075	TBC1D5
ENSG00000137547	-1.302809171	9.91E-70	1.12E-67	5093.408404	4854.655787	5333.434938	2064.844843	2235.142921	1899.47197	MRPL15
ENSG00000177409	2.192875318	2.08E-69	2.33E-67	277.3161187	204.4800568	237.5626726	1085.13413	1229.213511	974.0655051	SAMD9L
ENSG00000119411	-1.511197224	1.44E-68	1.60E-66	1643.553059	1683.718711	1512.04053	553.4729356	596.191572	550.2895043	BSPRY
ENSG00000142634	-1.048508486	2.48E-68	2.74E-66	9291.696054	9107.840968	9225.180524	4485.039306	4665.947168	4209.449295	EFHD2
ENSG00000160888	-1.219087484	2.86E-68	3.14E-66	2538.673812	2575.451252	2466.36955	1064.231211	1094.552481	1097.924879	IER2
ENSG00000142867	-1.415008734	9.08E-68	9.92E-66	4866.41606	4477.614511	4430.085033	1635.880598	1941.650931	1594.247085	BCL10
ENSG00000168016	1.920909889	1.89E-67	2.05E-65	234.4873745	230.4141128	202.8968749	815.2138313	878.1740723	836.0507741	TRANK1
ENSG00000164741	-1.655617816	2.72E-67	2.94E-65	1806.302287	1819.373773	1668.03662	518.9376785	644.5314292	521.9787902	DLC1
ENSG00000035862	-1.165601704	3.82E-67	4.09E-65	9699.639843	9595.600713	8823.465103	4027.901561	4488.701025	4023.660234	TIMP2
ENSG00000052795	1.379140957	9.37E-67	9.99E-65	1043.95064	947.590507	944.1331968	2401.109189	2724.296237	2512.575872	FNIP2
ENSG00000147041	1.218447695	1.68E-66	1.78E-64	2100.749903	2217.361786	2235.943953	4877.650649	5510.74372	4870.327526	SYTL5
ENSG00000130962	-1.306506029	5.40E-66	5.70E-64	2648.957829	2462.737855	2466.36955	961.5342625	1079.590144	1025.378674	PRRG1
ENSG00000210135	1.060334339	7.69E-66	8.06E-64	14012.49438	14133.06305	13714.40133	28527.03116	31358.75593	27417.15713	MT-TN
ENSG00000198734	1.453022401	7.87E-66	8.21E-64	1245.245738	1147.083245	1138.873413	3015.473235	3611.677902	3045.171179	F5
ENSG00000164251	-1.187580229	8.95E-66	9.27E-64	12676.23756	12077.29038	12498.03966	5232.091445	6022.916016	5107.429756	F2RL1
ENSG00000106780	1.525993791	9.55E-66	9.84E-64	701.3206863	651.3437906	596.4556373	1787.653964	2016.462614	1811.000989	MEGF9
ENSG00000082497	-2.02030249	1.14E-65	1.16E-63	934.7373422	837.8695009	828.9203985	209.9380101	244.0011839	190.21261	SERTAD4
ENSG00000116574	2.129543216	1.17E-65	1.19E-63	230.2045001	272.3075878	198.8185458	918.8196025	1132.533797	1021.839835	RHOU
ENSG00000171227	2.078070499	2.55E-65	2.58E-63	167.0321024	150.6170174	181.4856469	678.8904481	736.6073477	692.7277843	TMEM37
ENSG00000138271	-1.828493515	2.66E-65	2.68E-63	1505.430359	1502.18032	1654.78205	363.5290217	501.8137556	451.2020051	GPR87
ENSG00000131016	-1.354712284	4.91E-65	4.92E-63	30153.57735	29531.90752	28138.43193	10572.33277	13163.40349	10612.97893	AKAP12
ENSG00000197324	-1.107114931	1.11E-64	1.10E-62	6186.6121	6318.932486	5954.36055	2873.696917	3015.48633	2685.094285	LRP10
ENSG00000164687	-1.636108641	1.15E-64	1.14E-62	2035.436068	2012.88173	2059.556218	678.8904481	738.9092457	552.0589239	FABP5
ENSG00000012822	1.594764729	1.17E-64	1.15E-62	705.6035607	688.2499472	674.9634733	2030.309586	2357.143513	1866.737707	CALCOCO1
ENSG00000064932	-1.082113059	3.25E-64	3.18E-62	7250.906393	7279.490021	6818.966329	3289.937647	3565.639942	3233.61437	SBNO2
ENSG00000143344	2.566411375	2.86E-63	2.79E-61	76.02102095	77.80216794	77.48825374	431.6907133	492.6061638	447.6631658	RGL1
ENSG00000179862	-1.376573606	7.01E-63	6.80E-61	2268.852724	2482.687128	2467.389132	946.9931016	993.2689704	844.0131625	CITED4
ENSG00000016402	1.14184133	9.86E-63	9.51E-61	1626.421561	1491.208219	1606.861683	3461.70511	3582.904177	3381.360909	IL20RA
ENSG00000164684	2.383197851	1.21E-62	1.16E-60	119.9204838	115.7057882	91.76240574	534.387662	557.0593067	614.8733207	ZNF704
ENSG00000102181	1.66945047	1.38E-62	1.32E-60	477.5404978	445.8662701	422.1070664	1305.069188	1587.158644	1390.763827	CD99L2
ENSG00000065618	1.119867446	3.36E-62	3.19E-60	8609.648303	8464.476887	8014.93635	17562.99586	19840.05853	17128.86671	COL17A1
ENSG00000178980	1.154930291	4.17E-62	3.94E-60	1857.69678	1729.602041	1792.425659	3894.304645	4250.454586	3837.871173	SELENOW
ENSG00000139211	-1.243522775	7.36E-62	6.91E-60	16696.78593	15760.92379	15899.36617	6554.428262	7664.169263	6212.432313	AMIGO2
ENSG00000186660	-1.352334993	9.87E-62	9.22E-60	6648.091818	6602.212175	6196.001552	2384.750383	2906.146176	2332.979779	ZFP91
ENSG00000166002	-2.035661377	1.74E-61	1.61E-59	661.7040979	600.4731423	640.2976756	149.0468989	157.6800104	157.4783469	SMCO4
ENSG00000006062	-1.333802556	3.50E-61	3.22E-59	2715.342382	2831.79942	2586.68026	1066.048856	1178.571756	987.3361523	MAP3K14
ENSG00000117461	1.486298485	3.97E-61	3.64E-59	834.0897933	746.1028413	689.2376253	1988.503749	2289.237523	2081.722192	PIK3R3
ENSG00000070159	-1.117343968	5.73E-61	5.22E-59	6024.93359	6176.295178	5885.028955	2682.84418	3017.788228	2642.628214	PTPN3
ENSG00000168772	3.036641539	7.84E-61	7.10E-59	39.61658838	36.90615659	44.86162058	330.8114098	331.4733065	333.5355998	CXXC4
ENSG00000184557	-1.911192695	8.40E-61	7.58E-59	765.5638026	786.9988527	738.1775751	227.2056386	187.6046839	192.8667394	SOCS3
ENSG00000174938	1.291053589	9.72E-61	8.73E-59	899.4036282	883.7528307	836.0574745	2068.480134	2273.124237	2071.105674	SEZ6L2
ENSG00000183779	1.524459801	1.41E-60	1.26E-58	511.8034932	533.643075	460.8511933	1406.857314	1548.026379	1381.916729	ZNF703
ENSG00000165801	1.46923829	1.44E-60	1.28E-58	693.825656	632.3919805	562.8094219	1744.030482	1796.631359	1688.911035	ARHGEF40
ENSG00000106714	1.260559938	1.98E-60	1.76E-58	1350.176161	1431.360397	1315.261149	3197.237746	3552.979504	3071.712474	CNTNAP3
ENSG00000150593	1.249205586	4.13E-60	3.64E-58	990.4147096	1084.243033	1022.641033	2445.641494	2588.484258	2333.864489	PDCD4
ENSG00000122547	1.343189723	5.06E-60	4.43E-58	678.8355956	696.2296567	659.669739	1717.674628	1815.046543	1633.174316	EEPD1
ENSG00000131620	-1.385507674	1.02E-59	8.88E-58	3637.231101	3672.661312	3219.840859	1365.960299	1467.45995	1201.435927	ANO1
ENSG00000090530	1.354507236	1.27E-59	1.10E-57	1016.111956	1049.331804	990.0143997	2469.27088	2893.485738	2456.839153	P3H2
ENSG00000047346	1.814578428	1.43E-59	1.23E-57	248.4067164	243.3811407	273.2480526	897.0078611	972.5518888	824.5495466	FAM214A
ENSG00000139292	4.018691828	1.52E-59	1.30E-57	29.98012094	11.9695643	10.19582286	276.2820565	275.0768064	284.8765601	LGR5
ENSG00000139793	-1.462286785	2.06E-59	1.75E-57	2542.956687	2348.02953	2574.445272	818.8491215	1033.552185	862.5920686	MBNL2
ENSG00000162736	1.220027364	2.16E-59	1.83E-57	1960.485766	2153.52411	2054.458306	4646.80972	5243.723556	4487.248176	NCSTN
ENSG00000162878	1.201559873	2.19E-59	1.85E-57	1047.162796	1029.38253	1025.69978	2329.312207	2515.974472	2293.167838	PKDCC
ENSG00000129354	-1.276140469	3.37E-59	2.83E-57	1902.666961	1973.980646	1942.304255	836.11675	820.6266233	747.5797928	AP1M2
ENSG00000087074	-1.366416275	1.29E-58	1.08E-56	1547.188384	1458.291917	1435.571859	562.5611611	600.795368	560.906022	PPP1R15A
ENSG00000188112	-1.504450622	2.49E-58	2.07E-56	2041.86038	2134.5723	1904.57971	690.7051413	814.8718784	643.1840347	C6orf132
ENSG00000186469	1.277568893	3.22E-58	2.67E-56	1232.397114	1074.268396	1137.853831	2631.950117	2972.901217	2747.023972	GNG2
ENSG00000152484	-1.032601348	9.06E-58	7.47E-56	3646.867569	3504.089949	3610.340875	1734.942256	1811.593696	1716.337039	USP12
ENSG00000029725	-1.247620255	1.01E-57	8.30E-56	5068.781876	4719.998189	4967.404897	1938.518508	2328.369788	1954.323979	RABEP1
ENSG00000176678	-1.204618457	1.59E-57	1.30E-55	3613.675292	3384.394306	3330.975328	1452.298442	1628.592808	1405.803894	FOXL1
ENSG00000026025	1.104929662	1.69E-57	1.37E-55	8968.339035	8615.093904	8865.267977	17988.32482	21009.4227	17897.67954	VIM
ENSG00000197635	1.411500781	2.00E-57	1.62E-55	734.512963	731.1408859	709.6292711	1894.895026	2132.708461	1764.111369	DPP4
ENSG00000069535	2.940987617	3.08E-57	2.48E-55	53.53593025	61.84274888	40.78329144	370.7996022	461.5305413	369.8087022	MAOB
ENSG00000182107	-1.462392444	3.30E-57	2.65E-55	2040.789661	2038.815786	1809.758558	711.6080601	788.4000518	641.4146151	TMEM30B
ENSG00000172292	-1.294426055	9.15E-57	7.27E-55	2795.646278	2702.12914	2633.581045	1019.698906	1234.968256	1066.075326	CERS6
ENSG00000103044	-1.445266889	9.18E-57	7.27E-55	4047.316327	3758.44319	3620.536698	1318.701526	1628.592808	1255.403226	HAS3
ENSG00000116199	-1.185473592	9.39E-57	7.40E-55	3327.793424	3424.292853	3052.629364	1407.766137	1529.611195	1377.49318	FAM20B
ENSG00000137962	-1.155526545	1.13E-56	8.83E-55	17142.20487	16269.63027	16914.87012	7090.633569	8457.173111	7052.021927	ARHGAP29
ENSG00000121895	-1.644688909	1.42E-56	1.11E-54	2092.184154	1856.27993	2096.26118	597.0964182	767.6829702	574.1766692	TMEM156
ENSG00000279117	1.174787645	2.64E-56	2.05E-54	1641.411621	1635.840454	1546.706328	3380.819902	3923.585075	3591.037135	AP001972.5
ENSG00000163597	-1.036336549	3.80E-56	2.94E-54	4453.118678	4229.246052	4409.693387	2075.750714	2251.256206	2060.489157	SNHG16
ENSG00000189433	-1.548507683	5.29E-56	4.07E-54	1266.66011	1261.79157	1245.929553	385.340763	488.0023678	421.1218714	GJB4
ENSG00000138131	-1.287694792	6.82E-56	5.22E-54	2300.974282	2267.234971	2271.629333	881.5578777	1042.759777	882.9403943	LOXL4
ENSG00000144481	1.682128332	8.65E-56	6.59E-54	365.1150443	317.1934539	334.4229898	1024.243019	1210.798328	1029.802223	TRPM8
ENSG00000148943	-1.335287168	1.22E-55	9.25E-54	2560.088185	2621.334581	2523.466158	966.9871978	1157.854675	935.1382733	LIN7C
ENSG00000197961	-1.143040166	1.61E-55	1.22E-53	3162.902759	3026.30484	3116.863048	1320.519171	1516.950757	1381.03202	ZNF121
ENSG00000183010	-1.014149316	1.89E-55	1.42E-53	5356.805181	5617.715511	5444.569407	2714.65297	2861.259166	2558.580782	PYCR1
ENSG00000222047	-1.808011669	2.18E-55	1.63E-53	706.6742793	726.1535675	724.9230053	207.2115424	224.4350513	186.6737707	C10orf55
ENSG00000006634	-1.271457082	3.57E-55	2.66E-53	2781.726936	2436.803799	2613.189399	1082.407662	1160.156573	1005.030349	DBF4
ENSG00000006327	-1.029223648	3.92E-55	2.92E-53	13038.14045	13129.61457	13407.50706	6212.710982	7072.581487	6113.344814	TNFRSF12A
ENSG00000127526	-1.286358421	2.04E-54	1.51E-52	2313.822905	2306.136055	2192.101915	918.8196025	1028.948389	850.2061312	SLC35E1
ENSG00000138074	-1.218295434	3.93E-54	2.89E-52	2170.346612	2156.516501	2066.693294	870.6520071	993.2689704	888.2486532	SLC5A6
ENSG00000159322	-1.30035504	8.21E-54	6.00E-52	3262.479589	2995.383466	3012.865655	1168.745805	1420.271042	1181.087602	ADPGK
ENSG00000164120	1.244684253	8.31E-54	6.05E-52	1994.748761	1712.645158	2020.812091	4353.260035	4907.646454	4315.614472	HPGD
ENSG00000176853	-1.165158249	1.11E-53	8.02E-52	7776.629228	7430.107039	7306.326661	3159.976021	3762.452218	3123.910353	FAM91A1
ENSG00000181026	-1.088705205	1.56E-53	1.13E-51	3401.673008	3681.638486	3525.715545	1607.707099	1777.065226	1608.402442	AEN
ENSG00000101255	-1.30995301	1.81E-53	1.30E-51	1798.807256	1935.079562	1894.383887	733.4198014	835.58896	705.9984315	TRIB3
ENSG00000140941	-1.205124414	2.16E-53	1.55E-51	3160.761322	3262.703735	2993.493592	1297.798608	1504.290318	1288.137489	MAP1LC3B
ENSG00000203697	-1.39930016	4.87E-53	3.47E-51	2061.133315	1796.432109	1773.053595	717.9698179	766.5320212	652.9158427	CAPN8
ENSG00000161956	-1.340398268	6.78E-53	4.82E-51	1911.23271	1904.158187	1812.817304	761.5933005	806.8152355	658.2241016	SENP3
ENSG00000187189	1.333968499	7.88E-53	5.58E-51	754.8566165	692.239802	750.4125625	1717.674628	2015.311665	1810.116279	TSPYL4
ENSG00000120889	-1.200644401	8.65E-53	6.10E-51	5806.506995	5479.068058	5422.138597	2296.594595	2736.956676	2242.739378	TNFRSF10B
ENSG00000066654	-1.036876784	9.48E-53	6.66E-51	3571.917266	3299.609892	3328.936164	1644.060001	1710.310185	1619.018959	THUMPD1
ENSG00000187240	1.525691763	1.43E-52	1.00E-50	401.5194769	404.9702588	399.6762561	1133.301725	1278.704318	1065.190616	DYNC2H1
ENSG00000127328	-1.175288416	1.44E-52	1.01E-50	2662.877171	2575.451252	2737.578438	1135.11937	1287.911909	1113.849656	RAB3IP
ENSG00000131771	1.355952712	1.59E-52	1.10E-50	467.9040304	455.8409071	494.4974087	1199.645772	1190.081246	1239.478449	PPP1R1B
ENSG00000238266	-2.021268016	1.80E-52	1.25E-50	616.7339165	620.4224162	593.3968904	142.685141	179.548041	131.8217623	LINC00707
ENSG00000150347	1.524932784	6.40E-52	4.36E-50	533.2178653	464.8180803	428.2245601	1352.327961	1474.365644	1278.405681	ARID5B
ENSG00000105339	-1.034979684	6.93E-52	4.71E-50	4547.341915	4666.135149	4594.237781	2165.724147	2435.408043	2143.651879	DENND3
ENSG00000124602	1.953228587	7.58E-52	5.13E-50	158.4663535	149.6195537	142.74152	600.7317084	607.7010619	537.9035669	UNC5CL
ENSG00000100290	-1.325365148	9.58E-52	6.43E-50	1462.601614	1480.236118	1639.488316	640.7199008	580.0782863	606.0262225	BIK
ENSG00000112303	1.095372953	1.03E-51	6.86E-50	1485.086705	1387.471995	1455.963504	2941.858608	3287.110289	3023.053434	VNN2
ENSG00000162645	1.209270042	1.43E-51	9.54E-50	826.5947631	801.960808	815.6658288	1814.009818	2018.764512	1822.502217	GBP2
ENSG00000157483	-1.025482817	1.45E-51	9.61E-50	6749.810086	6672.034633	6492.699997	3258.128857	3518.451034	3012.436916	MYO1E
ENSG00000254285	-1.42001917	1.89E-51	1.25E-49	1050.374951	995.4687642	1019.582286	391.7025209	383.2660106	370.693412	KRT8P3
ENSG00000139182	1.118813794	2.84E-51	1.87E-49	1520.420419	1638.832845	1507.962201	3387.18166	3601.319361	3153.105777	CLSTN3
ENSG00000138764	1.546174396	6.00E-51	3.94E-49	371.5393559	335.1478004	311.9921795	968.8048429	1048.514521	958.1407285	CCNG2
ENSG00000167566	1.373166101	7.05E-51	4.62E-49	463.621156	507.709019	447.5966236	1186.922256	1269.496726	1221.784253	NCKAP5L
ENSG00000109790	-1.010616058	7.95E-51	5.19E-49	9165.351259	8627.063468	8607.313658	4176.039637	4752.268342	4181.138581	KLHL5
ENSG00000118985	-1.139311418	8.76E-51	5.69E-49	4744.354139	4331.984813	4538.160755	2004.862555	2274.275186	1907.434359	ELL2
ENSG00000170381	1.666304964	9.53E-51	6.17E-49	251.6188722	259.3405598	298.7376098	817.9402989	921.9101336	833.3966447	SEMA3E
ENSG00000185630	1.408242633	9.81E-51	6.33E-49	446.4896583	478.782572	420.0679018	1156.931112	1257.987236	1158.969856	PBX1
ENSG00000196154	-1.405262889	1.04E-50	6.68E-49	1355.529754	1236.854978	1277.536604	442.596584	522.5308373	498.0916252	S100A4
ENSG00000113916	1.726133118	1.09E-50	6.99E-49	294.4476164	297.2441801	290.5809515	992.4342294	1089.948685	840.4743232	BCL6
ENSG00000118523	-1.542981441	1.21E-50	7.73E-49	1687.452521	1833.338265	1500.825125	547.1111777	656.040919	524.6329197	CTGF
ENSG00000145632	-1.188142531	2.44E-50	1.55E-48	12332.53689	11614.46722	11831.23285	5073.956321	5965.368567	4670.383108	PLK2
ENSG00000176697	-2.022666703	3.61E-50	2.28E-48	566.410142	507.709019	601.5535487	131.7792704	153.0762144	129.1676328	BDNF
ENSG00000020577	-1.390839243	4.06E-50	2.56E-48	1606.077907	1601.926689	1440.66977	560.743516	660.644715	555.5977631	SAMD4A
ENSG00000163449	1.83323005	4.23E-50	2.65E-48	168.102821	188.5206377	177.4073178	589.8258378	674.4561027	641.4146151	TMEM169
ENSG00000188938	-1.086719081	5.94E-50	3.71E-48	2174.629487	2381.943295	2273.668498	1080.590017	1076.137297	1059.882357	FAM120AOS
ENSG00000186575	-1.048732673	6.79E-50	4.23E-48	4571.968443	4678.104713	4139.504081	2097.562455	2267.369492	2110.917616	NF2
ENSG00000115641	-1.020828243	1.16E-49	7.18E-48	6868.659851	6821.654187	7050.411508	3301.75234	3735.980392	3191.148299	FHL2
ENSG00000167491	-1.150705022	2.25E-49	1.39E-47	4132.973815	4115.535191	3655.202495	1699.498177	1949.707573	1717.221749	GATAD2A
ENSG00000169213	-1.226698294	2.83E-49	1.74E-47	2921.991073	3040.269332	2690.677653	1146.025241	1368.478338	1188.16528	RAB3B
ENSG00000163346	1.377674172	5.19E-49	3.18E-47	478.6112164	506.7115553	440.4595475	1219.639868	1306.327093	1181.972311	PBXIP1
ENSG00000203727	1.171867874	6.90E-49	4.21E-47	1034.314172	977.5144177	987.9752351	2175.721195	2446.917533	2140.11304	SAMD5
ENSG00000117394	-1.101123278	8.25E-49	5.02E-47	8155.663614	8625.068541	7805.921982	3638.925508	4256.209331	3573.342938	SLC2A1
ENSG00000153029	1.219200705	2.32E-48	1.40E-46	566.410142	592.4934328	590.3381436	1364.142654	1382.289726	1327.949431	MR1
ENSG00000148516	1.488615764	3.51E-48	2.11E-46	409.0145071	361.0818564	363.9908761	1006.066568	1154.401828	1023.609255	ZEB1
ENSG00000165556	1.655984306	1.06E-47	6.36E-46	385.4586978	343.1275099	306.8942681	1005.157745	1230.36446	1029.802223	CDX2
ENSG00000166415	1.549818697	2.31E-47	1.38E-45	394.0244466	336.1452641	340.5404835	1021.516551	1148.647083	966.1031168	WDR72
ENSG00000166575	-1.168036649	2.65E-47	1.57E-45	2548.31028	2169.483529	2438.840828	1040.601825	1102.609124	1043.072871	TMEM135
ENSG00000175538	2.092531976	2.86E-47	1.70E-45	123.1326396	99.74636916	111.1344692	438.0524712	483.3985719	501.6304645	KCNE3
ENSG00000185621	1.64276951	2.94E-47	1.74E-45	269.8210885	293.2543253	305.8746858	817.9402989	1012.835103	887.3639434	LMLN
ENSG00000175793	-1.107248057	3.56E-47	2.09E-45	3672.564815	3483.143211	3515.519722	1703.133467	1773.612379	1481.004228	SFN
ENSG00000128284	1.623380211	3.78E-47	2.22E-45	280.5282745	290.2619342	235.5235081	785.222687	872.4193274	828.0883858	APOL3
ENSG00000090339	-1.589429245	5.97E-47	3.49E-45	867.28207	880.7604397	828.9203985	286.2791046	321.1147656	252.142297	ICAM1
ENSG00000103647	-1.306307177	6.00E-47	3.50E-45	1938.000675	1854.285003	1691.487012	667.0757549	806.8152355	746.6950829	CORO2B
ENSG00000271303	-1.485185116	1.42E-46	8.22E-45	826.5947631	806.9481265	866.6449431	310.8173136	280.8315513	299.9166269	SRXN1
ENSG00000139209	1.290840861	1.68E-46	9.68E-45	643.5018816	576.5340137	708.6096888	1535.910117	1622.838063	1560.628112	SLC38A4
ENSG00000140832	-1.649783592	2.00E-46	1.15E-44	810.533984	857.8187748	786.0979425	235.3850416	302.6995819	247.7187479	MARVELD3
ENSG00000163235	-1.018758067	3.53E-46	2.01E-44	18635.85732	17884.52399	17118.78658	8384.796886	9806.085316	8289.730956	TGFA
ENSG00000182795	-1.185125628	5.81E-46	3.29E-44	2341.661589	2423.836771	2333.823853	978.801891	1172.817011	976.7196346	C1orf116
ENSG00000159840	-1.156102244	5.94E-46	3.36E-44	4711.161862	4691.071741	4259.814791	2003.04491	2284.633727	1849.043511	ZYX
ENSG00000134827	1.697206652	6.28E-46	3.53E-44	344.7713908	321.1833087	423.1266487	1141.481128	1338.553665	1055.458808	TCN1
ENSG00000140479	1.094569098	6.52E-46	3.66E-44	922.9594375	935.6209427	890.0953357	1986.686104	2031.424951	1854.35177	PCSK6
ENSG00000114805	1.333838748	6.63E-46	3.71E-44	422.933849	390.0083034	423.1266487	1025.151841	1069.231603	1021.839835	PLCH1
ENSG00000038274	-1.021254734	1.09E-45	6.08E-44	3869.577038	3852.204777	3892.765168	1849.453898	2091.274298	1787.998534	MAT2B
ENSG00000130513	-1.373073007	1.12E-45	6.25E-44	909.0400956	968.5372445	941.07445	358.984909	353.3413371	375.1169611	GDF15
ENSG00000102271	1.344123691	1.79E-45	9.90E-44	837.3019491	682.265165	753.4713093	1853.998011	2122.349921	1795.960922	KLHL4
ENSG00000240476	-1.65907306	2.72E-45	1.50E-43	1062.152856	916.6691326	1012.44521	289.0055723	377.5112657	284.8765601	LINC00973
ENSG00000164181	-1.098044184	2.91E-45	1.60E-43	2196.043859	2149.534255	2058.536635	960.62544	1076.137297	959.0254383	ELOVL7
ENSG00000276180	1.590311212	3.85E-45	2.10E-43	264.4674954	248.3684592	257.9543184	728.8756886	850.5512968	744.0409535	HIST1H4I
ENSG00000130517	1.194711744	5.38E-45	2.92E-43	695.9670932	807.9455902	762.6475499	1685.865838	1826.556032	1680.948646	PGPEP1
ENSG00000117595	-1.600633414	8.15E-45	4.41E-43	717.3814653	736.1282044	674.9634733	254.4703152	218.6803063	227.3704222	IRF6
ENSG00000165895	-1.038315926	8.48E-45	4.58E-43	1959.415047	1934.082098	1898.462217	941.5401663	969.0990418	911.2511083	ARHGAP42
ENSG00000144597	-1.222302434	1.53E-44	8.21E-43	1967.980796	1912.137897	1862.776837	795.2197351	923.0610826	748.4645026	EAF1
ENSG00000177469	-1.34496426	1.67E-44	8.95E-43	1958.344329	1814.386455	1766.936102	657.9875294	842.4946539	685.6501058	CAVIN1
ENSG00000112320	2.481296318	3.69E-44	1.97E-42	56.74808606	71.81738579	57.09660802	338.0819902	387.8698065	314.0719839	SOBP
ENSG00000164430	-1.039617412	4.00E-44	2.13E-42	2399.480394	2474.707419	2403.155448	1123.304677	1274.100522	1147.468629	CGAS
ENSG00000178026	1.927302959	4.85E-44	2.57E-42	138.1227	126.6778888	166.1919126	581.6464348	553.6064598	504.2845939	LRRC75B
ENSG00000164342	1.134063161	5.40E-44	2.86E-42	857.6456026	834.8771099	821.7833225	1776.748094	1987.68889	1757.9184	TLR3
ENSG00000178685	1.05761773	7.55E-44	3.98E-42	1037.526328	1027.387602	1061.38516	2252.06229	2230.539125	2026.870184	PARP10
ENSG00000273706	-1.167206781	1.07E-43	5.62E-42	3911.335064	3947.961291	3691.907458	1664.96292	1953.16042	1532.317398	LHX1
ENSG00000164023	-1.031998014	1.60E-43	8.35E-42	7042.116265	6854.570489	7030.019862	3284.484711	3826.905361	3130.103322	SGMS2
ENSG00000180263	-1.133209951	1.62E-43	8.40E-42	5346.097995	4946.422447	5002.070695	2193.897646	2652.937401	2133.035361	FGD6
ENSG00000184731	-1.245571716	1.61E-43	8.40E-42	1546.117666	1609.906398	1505.923036	620.7258046	735.4563987	614.8733207	FAM110C
ENSG00000114812	1.1731978	1.70E-43	8.82E-42	727.0179328	752.0876234	710.6488533	1638.607066	1769.008583	1534.971527	VIPR1
ENSG00000168389	-2.118225	1.75E-43	9.06E-42	434.7117536	506.7115553	471.0470161	99.97048098	133.5100818	94.66395009	MFSD2A
ENSG00000143514	-1.124787711	2.10E-43	1.08E-41	2321.317936	2132.577373	2146.220712	960.62544	1106.061971	964.3336972	TP53BP2
ENSG00000196449	-1.098413093	4.53E-43	2.32E-41	2009.738822	2079.711797	2092.182851	1011.519503	1001.325613	876.7474256	YRDC
ENSG00000154978	-1.076171797	5.63E-43	2.88E-41	3636.160383	3532.018932	3420.69857	1564.083616	1873.744941	1590.708245	VOPP1
ENSG00000121858	1.595949278	6.53E-43	3.32E-41	212.0022838	211.4623026	199.8381281	605.2758212	647.9842762	631.6828071	TNFSF10
ENSG00000089723	1.173534826	8.69E-43	4.41E-41	1089.99154	998.4611553	1065.463489	2265.694628	2644.880758	2208.235696	OTUB2
ENSG00000171310	-1.032793484	8.85E-43	4.47E-41	8619.28477	8328.821825	7902.782299	3861.587033	4533.588035	3758.24729	CHST11
ENSG00000154764	-1.429332425	8.83E-43	4.47E-41	1301.993824	1310.667291	1208.205009	433.5083584	555.9083577	434.3925186	WNT7A
ENSG00000094975	-1.098237256	9.59E-43	4.83E-41	11840.00633	10500.30028	11309.20672	4991.253469	5942.349588	4790.703642	SUCO
ENSG00000169085	-2.841351454	1.10E-42	5.53E-41	258.0431838	254.3532414	286.5026224	27.26467663	40.28321433	44.2354907	C8orf46
ENSG00000105856	1.263107995	1.68E-42	8.43E-41	581.4002025	593.4908965	647.4347516	1366.869122	1599.819083	1411.996863	HBP1
ENSG00000142459	1.155934795	1.97E-42	9.84E-41	596.390263	553.5923488	568.9269156	1278.713334	1271.798624	1278.405681	EVI5L
ENSG00000081041	-3.157640661	2.50E-42	1.24E-40	222.7094698	216.4496211	204.9360395	23.62938641	18.41518369	29.19542386	CXCL2
ENSG00000188549	-1.132706624	3.07E-42	1.52E-40	2371.64171	2366.98134	2221.669801	1036.057712	1178.571756	965.218407	CCDC9B
ENSG00000073910	1.478297816	7.75E-42	3.83E-40	335.1349234	368.0641022	303.8355212	869.7431845	1018.589848	920.9829163	FRY
ENSG00000134109	-1.116507636	8.04E-42	3.95E-40	1973.334389	2046.795495	1855.639761	884.2843454	980.6085316	849.3214214	EDEM1
ENSG00000173846	-1.874461822	1.02E-41	5.01E-40	472.1869048	549.6024941	555.6723459	133.5969155	163.4347553	135.3606015	PLK3
ENSG00000163581	1.574186303	1.03E-41	5.05E-40	215.2144396	219.4420121	196.7793812	628.9052076	638.7766843	613.103901	SLC2A2
ENSG00000245532	1.069690159	1.14E-41	5.57E-40	9223.170063	9190.630454	8636.881545	19048.01192	21186.66884	16551.1512	NEAT1
ENSG00000185716	-1.187395681	1.39E-41	6.75E-40	2828.838554	2752.999789	2795.694628	1203.281062	1404.157757	1077.576553	MOSMO
ENSG00000005001	-1.374790708	1.41E-41	6.79E-40	1535.41048	1318.647	1387.651491	581.6464348	584.6820822	471.5503308	PRSS22
ENSG00000164933	-1.017089466	1.69E-41	8.17E-40	4329.986039	4087.606208	4213.933588	1920.342057	2306.501757	2020.677215	SLC25A32
ENSG00000066923	2.140487135	1.81E-41	8.70E-40	95.29395584	129.6702799	83.60574745	455.3200997	475.3419291	432.623099	STAG3
ENSG00000120913	-1.449023988	2.23E-41	1.07E-39	815.887577	951.5803618	897.2324117	317.1790715	354.4922861	306.9943054	PDLIM2
ENSG00000179178	-1.682802438	2.37E-41	1.13E-39	576.0466095	593.4908965	596.4556373	160.8615921	202.5670206	188.4431904	TMEM125
ENSG00000165861	1.806224232	2.73E-41	1.30E-39	144.5470117	143.6347716	143.7611023	510.7582755	539.795072	461.8185229	ZFYVE1
ENSG00000185697	-1.056396258	2.91E-41	1.38E-39	3606.180262	3114.081645	3365.641126	1554.086568	1749.442451	1550.011594	MYBL1
ENSG00000146278	1.597152003	3.42E-41	1.62E-39	231.2752187	198.4952746	200.8577103	628.9052076	662.9466129	615.7580305	PNRC1
ENSG00000260704	2.357141874	3.53E-41	1.67E-39	67.45527211	76.80470425	56.07702573	318.087894	378.6622147	331.7661802	LINC00543
ENSG00000158615	-1.037957143	4.94E-41	2.31E-39	3671.494097	3714.554787	3392.150265	1774.930449	1891.009175	1588.054116	PPP1R15B
ENSG00000062038	-1.599581607	6.35E-41	2.96E-39	632.7946956	696.2296567	619.9060299	225.3879935	223.2841023	195.5208689	CDH3
ENSG00000227954	1.492477367	6.42E-41	2.98E-39	280.5282745	311.2086718	300.7767744	835.2079275	919.6082356	760.85044	TARID
ENSG00000163293	-1.016695701	6.93E-41	3.21E-39	2877.020892	2675.197621	2666.207678	1285.075092	1467.45995	1313.794074	NIPAL1
ENSG00000165023	2.39429312	1.29E-40	5.91E-39	52.46521164	56.85543042	62.19451945	279.9173467	309.6052758	313.1872741	DIRAS2
ENSG00000151632	1.607977705	1.29E-40	5.92E-39	233.4166559	210.4648389	192.7010521	632.5404978	688.2674905	620.1815796	AKR1C2
ENSG00000172296	1.460367685	1.35E-40	6.16E-39	320.1448629	280.2872973	308.9334327	777.9521065	905.7968479	820.1259975	SPTLC3
ENSG00000087495	-1.195149338	2.09E-40	9.51E-39	3861.01129	3410.328362	3771.434876	1473.201361	1859.933553	1496.044295	PHACTR3
ENSG00000225138	1.658872146	2.32E-40	1.06E-38	360.8321699	301.2340349	274.2676349	996.0695196	1110.665766	851.090841	SLC9A3-AS1
ENSG00000241388	2.548345299	3.14E-40	1.42E-38	52.46521164	46.8807935	40.78329144	271.7379438	257.8125717	288.4153993	HNF1A-AS1
ENSG00000166780	1.65863136	3.34E-40	1.51E-38	171.3149768	170.5662913	171.289824	533.4788394	569.7197455	518.439951	C16orf45
ENSG00000247626	-1.254024017	3.64E-40	1.64E-38	1917.657022	1905.155651	1783.249418	751.5962525	905.7968479	698.920753	MARS2
ENSG00000103460	1.210254266	4.50E-40	2.01E-38	441.1360653	458.8332981	465.9491047	1017.881261	1066.929705	1076.691844	TOX3
ENSG00000186318	1.0323981	7.48E-40	3.33E-38	1766.685698	1802.416891	1636.429569	3399.905176	3908.622739	3345.087806	BACE1
ENSG00000005238	1.340681072	8.35E-40	3.70E-38	453.9846885	406.9651862	411.9112435	1016.972438	1186.628399	1022.724545	FAM214B
ENSG00000153956	1.242227824	9.18E-40	4.06E-38	481.8233722	525.6633655	465.9491047	1105.128226	1238.421103	1145.699209	CACNA2D1
ENSG00000197249	1.79632641	1.09E-39	4.79E-38	172.3856954	143.6347716	153.9569252	527.1170815	606.5501129	499.8610449	SERPINA1
ENSG00000118526	3.499644024	2.01E-39	8.79E-38	9.636467445	20.94673752	21.41122801	206.3027198	216.3784084	169.8642843	TCF21
ENSG00000053747	-1.007819007	2.86E-39	1.25E-37	25570.90172	23868.30868	23602.31034	11313.93198	13766.50076	11250.8547	LAMA3
ENSG00000116191	-1.097572547	2.88E-39	1.25E-37	3711.110685	3616.803346	3356.464885	1593.165938	1885.254431	1520.81617	RALGPS2
ENSG00000184602	1.400955749	3.11E-39	1.35E-37	353.3371396	389.0108397	347.6775595	916.0931348	1069.231603	897.9804611	SNN
ENSG00000103089	-1.144335429	3.71E-39	1.61E-37	1577.168505	1617.886108	1490.629302	674.3463353	779.19246	670.6100389	FA2H
ENSG00000145332	-1.108830744	4.15E-39	1.79E-37	1636.058028	1511.157493	1534.47134	691.6139639	782.6453069	699.8054628	KLHL8
ENSG00000169252	-1.239461941	4.70E-39	2.01E-37	1290.215919	1278.748453	1256.125376	513.4847432	612.3048578	498.976335	ADRB2
ENSG00000189431	-1.010132439	9.91E-39	4.23E-37	2023.658163	2049.787886	1934.147597	976.9842459	1065.778756	943.9853714	RASSF10
ENSG00000174775	-1.037119567	1.20E-38	5.10E-37	1656.401682	1538.089012	1585.450455	774.3168163	804.5133376	752.0033418	HRAS
ENSG00000154359	-1.920664098	1.66E-38	7.05E-37	573.9051723	561.5720584	535.2807001	119.9645772	188.7556328	136.2453113	LONRF1
ENSG00000101441	2.442905646	1.77E-38	7.48E-37	67.45527211	49.87318458	63.21410173	294.4585076	384.4169596	303.4554662	CST4
ENSG00000164758	-1.375509148	2.03E-38	8.56E-37	743.0787119	792.9836348	784.0587779	276.2820565	307.3033779	311.4178545	MED30
ENSG00000117174	-1.054321143	2.47E-38	1.04E-36	3409.168038	3147.995411	3374.817367	1520.460133	1794.329461	1473.92655	ZNHIT6
ENSG00000149948	-1.012801295	2.96E-38	1.24E-36	11226.48457	10595.05933	10640.36074	5015.791677	6125.350476	4954.374958	HMGA2
ENSG00000145687	1.40224052	5.79E-38	2.42E-36	295.518335	269.3151967	292.6201161	730.6933337	809.1171335	728.1161769	SSBP2
ENSG00000163565	1.291671112	9.18E-38	3.81E-36	837.3019491	725.1561038	964.5248425	2059.391908	2235.142921	1894.163712	IFI16
ENSG00000008513	-1.033821897	1.21E-37	5.01E-36	8485.444945	8620.081223	7848.744438	3907.028161	4618.75826	3669.776308	ST3GAL1
ENSG00000185187	-1.0623058	1.31E-37	5.41E-36	1469.025926	1573.997705	1422.317289	717.0609954	730.8526028	691.8430745	SIGIRR
ENSG00000137752	1.930628539	1.50E-37	6.13E-36	101.7182675	96.75397808	118.2715452	384.4319405	431.6058678	392.8111574	CASP1
ENSG00000106868	1.162861489	1.63E-37	6.63E-36	715.2400281	829.8897914	790.1762716	1621.339437	1915.179104	1698.642843	SUSD1
ENSG00000210144	1.114948771	1.66E-37	6.72E-36	928.3130305	987.4890547	918.6436397	2212.98292	2101.632839	1826.925766	MT-TY
ENSG00000152078	-1.082613229	2.02E-37	8.19E-36	2035.436068	1832.340801	1954.539242	841.5696853	999.0237153	912.1358181	TMEM56
ENSG00000162814	2.563872842	2.36E-37	9.51E-36	42.8287442	45.88332981	38.74412687	229.0232837	272.7749084	253.0270068	SPATA17
ENSG00000106617	-1.124028671	2.47E-37	9.94E-36	1852.343187	1699.67813	1725.133228	771.5903486	902.3440009	752.0033418	PRKAG2
ENSG00000166444	1.155168879	3.53E-37	1.41E-35	721.6643398	742.1129865	614.8081185	1514.098376	1623.989012	1493.390166	ST5
ENSG00000129474	-1.091318691	3.54E-37	1.41E-35	1583.592817	1573.997705	1557.921733	707.9727698	817.1737764	692.7277843	AJUBA
ENSG00000105204	1.812672835	5.09E-37	2.03E-35	137.0519814	149.6195537	132.5456972	445.3230516	558.2102557	472.4350406	DYRK1B
ENSG00000114019	-1.019230017	5.13E-37	2.04E-35	3992.709678	4302.060902	3789.787357	2127.5536	2059.047727	1778.266726	AMOTL2
ENSG00000142273	-1.355075137	6.26E-37	2.47E-35	862.9991956	891.7325403	834.0183099	354.4407962	362.5489289	297.2624975	CBLC
ENSG00000170802	-1.107093697	1.06E-36	4.16E-35	2776.373343	2483.684592	2734.519691	1156.022289	1406.459655	1154.546307	FOXN2
ENSG00000188641	1.000418887	2.48E-36	9.62E-35	1122.113098	982.5017362	1066.483071	2096.653633	2227.086278	2021.561925	DPYD
ENSG00000115165	3.013538637	3.45E-36	1.33E-34	23.55580931	25.93405598	21.41122801	195.3968492	174.9442451	201.7138376	CYTIP
ENSG00000183760	-2.391548191	3.61E-36	1.39E-34	253.7603094	293.2543253	296.6984452	52.71170815	64.45314292	45.12020051	ACP7
ENSG00000179750	-1.086405803	3.70E-36	1.43E-34	1769.897854	1785.460008	1712.89824	785.222687	928.8158275	772.3516675	APOBEC3B
ENSG00000157570	-1.068839923	5.56E-36	2.13E-34	2733.544599	2643.278783	2456.173727	1135.11937	1398.403012	1205.859476	TSPAN18
ENSG00000075651	1.124899044	5.86E-36	2.24E-34	562.1272676	557.5822036	531.202371	1185.104611	1278.704318	1139.50624	PLD1
ENSG00000118707	-1.024997288	6.17E-36	2.36E-34	1409.065684	1366.525257	1316.280731	666.1669323	677.9089497	667.0711997	TGIF2
ENSG00000187800	-1.305233498	7.10E-36	2.70E-34	1688.52324	1785.460008	1542.627999	644.355191	797.6076437	593.6402851	PEAR1
ENSG00000012504	4.488624182	9.13E-36	3.46E-34	3.212155815	4.987318458	8.156658288	121.7822223	119.698694	127.3982132	NR1H4
ENSG00000115226	1.184764831	1.01E-35	3.81E-34	474.328342	504.7166279	509.791143	1080.590017	1229.213511	1079.345973	FNDC4
ENSG00000181634	1.007879212	1.05E-35	3.95E-34	1064.294293	1058.308977	936.9961208	1993.956684	2171.840727	1989.712371	TNFSF15
ENSG00000117525	-1.190487658	1.42E-35	5.30E-34	1653.189526	1387.471995	1406.003972	671.6198677	679.0598987	598.948544	F3
ENSG00000108960	1.041806773	2.15E-35	7.97E-34	842.6555421	854.8263837	846.2532974	1603.162986	1886.405379	1751.725432	MMD
ENSG00000100302	1.449073235	2.60E-35	9.54E-34	261.2553396	222.4344032	230.4255966	614.3640467	676.7580007	658.2241016	RASD2
ENSG00000147180	1.604417065	3.08E-35	1.12E-33	208.790128	217.4470848	232.4647612	609.819934	779.19246	618.4121599	ZNF711
ENSG00000162654	1.425846708	4.15E-35	1.51E-33	230.2045001	276.2974426	235.5235081	660.713997	681.3617966	653.8005525	GBP4
ENSG00000165959	-1.170947045	6.04E-35	2.18E-33	1299.852386	1409.416196	1199.028768	548.9288228	627.2671945	562.6754416	CLMN
ENSG00000226887	-1.078419132	6.23E-35	2.24E-33	1479.733112	1449.314744	1381.533998	633.4493204	743.5130416	667.9559095	ERVMER34-1
ENSG00000131746	-1.004386001	7.02E-35	2.52E-33	14977.21185	14644.76192	13247.43264	6646.21934	8140.662141	6590.203404	TNS4
ENSG00000112183	-2.068337409	9.52E-35	3.39E-33	517.1570862	407.9626499	476.1449276	98.15283587	146.1705206	92.89453046	RBM24
ENSG00000070404	-1.164812802	1.16E-34	4.10E-33	1048.233514	1167.032519	1112.364274	457.1377448	525.9836842	503.3998841	FSTL3
ENSG00000101003	-1.139275911	1.22E-34	4.30E-33	1178.861184	1168.029983	1134.795084	542.5670649	563.9650006	476.8585897	GINS1
ENSG00000114770	1.070204274	2.01E-34	7.08E-33	1154.234656	1099.204988	997.1514757	2183.900598	2520.578268	2125.072973	ABCC5
ENSG00000047365	-1.028581842	2.02E-34	7.11E-33	3063.325929	2882.670069	2912.946591	1323.245639	1648.15894	1377.49318	ARAP2
ENSG00000077713	-1.220269922	3.61E-34	1.26E-32	799.8267979	779.0191431	795.2741831	335.3555226	351.0394391	333.5355998	SLC25A43
ENSG00000139515	1.208302595	3.69E-34	1.28E-32	432.5703164	438.8840243	371.1279521	973.3489557	941.4762663	955.486599	PDX1
ENSG00000139324	-1.050893836	3.72E-34	1.29E-32	2575.078245	2282.196926	2518.368246	1069.684146	1314.383736	1180.202892	TMTC3
ENSG00000175575	1.170297885	3.94E-34	1.36E-32	546.0664885	452.848516	504.6932316	1112.398807	1179.722705	1091.73191	PAAF1
ENSG00000169903	1.144362695	5.85E-34	2.02E-32	502.1670257	560.5745947	591.3577259	1245.995722	1271.798624	1142.16037	TM4SF4
ENSG00000181444	1.874577153	6.76E-34	2.32E-32	101.7182675	129.6702799	133.5652795	388.9760533	460.3795923	491.0139467	ZNF467
ENSG00000104327	-3.005495386	7.63E-34	2.60E-32	232.3459373	175.5536097	214.1122801	21.8117413	36.83036738	20.34832572	CALB1
ENSG00000235106	1.095813389	1.07E-33	3.65E-32	473.2576234	467.8104713	493.4778264	1030.604777	1039.30693	997.0679603	BRD3OS
ENSG00000115112	-1.321375076	1.23E-33	4.18E-32	773.0588328	719.1713216	742.2559042	297.1849753	326.8695105	272.4906227	TFCP2L1
ENSG00000146232	-1.202394352	2.44E-33	8.20E-32	1367.307659	1445.324889	1290.791174	558.0170484	687.1165415	543.2118257	NFKBIE
ENSG00000213626	1.179441203	2.93E-33	9.80E-32	755.9273351	707.2017573	757.5496385	1505.918973	1930.141441	1598.670634	LBH
ENSG00000177432	1.750925634	3.32E-33	1.11E-31	132.769107	152.6119448	133.5652795	418.9671976	536.342225	458.2796836	NAP1L5
ENSG00000112759	-1.039916788	3.90E-33	1.30E-31	2632.89705	2606.372626	2448.017069	1219.639868	1412.214399	1112.964946	SLC29A1
ENSG00000138079	2.15120666	6.46E-33	2.15E-31	72.80886514	61.84274888	71.37076002	277.1908791	349.8884902	289.3001092	SLC3A1
ENSG00000147130	1.010054028	9.63E-33	3.18E-31	1325.549633	1345.57852	1296.908668	2521.982588	3014.335381	2462.147412	ZMYM3
ENSG00000124313	1.43542611	9.81E-33	3.23E-31	245.1945605	279.2898336	221.2493561	659.8051745	723.9469089	636.1063562	IQSEC2
ENSG00000185585	-1.353525574	1.07E-32	3.52E-31	845.8676979	989.483982	796.2937654	341.7172804	372.9074698	317.6108232	OLFML2A
ENSG00000210194	1.861000996	1.09E-32	3.56E-31	120.9912024	107.7260787	88.70365888	398.9731014	397.0773984	356.538055	MT-TE
ENSG00000137449	1.271358533	1.25E-32	4.05E-31	707.7449979	655.3336454	551.5940167	1439.574926	1749.442451	1435.884028	CPEB2
ENSG00000184678	1.790860515	1.39E-32	4.48E-31	107.0718605	100.7438328	106.0365577	348.0790383	356.794184	380.42522	HIST2H2BE
ENSG00000086730	-1.02893488	1.41E-32	4.56E-31	1495.793891	1363.532866	1456.983087	695.2492541	759.6263273	663.5323604	LAT2
ENSG00000260916	1.20356071	2.04E-32	6.52E-31	622.0875095	534.6405387	675.9830556	1411.401427	1526.158349	1285.48336	CCPG1
ENSG00000138660	-1.031501499	2.08E-32	6.65E-31	2999.082813	2733.050515	2840.556249	1325.972107	1600.970032	1273.097422	AP1AR
ENSG00000131018	1.001986369	2.13E-32	6.79E-31	1064.294293	942.6031885	985.9360706	1954.877314	2175.293574	1866.737707	SYNE1
ENSG00000067836	1.072291574	2.18E-32	6.94E-31	644.5726002	691.2423383	679.0418025	1394.133798	1545.724481	1302.292846	ROGDI
ENSG00000204767	-1.644863253	2.60E-32	8.24E-31	663.8455351	587.5061143	551.5940167	183.582156	232.4916941	163.6713156	FAM196B
ENSG00000001626	2.15817422	2.91E-32	9.19E-31	55.67736746	55.85796673	65.2532663	260.8320731	265.8692146	262.7588147	CFTR
ENSG00000156050	2.451882329	3.06E-32	9.63E-31	51.39449304	34.91122921	41.80287373	234.476219	248.6049798	216.7539044	FAM161B
ENSG00000165215	-1.024422007	3.26E-32	1.02E-30	1412.27784	1590.954588	1450.865593	682.5257383	755.0225314	753.7727615	CLDN3
ENSG00000119917	1.040269069	3.32E-32	1.04E-30	789.1196119	738.1231318	729.0013345	1535.001294	1681.536461	1427.03693	IFIT3
ENSG00000188277	1.514898645	5.41E-32	1.68E-30	176.6685698	183.5333193	167.2114949	471.6789057	537.493174	499.8610449	C15orf62
ENSG00000198478	-1.059488651	6.25E-32	1.94E-30	1643.553059	1717.632477	1648.664556	702.5198345	880.4759703	824.5495466	SH3BGRL2
ENSG00000048052	-1.465094366	6.25E-32	1.94E-30	625.2996653	603.4655334	582.1814853	222.6615258	247.4540309	188.4431904	HDAC9
ENSG00000131459	-1.084675119	8.77E-32	2.70E-30	2585.785431	2575.451252	2565.269032	1165.110515	1421.421991	1063.421196	GFPT2
ENSG00000135333	1.013872912	1.27E-31	3.89E-30	591.03667	573.5416227	596.4556373	1166.019337	1243.024899	1149.238048	EPHA7
ENSG00000139350	-1.122486508	1.71E-31	5.23E-30	1265.589391	1125.139044	1263.262452	517.1200334	615.7577047	548.5200846	NEDD1
ENSG00000164463	1.502608422	1.89E-31	5.75E-30	203.4365349	164.5815091	193.7206343	527.1170815	559.3612047	505.1693037	CREBRF
ENSG00000077157	1.116514998	2.37E-31	7.19E-30	624.2289467	620.4224162	534.2611179	1209.64282	1394.950165	1255.403226	PPP1R12B
ENSG00000228223	1.321482763	2.41E-31	7.27E-30	299.8012094	286.2720795	286.5026224	662.5316421	803.3623886	717.4996591	HCG11
ENSG00000145246	1.190705207	2.57E-31	7.74E-30	689.5427816	546.610103	562.8094219	1264.172173	1474.365644	1367.761372	ATP10D
ENSG00000111700	-1.151826327	6.17E-31	1.84E-29	1567.532038	1335.603883	1496.746796	607.0934663	752.7206334	624.6051286	SLCO1B3
ENSG00000163032	1.752110576	8.67E-31	2.57E-29	137.0519814	110.7184698	122.3498743	405.3348592	467.2852862	375.1169611	VSNL1
ENSG00000133067	1.200116003	8.80E-31	2.60E-29	396.1658838	415.9423594	406.8133321	974.2577783	997.8727663	831.6272251	LGR6
ENSG00000198542	-1.06452141	1.47E-30	4.32E-29	1543.976228	1443.329962	1450.865593	696.1580766	795.3057457	635.2216464	ITGBL1
ENSG00000144824	-1.089269433	2.81E-30	8.17E-29	1269.872266	1181.994475	1255.105794	593.461128	636.4747864	515.7858215	PHLDB2
ENSG00000099860	-1.217095968	3.23E-30	9.36E-29	826.5947631	848.8416015	855.4295379	359.8937315	408.5868882	323.8037919	GADD45B
ENSG00000198937	-1.940606078	4.46E-30	1.29E-28	280.5282745	279.2898336	314.0313441	70.88815924	78.26453069	78.73917344	CCDC167
ENSG00000164603	1.267115027	4.85E-30	1.40E-28	267.6796512	290.2619342	269.1697235	646.1728361	706.6826742	640.5299053	BMT2
ENSG00000163482	1.091236644	5.60E-30	1.61E-28	442.2067839	445.8662701	422.1070664	920.6372476	984.0613786	889.133363	STK36
ENSG00000139625	1.391637627	5.94E-30	1.70E-28	260.184621	258.3430961	227.3668498	616.1816919	734.3054497	609.5650618	MAP3K12
ENSG00000170961	1.677467442	7.09E-30	2.03E-28	177.7392884	154.6068722	160.0744189	578.9199671	569.7197455	427.3148401	HAS2
ENSG00000002726	1.821013861	7.95E-30	2.27E-28	120.9912024	113.7108608	96.86031717	361.7113766	453.4738984	358.3074746	AOC1
ENSG00000106366	-2.72938851	9.61E-30	2.75E-28	182.0221628	171.563755	177.4073178	21.8117413	24.1699286	33.61897293	SERPINE1
ENSG00000071575	1.299866115	1.70E-29	4.84E-28	268.7503699	281.284761	250.8172424	601.640531	684.8146436	686.5348156	TRIB2
ENSG00000114166	1.226914655	1.87E-29	5.30E-28	463.621156	449.8561249	438.420383	1011.519503	1218.854971	938.6771126	KAT2B
ENSG00000261713	1.658774125	2.17E-29	6.14E-28	112.4254535	118.6981793	144.7806846	406.2436818	399.3792963	382.1946396	SSTR5-AS1
ENSG00000144891	3.547023129	2.98E-29	8.38E-28	7.495030235	10.97210061	14.274152	142.685141	120.849643	120.3205347	AGTR1
ENSG00000261716	1.171963434	3.71E-29	1.04E-27	471.1161862	404.9702588	418.0287373	942.4489889	1070.382552	905.0581396	AC239868.1
ENSG00000236824	1.245896971	4.04E-29	1.13E-27	301.9426466	320.185845	372.1475344	830.6638147	735.4563987	790.9305736	BCYRN1
ENSG00000185880	1.093997917	5.67E-29	1.58E-27	552.4908002	593.4908965	614.8081185	1155.113467	1404.157757	1204.974767	TRIM69
ENSG00000129048	1.703915382	1.03E-28	2.83E-27	125.2740768	94.7590507	114.193216	359.8937315	369.4546228	358.3074746	ACKR4
ENSG00000176894	-1.267327991	1.87E-28	5.09E-27	569.6222979	563.5669857	573.0052447	234.476219	245.1521329	230.0245516	PXMP2
ENSG00000164983	-1.121140067	1.92E-28	5.21E-27	1231.326396	1253.81186	1253.066629	536.2053071	672.1542048	515.7858215	TMEM65
ENSG00000167183	2.450284726	1.99E-28	5.40E-27	40.68730699	47.8782572	34.66579772	259.9232505	184.1518369	228.255132	PRR15L
ENSG00000196787	2.200264858	2.27E-28	6.13E-27	43.8994628	59.84782149	82.58616517	283.552637	265.8692146	307.8790152	HIST1H2AG
ENSG00000168539	2.277278911	2.57E-28	6.94E-27	41.75802559	47.8782572	51.99869659	243.5644446	247.4540309	197.2902885	CHRM1
ENSG00000119922	1.14426083	3.11E-28	8.33E-27	435.7824722	428.9093874	512.8498899	1017.881261	1092.250583	937.7924027	IFIT2
ENSG00000184194	1.578686879	3.26E-28	8.72E-27	152.0420419	152.6119448	121.330292	397.1554563	443.1153576	432.623099	GPR173
ENSG00000204852	1.067818927	3.30E-28	8.82E-27	574.9758909	548.6050304	488.379915	1132.392903	1199.288838	1049.265839	TCTN1
ENSG00000170456	1.485112707	7.84E-28	2.06E-26	177.7392884	149.6195537	190.6618875	459.8642125	521.3798883	469.7809112	DENND5B
ENSG00000123643	-1.378194982	9.11E-28	2.38E-26	706.6742793	776.026752	630.1018527	271.7379438	309.6052758	234.4481007	SLC36A1
ENSG00000147509	-1.370153109	1.10E-27	2.87E-26	458.2675629	506.7115553	510.8107253	194.4880266	189.9065818	186.6737707	RGS20
ENSG00000146678	-1.526376109	1.24E-27	3.23E-26	6580.636546	6222.178508	6096.082488	1914.889122	2585.031411	2064.027996	IGFBP1
ENSG00000168646	2.221054838	1.48E-27	3.82E-26	62.10167909	46.8807935	40.78329144	227.2056386	250.9068778	219.4080339	AXIN2
ENSG00000116396	-1.119758049	3.00E-27	7.73E-26	807.3218282	884.7502944	756.5300562	383.5231179	370.6055718	372.4628317	KCNC4
ENSG00000274750	1.954155966	3.99E-27	1.02E-25	83.51605119	57.85289411	87.6840766	307.1820234	272.7749084	305.2248858	HIST1H3E
ENSG00000243335	1.208979909	4.28E-27	1.09E-25	294.4476164	312.2061355	262.0326475	640.7199008	682.5127456	685.6501058	KCTD7
ENSG00000027075	-1.009701958	4.62E-27	1.18E-25	987.2025538	939.6107975	944.1331968	473.4965508	504.1156536	450.3172953	PRKCH
ENSG00000164284	-1.124598962	7.27E-27	1.84E-25	1547.188384	1704.665449	1495.727214	700.7021894	855.1550927	627.2592581	GRPEL2
ENSG00000011347	-1.927536862	7.70E-27	1.94E-25	261.2553396	292.2568616	244.6997486	67.25286902	77.11358171	66.35323604	SYT7
ENSG00000157064	1.094240606	8.33E-27	2.09E-25	510.7327746	543.6177119	518.9673836	1046.963583	1276.40242	1041.303451	NMNAT2
ENSG00000158055	1.956014375	9.44E-27	2.36E-25	64.2431163	85.78187748	82.58616517	270.8291212	352.1903881	283.1071405	GRHL3
ENSG00000280187	1.712029972	1.10E-26	2.72E-25	100.6475489	98.74890547	100.9386463	310.8173136	367.1527249	307.8790152	AC022107.1
ENSG00000168301	1.260519009	1.27E-26	3.12E-25	319.0741443	260.3380235	307.9138504	682.5257383	780.343409	664.4170702	KCTD6
ENSG00000100196	-1.143626686	1.67E-26	4.10E-25	873.7063817	793.9810985	831.9791454	336.2643451	420.096378	377.7710905	KDELR3
ENSG00000126010	-1.387844237	1.72E-26	4.21E-25	689.5427816	679.272774	700.4530305	228.1144611	329.1714085	237.9869399	GRPR
ENSG00000162702	-1.055503556	2.26E-26	5.49E-25	2311.681468	2156.516501	2074.849952	965.1695527	1248.779644	940.4465322	ZNF281
ENSG00000119862	-1.266770702	2.91E-26	7.02E-25	585.6830769	543.6177119	536.3002824	237.2026867	242.8502349	213.2150652	LGALSL
ENSG00000072121	1.055269435	3.10E-26	7.46E-25	806.2511096	830.8872551	672.9243088	1551.3601	1779.367124	1473.92655	ZFYVE26
ENSG00000100916	1.094897081	3.39E-26	8.11E-25	444.3482211	425.9169963	402.735003	855.2020236	1003.627511	863.4767784	BRMS1L
ENSG00000197283	1.273690144	3.96E-26	9.47E-25	383.3172606	486.7622815	372.1475344	966.0783753	1139.439491	903.28872	SYNGAP1
ENSG00000140297	1.638107129	4.59E-26	1.10E-24	116.7083279	107.7260787	116.2323806	393.520166	344.1337453	322.0343723	GCNT3
ENSG00000139508	1.614502673	7.69E-26	1.82E-24	115.6376093	106.728615	102.9778109	327.1761196	351.0394391	318.495533	SLC46A3
ENSG00000163545	-1.656198803	8.41E-26	1.99E-24	344.7713908	325.1731635	294.6592807	105.4234163	102.4344593	98.20278934	NUAK2
ENSG00000119986	-1.019413377	1.06E-25	2.49E-24	901.5450654	986.491591	1033.856438	458.0465674	508.7194495	476.8585897	AVPI1
ENSG00000114796	1.642125937	1.26E-25	2.95E-24	126.3447954	101.7412965	102.9778109	326.267297	371.7565208	335.3050195	KLHL24
ENSG00000111335	1.808540345	2.01E-25	4.65E-24	115.6376093	73.81231318	118.2715452	340.8084579	392.4736024	344.1521176	OAS2
ENSG00000188290	-1.363015788	2.09E-25	4.84E-24	443.2775025	450.8535886	504.6932316	178.1292207	194.5103778	172.5184137	HES4
ENSG00000188906	2.04764698	4.08E-25	9.33E-24	53.53593025	55.85796673	46.90078516	218.117413	223.2841023	205.2526768	LRRK2
ENSG00000130755	1.01076816	4.16E-25	9.49E-24	479.681935	450.8535886	534.2611179	984.2548264	1026.646491	942.2159518	GMFG
ENSG00000166510	-1.371801784	6.82E-25	1.54E-23	520.369242	442.8738791	491.4386618	168.1321726	206.0198676	189.3279002	CCDC68
ENSG00000256043	1.449730646	7.13E-25	1.60E-23	137.0519814	155.6043359	133.5652795	382.6142954	401.6811943	381.3099298	CTSO
ENSG00000257671	-1.887509577	1.15E-24	2.55E-23	418.6509746	358.0894653	343.5992304	82.70285245	139.2648267	84.04743232	KRT7-AS
ENSG00000249464	1.799058637	1.40E-24	3.09E-23	83.51605119	106.728615	142.74152	395.3378111	425.8511229	340.6132784	LINC01091
ENSG00000146904	-1.03100957	1.41E-24	3.10E-23	1372.661252	1332.611492	1296.908668	631.6316753	760.7772763	571.5225398	EPHA1
ENSG00000124574	1.029178027	1.53E-24	3.35E-23	456.1261257	468.807935	427.2049778	908.8225544	1001.325613	852.8602606	ABCC10
ENSG00000115841	1.249512325	1.60E-24	3.50E-23	342.6299536	259.3405598	296.6984452	705.2463022	778.041511	653.8005525	RMDN2
ENSG00000244879	1.190122859	1.97E-24	4.29E-23	387.600135	458.8332981	378.2650281	893.3725709	1070.382552	836.0507741	GABPB1-AS1
ENSG00000144655	-1.048223672	2.08E-24	4.51E-23	720.5936212	724.1586401	746.3342333	348.0790383	376.3603167	337.0744391	CSRNP1
ENSG00000181004	2.241570061	2.70E-24	5.83E-23	39.61658838	47.8782572	39.76370915	168.1321726	211.7746125	222.9468731	BBS12
ENSG00000160094	1.077331391	3.10E-24	6.67E-23	364.0443257	362.07932	350.7363064	784.3138644	799.9095416	690.0736549	ZNF362
ENSG00000213949	1.078566582	7.16E-24	1.52E-22	544.9957699	462.8231529	467.9882693	940.6313438	1163.60942	1014.762157	ITGA1
ENSG00000127528	-1.448059061	8.77E-24	1.86E-22	418.6509746	486.7622815	511.8303076	168.1321726	203.7179696	150.4006684	KLF2
ENSG00000164588	4.212779935	1.12E-23	2.35E-22	5.353593025	2.992391075	6.117493716	71.79698179	110.4911022	85.81685195	HCN1
ENSG00000182118	-1.098672048	1.31E-23	2.74E-22	688.472063	730.1434222	716.7663471	305.3643783	372.9074698	322.0343723	FAM89A
ENSG00000180914	-1.015127951	1.39E-23	2.91E-22	829.8069189	763.0597241	811.5874997	391.7025209	425.8511229	374.2322513	OXTR
ENSG00000164400	-4.219020999	1.70E-23	3.55E-22	79.23317677	97.75144177	76.46867145	6.36175788	5.754744904	1.769419628	CSF2
ENSG00000067798	-1.015200002	1.88E-23	3.93E-22	1743.129889	1559.03575	1431.49353	726.1492209	896.589256	723.6926278	NAV3
ENSG00000280734	1.397170399	2.01E-23	4.17E-22	171.3149768	147.6246264	147.8394315	424.4201329	428.1530208	376.8863807	LINC01232
ENSG00000158486	1.569713253	3.72E-23	7.60E-22	102.7889861	97.75144177	101.9582286	299.9114429	311.9071738	286.6459797	DNAH3
ENSG00000136783	-1.146395894	3.83E-23	7.81E-22	618.8753537	634.3869078	682.1005493	264.4673633	326.8695105	285.7612699	NIPSNAP3A
ENSG00000137648	-1.98538369	4.61E-23	9.38E-22	198.0829419	239.391286	197.7989635	55.43817582	51.79270413	53.08258883	TMPRSS4
ENSG00000278456	2.170699705	4.83E-23	9.83E-22	51.39449304	32.91630182	47.92036744	178.1292207	208.3217655	207.9068063	AC015712.7
ENSG00000120129	-1.370396512	5.05E-23	1.02E-21	472.1869048	535.6380024	569.9464979	227.2056386	216.3784084	168.0948646	DUSP1
ENSG00000147400	-1.047322241	5.85E-23	1.18E-21	1065.365012	1033.372384	1135.814667	488.0377117	612.3048578	469.7809112	CETN2
ENSG00000162069	-1.278898267	5.93E-23	1.19E-21	523.5813978	527.6582928	492.4582441	208.1203649	245.1521329	185.7890609	BICDL2
ENSG00000260804	1.149425251	1.20E-22	2.38E-21	262.3260582	259.3405598	257.9543184	558.9258709	630.7200415	542.3271159	LINC01963
ENSG00000162687	2.623262182	1.57E-22	3.08E-21	25.69724652	16.95688276	24.46997486	136.3233832	148.4724185	128.282923	KCNT2
ENSG00000123612	1.939980946	1.90E-22	3.69E-21	61.03096048	49.87318458	53.01827887	195.3968492	220.9822043	212.3303553	ACVR1C
ENSG00000118503	-1.383556798	1.98E-22	3.84E-21	381.1758234	394.9956219	374.186699	146.3204313	164.5857043	131.8217623	TNFAIP3
ENSG00000103034	1.328006756	3.39E-22	6.47E-21	271.9625257	292.2568616	283.4438755	571.6493867	854.0041437	706.8831413	NDRG4
ENSG00000145604	-1.018698415	3.48E-22	6.63E-21	1772.039291	1575.992633	1731.250722	753.4138976	1004.77846	754.6574713	SKP2
ENSG00000153162	-1.584524727	3.49E-22	6.64E-21	301.9426466	284.2771521	319.1292555	101.7881261	113.9439491	87.58627158	BMP6
ENSG00000174007	1.408410982	3.88E-22	7.37E-21	135.9812628	138.6474531	161.0940012	348.9878609	406.2849902	402.5429653	CEP19
ENSG00000105639	1.324318245	4.20E-22	7.95E-21	174.5271326	216.4496211	171.289824	439.8701163	511.0213475	460.0491032	JAK3
ENSG00000108924	1.436583145	4.61E-22	8.69E-21	140.2641373	178.5460008	127.4477857	385.340763	420.096378	404.312385	HLF
ENSG00000165424	1.183967322	4.69E-22	8.85E-21	228.0630629	252.358314	243.6801664	497.1259372	557.0593067	591.8708655	ZCCHC24
ENSG00000188761	1.626452241	4.72E-22	8.88E-21	78.16245816	89.77173224	97.87989946	280.8261693	271.6239595	268.9517834	BCL2L15
ENSG00000206538	-1.007644939	5.96E-22	1.12E-20	1018.253393	952.5778255	865.6253608	435.3260035	523.6817863	454.7408444	VGLL3
ENSG00000197406	-1.92458277	6.39E-22	1.19E-20	210.9315652	216.4496211	237.5626726	45.44112772	67.90598987	62.81439679	DIO3
ENSG00000276386	1.631829046	7.69E-22	1.43E-20	91.01108142	94.7590507	77.48825374	283.552637	275.0768064	257.4505558	CNTNAP3P2
ENSG00000135709	1.054648059	9.01E-22	1.67E-20	347.9835466	423.9220689	426.1853955	805.2167832	902.3440009	785.6223148	KIAA0513
ENSG00000184083	1.300583026	9.66E-22	1.78E-20	207.7194094	185.5282466	163.1331658	422.6024878	484.5495209	463.5879425	FAM120C
ENSG00000278864	-1.113260247	9.82E-22	1.81E-20	1369.449096	1375.502431	1222.479161	590.7346603	743.5130416	505.1693037	AC055811.4
ENSG00000146530	1.037821497	1.05E-21	1.93E-20	384.3879792	317.1934539	349.7167241	703.4286571	751.5696844	703.3443021	VWDE
ENSG00000079112	3.772525048	1.25E-21	2.28E-20	7.495030235	1.994927383	10.19582286	96.33519076	80.56642865	90.24040102	CDH17
ENSG00000278828	2.554631072	1.34E-21	2.45E-20	28.90940233	16.95688276	24.46997486	131.7792704	145.0195716	135.3606015	HIST1H3H
ENSG00000259663	2.123791156	1.59E-21	2.89E-20	71.73814653	54.86050304	41.80287373	212.6644777	306.1524289	215.8691946	AC010478.1
ENSG00000137094	1.758039517	2.01E-21	3.63E-20	101.7182675	86.77934117	82.58616517	264.4673633	377.5112657	276.9141718	DNAJB5
ENSG00000184949	1.888067089	2.02E-21	3.65E-20	51.39449304	61.84274888	57.09660802	198.1233168	232.4916941	201.7138376	FAM227A
ENSG00000198133	1.463651629	2.46E-21	4.42E-20	103.8597047	125.6804251	131.5261149	351.7143285	319.9638167	324.6885017	TMEM229B
ENSG00000235609	1.518113022	2.64E-21	4.74E-20	164.8906652	122.6880341	124.3890389	401.699569	439.6625107	338.8438587	AF127577.4
ENSG00000255737	-1.008133124	2.77E-21	4.96E-20	655.2797863	736.1282044	741.2363219	366.2554894	356.794184	337.9591489	AGAP2-AS1
ENSG00000162946	1.46679729	3.18E-21	5.67E-20	131.6983884	125.6804251	100.9386463	339.8996353	322.2657146	327.3426311	DISC1
ENSG00000228705	-2.051980277	3.89E-21	6.90E-20	165.9613838	194.5054199	184.5443938	39.07936984	51.79270413	41.58136125	LINC00659
ENSG00000104313	1.925302502	4.05E-21	7.18E-20	66.38455351	69.82245841	61.17493716	238.1115092	310.7562248	203.4832572	EYA1
ENSG00000082014	1.180909567	4.21E-21	7.44E-20	237.6995303	248.3684592	234.5039258	507.1229853	616.9086537	513.1316921	SMARCD3
ENSG00000149633	-2.862684231	5.12E-21	8.97E-20	112.4254535	119.695643	102.9778109	17.26762853	10.35854083	17.69419628	KIAA1755
ENSG00000125730	1.700205556	5.22E-21	9.14E-20	171.3149768	115.7057882	100.9386463	377.1613601	499.5118577	383.9640592	C3
ENSG00000141542	1.267386899	7.90E-21	1.37E-19	212.0022838	221.4369395	185.5639761	452.5936321	566.2668985	474.2044603	RAB40B
ENSG00000204116	1.051063638	9.31E-21	1.61E-19	596.390263	482.7724267	566.887751	1013.337148	1312.081838	1088.193071	CHIC1
ENSG00000154529	1.860402646	9.35E-21	1.62E-19	61.03096048	70.8199221	64.23368402	250.835025	270.4730105	192.8667394	CNTNAP3B
ENSG00000197461	-1.07198774	1.02E-20	1.76E-19	559.9858304	618.4274888	559.750675	278.0997016	290.0391432	260.1046853	PDGFA
ENSG00000172818	-1.134079602	1.19E-20	2.05E-19	553.5615188	634.3869078	622.9647767	292.6408625	294.6429391	239.7563596	OVOL1
ENSG00000140853	1.28744188	1.43E-20	2.46E-19	163.8199466	187.523174	161.0940012	404.4260367	458.0776943	391.0417378	NLRC5
ENSG00000178662	3.760005218	1.54E-20	2.64E-19	9.636467445	7.979709533	4.078329144	63.6175788	123.1515409	107.0498875	CSRNP3
ENSG00000281376	-1.319189842	1.65E-20	2.82E-19	470.0454676	565.5619131	431.283307	199.940962	216.3784084	173.4031235	ABALON
ENSG00000221988	1.0899385	2.14E-20	3.64E-19	275.1746815	260.3380235	232.4647612	556.1994033	539.795072	537.9035669	PPT2
ENSG00000099308	1.139781771	2.98E-20	5.01E-19	228.0630629	212.4597663	202.8968749	465.3171478	489.1533168	463.5879425	MAST3
ENSG00000102466	-2.501014412	3.06E-20	5.13E-19	159.5370721	113.7108608	144.7806846	19.08527364	27.62277554	27.42600423	FGF14
ENSG00000181035	1.368920156	3.15E-20	5.29E-19	139.1934186	195.5028835	151.9177606	403.5172141	455.7757964	400.7735457	SLC25A42
ENSG00000106069	1.450072463	3.39E-20	5.67E-19	130.6276698	127.6753525	99.91906403	311.7261361	346.4356432	321.1496625	CHN2
ENSG00000189337	-1.200685806	3.90E-20	6.51E-19	467.9040304	454.8434434	430.2637247	207.2115424	208.3217655	174.2878333	KAZN
ENSG00000137878	-1.735172373	5.34E-20	8.87E-19	269.8210885	234.4039675	214.1122801	60.89111114	79.41547967	76.085044	GCOM1
ENSG00000114541	1.234565968	6.39E-20	1.06E-18	176.6685698	184.5307829	180.4660646	410.7877946	471.8890821	394.580577	FRMD4B
ENSG00000250305	1.955381199	6.71E-20	1.11E-18	44.97018141	47.8782572	46.90078516	192.6703815	159.9819083	188.4431904	TRMT9B
ENSG00000164949	-1.101404291	7.84E-20	1.29E-18	602.8145746	506.7115553	595.436055	272.6467663	273.9258574	248.6034577	GEM
ENSG00000115257	2.310642191	9.98E-20	1.63E-18	33.19227675	39.89854766	22.43081029	156.3174793	181.849939	137.1300212	PCSK4
ENSG00000272482	1.72301016	1.07E-19	1.75E-18	76.02102095	82.7894864	67.29243088	207.2115424	275.0768064	265.4129442	AC254633.1
ENSG00000240602	-1.541785126	1.17E-19	1.90E-18	331.9227675	349.1122921	356.8538001	95.42636821	155.3781124	108.8193071	AADACP1
ENSG00000162616	1.033575916	1.91E-19	3.07E-18	465.7625932	382.0285939	515.9086367	902.4607965	1018.589848	872.3238765	DNAJB4
ENSG00000276116	-1.528002132	3.31E-19	5.26E-18	250.5481536	259.3405598	237.5626726	83.611675	85.17022458	90.24040102	FUT8-AS1
ENSG00000253552	1.014185814	3.72E-19	5.88E-18	288.0233047	290.2619342	261.0130652	572.5582092	575.4744904	547.6353748	HOXA-AS2
ENSG00000204397	1.432850478	4.06E-19	6.41E-18	118.8497652	122.6880341	163.1331658	352.6231511	409.7378372	332.65089	CARD16
ENSG00000124587	1.024243016	4.24E-19	6.66E-18	314.7912699	370.0590296	341.5600658	652.534594	776.890562	662.6476506	PEX6
ENSG00000184898	1.043856044	4.25E-19	6.67E-18	388.6708536	339.1376551	336.4621544	678.8904481	833.2870621	684.765396	RBM43
ENSG00000167656	-1.121407414	4.92E-19	7.70E-18	544.9957699	459.8307618	499.5953201	236.2938641	242.8502349	213.2150652	LY6D
ENSG00000124406	1.815121215	5.52E-19	8.63E-18	56.74808606	76.80470425	94.8211526	226.296816	322.2657146	258.3352657	ATP8A1
ENSG00000162390	-1.102900606	5.73E-19	8.94E-18	532.1471467	507.709019	515.9086367	219.9350582	276.2277554	230.9092614	ACOT11
ENSG00000248383	1.474849812	6.25E-19	9.70E-18	118.8497652	89.77173224	105.0169755	312.6349587	279.6806023	277.7988816	PCDHAC1
ENSG00000147231	1.083219903	6.98E-19	1.08E-17	229.1337815	234.4039675	256.9347361	471.6789057	530.5874801	525.5176295	CXorf57
ENSG00000225434	1.499582718	7.22E-19	1.12E-17	98.50611166	114.7083245	128.467368	280.8261693	375.2093677	313.1872741	LINC01504
ENSG00000124593	1.199304246	7.23E-19	1.12E-17	186.3050373	186.5257103	176.3877355	443.5054065	441.9644086	376.8863807	AL365205.1
ENSG00000151014	-1.0603002	8.54E-19	1.31E-17	602.8145746	590.4985054	622.9647767	277.1908791	337.2280514	260.1046853	NOCT
ENSG00000160188	2.128552745	9.77E-19	1.50E-17	47.11161862	34.91122921	33.64621544	190.8527364	177.246143	137.1300212	RSPH1
ENSG00000088002	-1.156379959	1.01E-18	1.55E-17	403.6609141	409.9575772	397.6370915	173.5851079	178.397092	191.0973198	SULT2B1
ENSG00000265194	-1.037884353	1.12E-18	1.70E-17	730.2300886	669.298137	682.1005493	317.1790715	397.0773984	303.4554662	AL359922.2
ENSG00000172367	2.486715993	1.33E-18	2.02E-17	26.76796512	14.96195537	27.52872172	123.5998674	148.4724185	115.8969856	PDZD3
ENSG00000237172	1.289831931	1.42E-18	2.14E-17	189.5171931	217.4470848	169.2506595	430.7818908	553.6064598	428.1995499	B3GNT9
ENSG00000243232	1.090136227	1.45E-18	2.19E-17	233.4166559	239.391286	231.4451789	479.8583087	552.4555108	469.7809112	PCDHAC2
ENSG00000251493	-1.014766633	1.61E-18	2.42E-17	1141.386033	1178.00462	1223.498743	660.713997	635.3238374	460.0491032	FOXD1
ENSG00000273760	-1.178116692	2.19E-18	3.28E-17	895.1207538	784.0064616	776.9217019	368.9819571	440.8134596	279.5683012	AC245041.1
ENSG00000141337	1.177723549	2.25E-18	3.37E-17	187.3757559	170.5662913	182.5052292	387.1584082	443.1153576	393.6958672	ARSG
ENSG00000249267	2.746066556	2.70E-18	4.02E-17	26.76796512	21.94420121	8.156658288	118.1469321	150.7743165	112.3581464	LINC00939
ENSG00000241635	3.857257102	2.76E-18	4.10E-17	5.353593025	1.994927383	7.137076002	61.7999337	74.81168375	72.54620474	UGT1A1
ENSG00000179981	1.182879294	3.13E-18	4.64E-17	183.0928815	224.4293306	186.5835583	485.311244	453.4738984	411.3900635	TSHZ1
ENSG00000232973	1.257423648	3.26E-18	4.81E-17	184.1636001	154.6068722	149.878596	381.7054728	428.1530208	359.1921844	CYP1B1-AS1
ENSG00000006025	1.077828991	3.26E-18	4.81E-17	217.3558768	261.3354872	267.1305589	534.387662	547.8517148	494.552786	OSBPL7
ENSG00000169429	-2.97389711	3.59E-18	5.27E-17	86.728207	90.76919593	87.6840766	14.54116087	9.207591846	9.731807953	CXCL8
ENSG00000253522	1.284373806	4.31E-18	6.28E-17	188.4464745	154.6068722	172.3094063	403.5172141	485.7004699	368.0392826	MIR3142HG
ENSG00000250508	1.944660641	4.43E-18	6.44E-17	51.39449304	60.84528519	37.72454458	165.4057049	223.2841023	190.21261	AP000808.1
ENSG00000247844	1.055486119	4.53E-18	6.58E-17	313.7205513	309.2137444	308.9334327	551.6552905	726.2488069	661.7629408	NA
ENSG00000100154	1.168532661	4.75E-18	6.89E-17	189.5171931	211.4623026	187.6031406	419.8760201	494.9080617	411.3900635	TTC28
ENSG00000169239	1.081556967	5.25E-18	7.61E-17	230.2045001	236.3988949	198.8185458	478.0406636	462.6814903	467.1267817	CA5B
ENSG00000158406	1.751441475	5.46E-18	7.89E-17	73.87958374	50.87064827	79.52741831	202.6674296	258.9635207	226.4857124	HIST1H4H
ENSG00000114423	1.380765521	5.62E-18	8.11E-17	112.4254535	126.6778888	127.4477857	310.8173136	362.5489289	283.9918503	CBLB
ENSG00000197557	1.073219928	6.78E-18	9.69E-17	221.6387512	201.4876657	224.3081029	448.9583419	469.5871842	444.1243266	TTC30A
ENSG00000121236	1.162711649	7.31E-18	1.04E-16	199.1536605	162.5865817	190.6618875	399.8819239	431.6058678	405.1970948	TRIM6
ENSG00000135324	1.697966745	7.90E-18	1.12E-16	58.88952327	116.7032519	97.87989946	289.9143948	325.7185616	275.1447521	MRAP2
ENSG00000059728	1.138937519	8.54E-18	1.21E-16	220.5680326	183.5333193	205.9556218	436.2348261	488.0023678	420.2371616	MXD1
ENSG00000180535	-1.736504723	8.70E-18	1.23E-16	192.7293489	219.4420121	224.3081029	49.07641794	75.96263273	67.23794586	BHLHA15
ENSG00000175311	2.51358747	8.79E-18	1.24E-16	17.13149768	15.95941907	25.48955715	116.329287	104.7363573	113.2428562	ANKS4B
ENSG00000136378	1.065756595	1.06E-17	1.50E-16	313.7205513	374.0488843	325.2467492	673.4375128	824.0794702	628.1439679	ADAMTS7
ENSG00000203326	-1.017357863	1.75E-17	2.43E-16	480.7526536	480.7774993	460.8511933	233.5673965	240.548337	229.1398418	ZNF525
ENSG00000131015	-1.138988831	1.75E-17	2.43E-16	531.0764281	487.7597452	482.2624213	219.9350582	269.3220615	195.5208689	ULBP2
ENSG00000221955	-1.019067992	1.81E-17	2.52E-16	618.8753537	603.4655334	508.7715607	279.0085242	299.246735	276.9141718	SLC12A8
ENSG00000133808	-1.91328915	1.92E-17	2.67E-16	183.0928815	183.5333193	146.8198492	38.17054728	44.88701025	53.08258883	NA
ENSG00000164938	1.775610356	2.18E-17	3.01E-16	72.80886514	72.81484949	41.80287373	214.4821228	216.3784084	210.5609357	TP53INP1
ENSG00000203797	1.656946513	2.22E-17	3.06E-16	69.59670932	61.84274888	62.19451945	194.4880266	226.7369492	190.21261	DDO
ENSG00000138613	1.151875053	2.23E-17	3.08E-16	186.3050373	215.4521574	184.5443938	388.9760533	458.0776943	457.3949738	APH1B
ENSG00000274070	1.998121944	3.09E-17	4.22E-16	32.12155815	39.89854766	43.8420383	173.5851079	136.9629287	152.170088	CASTOR2
ENSG00000160469	1.858001861	3.21E-17	4.38E-16	44.97018141	75.80724056	53.01827887	179.0380432	245.1521329	208.7915161	BRSK1
ENSG00000186076	-2.971564388	3.76E-17	5.11E-16	77.09173956	81.79202271	100.9386463	11.81469321	13.81138777	7.962388325	AC012085.1
ENSG00000185100	1.261011815	4.53E-17	6.14E-16	124.2033582	134.6575984	126.4282035	296.2761527	306.1524289	321.1496625	ADSSL1
ENSG00000260328	-1.119541497	4.92E-17	6.63E-16	428.287442	405.9677225	409.872079	174.4939304	215.2274594	184.9043511	AC104024.2
ENSG00000253348	1.114062517	5.02E-17	6.76E-16	205.5779722	188.5206377	186.5835583	393.520166	456.9267454	407.8512242	AC008514.1
ENSG00000172915	1.054164642	5.35E-17	7.20E-16	245.1945605	240.3887497	230.4255966	457.1377448	553.6064598	478.6280093	NBEA
ENSG00000280128	1.250661166	6.20E-17	8.30E-16	135.9812628	145.629699	121.330292	312.6349587	314.2090718	331.7661802	AL662795.1
ENSG00000150051	-1.952228056	7.00E-17	9.33E-16	139.1934186	141.6398442	145.8002669	39.07936984	35.6794184	35.38839256	MKX
ENSG00000165029	2.269312865	8.37E-17	1.11E-15	28.90940233	20.94673752	25.48955715	106.3322389	130.0572348	126.5135034	ABCA1
ENSG00000179023	1.07827199	9.67E-17	1.27E-15	221.6387512	195.5028835	252.8564069	481.6759538	481.096674	452.0867149	KLHDC7A
ENSG00000162772	-1.722103955	9.83E-17	1.29E-15	183.0928815	275.2999789	224.3081029	75.43227201	74.81168375	57.5061379	ATF3
ENSG00000103021	1.240943309	1.12E-16	1.46E-15	179.8807256	134.6575984	175.3681532	363.5290217	427.0020719	368.0392826	CCDC113
ENSG00000253305	2.03899282	1.19E-16	1.55E-15	25.69724652	44.88586612	43.8420383	138.1410283	176.0951941	158.3630567	PCDHGB6
ENSG00000116761	-1.527611807	1.44E-16	1.87E-15	212.0022838	270.3126604	244.6997486	86.33814266	95.5287654	71.66149493	CTH
ENSG00000177283	1.16433139	1.46E-16	1.89E-15	147.7591675	152.6119448	151.9177606	337.1731677	330.3223575	345.9215372	FZD8
ENSG00000170264	1.031826118	1.48E-16	1.91E-15	373.6807931	351.1072194	291.6005338	647.9904813	794.1547967	638.7604856	FAM161A
ENSG00000197580	1.777175545	1.60E-16	2.06E-15	82.44533258	57.85289411	76.46867145	223.5703484	321.1147656	199.9444179	BCO2
ENSG00000170629	1.711917075	1.86E-16	2.39E-15	65.3138349	54.86050304	64.23368402	194.4880266	239.397388	171.6337039	DPY19L2P2
ENSG00000165617	2.994634446	2.13E-16	2.72E-15	10.70718605	8.977173224	11.21540515	70.88815924	98.98161235	76.96975381	DACT1
ENSG00000162009	1.264225724	2.14E-16	2.74E-15	127.415514	123.6854978	113.1736337	283.552637	291.1900921	299.9166269	SSTR5
ENSG00000144488	1.462189091	2.29E-16	2.91E-15	81.37461398	140.6423805	117.2519629	332.6290549	309.6052758	294.608368	ESPNL
ENSG00000132031	-1.890083451	2.70E-16	3.42E-15	158.4663535	160.5916543	173.3289886	55.43817582	44.88701025	32.73426311	MATN3
ENSG00000072201	1.054954404	3.50E-16	4.39E-15	256.9724652	268.317733	250.8172424	460.7730351	608.8520108	545.8659552	LNX1
ENSG00000188010	1.064662557	3.67E-16	4.61E-15	264.4674954	254.3532414	280.3851286	468.952438	628.4181435	576.8307987	MORN2
ENSG00000124635	1.610204029	3.77E-16	4.71E-15	59.96024188	69.82245841	85.64491202	189.9439139	229.0388472	239.7563596	HIST1H2BJ
ENSG00000114200	1.617504228	3.88E-16	4.85E-15	77.09173956	101.7412965	89.72324117	210.8468326	339.5299493	276.9141718	BCHE
ENSG00000139190	1.265435985	4.09E-16	5.10E-15	163.8199466	132.662671	127.4477857	342.626103	371.7565208	305.2248858	VAMP1
ENSG00000188582	-1.867826886	4.24E-16	5.27E-15	169.1735396	172.5612186	184.5443938	45.44112772	33.37752044	63.6991066	PAQR9
ENSG00000213937	-1.281187337	4.81E-16	5.94E-15	371.5393559	435.8916332	342.5796481	179.9468658	125.4534389	165.4407352	CLDN9
ENSG00000137959	2.541173039	5.12E-16	6.32E-15	14.99006047	16.95688276	17.33289886	105.4234163	97.83066337	84.04743232	IFI44L
ENSG00000245849	1.182734121	5.40E-16	6.65E-15	157.3956349	147.6246264	138.6631909	328.9937647	362.5489289	316.7261134	RAD51-AS1
ENSG00000214357	1.337902532	5.99E-16	7.36E-15	92.08180003	129.6702799	126.4282035	307.1820234	286.5862962	287.5306895	NEURL1B
ENSG00000114698	1.077515282	6.30E-16	7.71E-15	205.5779722	207.4724478	201.8772926	476.2230185	436.2096637	385.7334789	PLSCR4
ENSG00000184574	-1.257087108	7.60E-16	9.26E-15	283.7404303	284.2771521	275.2872172	110.8763516	115.0948981	126.5135034	LPAR5
ENSG00000166920	-1.416650596	7.76E-16	9.43E-15	218.4265954	235.4014312	244.6997486	96.33519076	81.71737764	83.16272251	C15orf48
ENSG00000105290	3.377673564	8.82E-16	1.07E-14	23.55580931	23.9391286	24.46997486	145.4116087	329.1714085	274.2600423	APLP1
ENSG00000229298	-1.355512884	9.93E-16	1.20E-14	238.7702489	260.3380235	234.5039258	99.06165842	89.7740205	97.31807953	TUBB8P1
ENSG00000159164	7.221801046	1.03E-15	1.24E-14	1.070718605	0	1.019582286	8.179402989	169.1895002	130.9370525	SV2A
ENSG00000150764	1.47158495	1.12E-15	1.34E-14	86.728207	76.80470425	92.78198803	209.0291875	270.4730105	232.6786811	DIXDC1
ENSG00000179546	1.325557711	1.22E-15	1.46E-14	99.57683026	102.7387602	107.05614	238.1115092	262.4163676	275.1447521	HTR1D
ENSG00000188177	1.286123206	1.25E-15	1.49E-14	122.061921	125.6804251	110.1148869	269.9202986	326.8695105	277.7988816	ZC3H6
ENSG00000213413	2.931587192	1.46E-15	1.73E-14	14.99006047	8.977173224	7.137076002	78.15873967	82.86832662	75.20033418	PVRIG
ENSG00000203644	-1.529788959	1.49E-15	1.76E-14	239.8409675	218.4445485	219.2101915	61.7999337	96.67971439	77.85446362	AC083799.1
ENSG00000234444	-1.153730354	1.91E-15	2.24E-14	464.6918746	408.9601135	376.2258635	180.8556883	218.6803063	164.5560254	ZNF736
ENSG00000253313	-1.221495456	2.54E-15	2.94E-14	307.2962396	327.1680908	351.7558887	145.4116087	159.9819083	119.4358249	C1orf210
ENSG00000274349	1.07323283	2.55E-15	2.96E-14	205.5779722	191.5130288	236.5430904	439.8701163	490.3042658	405.1970948	ZNF658
ENSG00000166401	-1.236276841	2.87E-15	3.32E-14	424.0045676	404.9702588	380.3041927	169.9498177	212.9255614	133.5911819	SERPINB8
ENSG00000196482	1.626702902	3.10E-15	3.57E-14	71.73814653	53.86303935	58.1161903	167.22335	207.1708165	192.8667394	ESRRG
ENSG00000158125	-1.590153191	3.90E-15	4.46E-14	189.5171931	176.5510734	168.2310772	62.70875625	61.00029598	53.96729865	XDH
ENSG00000120093	1.06273246	4.41E-15	5.03E-14	226.9923443	217.4470848	226.3472675	481.6759538	524.8327352	397.2347064	HOXB3
ENSG00000253846	1.107263134	5.47E-15	6.19E-14	190.5879117	173.5586823	147.8394315	368.9819571	376.3603167	357.4227648	PCDHGA10
ENSG00000031691	-1.025574653	5.51E-15	6.23E-14	487.1769653	412.9499683	519.9869659	244.4732671	216.3784084	235.3328105	CENPQ
ENSG00000166741	-1.239856924	5.59E-15	6.31E-14	361.9028885	336.1452641	388.460851	189.0350913	126.6043879	142.43828	NNMT
ENSG00000227502	2.035946238	6.21E-15	6.97E-14	26.76796512	44.88586612	32.62663315	147.2292538	166.8876022	115.8969856	LINC01268
ENSG00000129654	1.244100526	6.52E-15	7.31E-14	122.061921	116.7032519	113.1736337	301.729088	275.0768064	256.565846	FOXJ1
ENSG00000147234	1.354764925	7.24E-15	8.10E-14	110.2840163	133.6601347	94.8211526	249.9262024	321.1147656	297.2624975	FRMPD3
ENSG00000245060	1.205214815	7.32E-15	8.17E-14	132.769107	113.7108608	139.6827732	305.3643783	302.6995819	282.2224306	LINC00847
ENSG00000227775	1.234941531	7.59E-15	8.47E-14	122.061921	134.6575984	110.1148869	267.193831	307.3033779	290.184819	AL031282.1
ENSG00000147576	1.841735292	7.78E-15	8.68E-14	43.8994628	55.85796673	55.05744344	145.4116087	241.699286	170.7489941	ADHFE1
ENSG00000105875	1.062295135	1.11E-14	1.23E-13	209.8608466	227.4217217	188.6227229	388.9760533	488.0023678	432.623099	WDR91
ENSG00000183691	-1.082410321	1.12E-14	1.23E-13	327.6398931	374.0488843	351.7558887	157.2263019	168.0385512	172.5184137	NOG
ENSG00000106804	1.564048213	1.15E-14	1.27E-13	71.73814653	101.7412965	61.17493716	203.5762522	257.8125717	234.4481007	C5
ENSG00000161082	2.295654255	1.39E-14	1.52E-13	25.69724652	24.93659229	19.37206343	98.15283587	149.6233675	97.31807953	CELF5
ENSG00000213865	1.214392043	1.53E-14	1.68E-13	124.2033582	122.6880341	122.3498743	269.9202986	318.8128677	269.8364932	C8orf44
ENSG00000225778	-1.864527643	1.73E-14	1.88E-13	124.2033582	153.6094085	129.4869503	36.35290217	42.58511229	33.61897293	PROSER2-AS1
ENSG00000123201	1.562237821	1.81E-14	1.97E-13	67.45527211	54.86050304	77.48825374	189.0350913	223.2841023	178.7113824	GUCY1B2
ENSG00000253910	2.370851555	2.25E-14	2.42E-13	18.20221628	17.95434645	17.33289886	96.33519076	80.56642865	99.08749916	PCDHGB2
ENSG00000050438	1.832848949	2.27E-14	2.45E-13	43.8994628	65.83260364	44.86162058	137.2322057	217.5293574	198.1749983	SLC4A8
ENSG00000122707	1.00024805	2.29E-14	2.46E-13	207.7194094	195.5028835	201.8772926	393.520166	436.2096637	382.1946396	RECK
ENSG00000163704	1.177023927	2.41E-14	2.58E-13	133.8398256	141.6398442	124.3890389	302.6379106	328.0204595	275.1447521	PRRT3
ENSG00000174951	-1.103059178	2.57E-14	2.75E-13	319.0741443	315.1985265	323.2075847	158.1351245	150.7743165	137.1300212	FUT1
ENSG00000268621	1.927794474	2.59E-14	2.77E-13	62.10167909	35.9086929	29.56788629	145.4116087	161.1328573	176.9419628	IGFL2-AS1
ENSG00000263142	1.032989959	3.04E-14	3.23E-13	319.0741443	280.2872973	237.5626726	592.5523054	633.0219394	488.3598173	LRRC37A17P
ENSG00000221944	1.026357646	3.09E-14	3.27E-13	221.6387512	201.4876657	252.8564069	465.3171478	502.9647046	410.5053537	TIGD1
ENSG00000253320	-1.624204526	4.23E-14	4.44E-13	173.456414	166.5764365	146.8198492	58.16464348	52.94365312	46.88962014	AZIN1-AS1
ENSG00000063180	1.079944829	4.37E-14	4.58E-13	153.1127605	188.5206377	177.4073178	394.4289886	336.0771024	366.269863	CA11
ENSG00000110944	-2.161244991	5.10E-14	5.30E-13	126.3447954	98.74890547	100.9386463	27.26467663	17.26423471	27.42600423	IL23A
ENSG00000137960	-1.062324989	5.54E-14	5.74E-13	388.6708536	357.0920016	436.3812184	201.7586071	197.9632247	167.2101548	GIPC2
ENSG00000127720	1.433775943	5.65E-14	5.85E-13	99.57683026	69.82245841	87.6840766	245.3820897	250.9068778	198.1749983	METTL25
ENSG00000159208	1.359853867	5.64E-14	5.85E-13	127.415514	90.76919593	87.6840766	278.0997016	271.6239595	234.4481007	CIART
ENSG00000075826	1.610550146	6.79E-14	7.02E-13	64.2431163	67.82753103	56.07702573	160.8615921	237.09549	178.7113824	SEC31B
ENSG00000260604	2.618108044	9.06E-14	9.28E-13	8.56574884	21.94420121	13.25456972	79.97638478	111.6420511	79.62388325	AL590004.4
ENSG00000203867	1.768412493	1.05E-13	1.07E-12	34.26299536	41.89347505	43.8420383	124.5086899	142.7176736	142.43828	RBM20
ENSG00000241749	-2.064916721	1.13E-13	1.15E-12	148.8298861	162.5865817	160.0744189	29.99114429	62.15124496	23.00245516	RPSAP52
ENSG00000262001	-1.190767932	1.26E-13	1.27E-12	271.9625257	273.3050515	269.1697235	126.3263351	128.9062858	102.6263384	DLGAP1-AS2
ENSG00000231131	-1.403467516	1.36E-13	1.37E-12	189.5171931	200.490202	191.6814698	69.07051413	82.86832662	69.00736549	LINC01468
ENSG00000047597	-1.193693239	1.44E-13	1.44E-12	286.9525861	314.2010628	287.5222047	109.9675291	154.2271634	126.5135034	XK
ENSG00000076641	1.477999382	1.47E-13	1.47E-12	99.57683026	75.80724056	62.19451945	192.6703815	240.548337	228.255132	PAG1
ENSG00000180596	1.680225496	1.49E-13	1.49E-12	42.8287442	41.89347505	49.95953201	134.505738	145.0195716	152.170088	HIST1H2BC
ENSG00000259207	2.313908555	1.53E-13	1.53E-12	18.20221628	18.95181014	21.41122801	85.42932011	123.1515409	84.04743232	ITGB3
ENSG00000224383	1.187059201	1.53E-13	1.53E-12	122.061921	147.6246264	109.0953046	276.2820565	292.3410411	294.608368	PRR29
ENSG00000178301	1.349478938	1.59E-13	1.58E-12	108.1425791	84.78441378	75.44908916	227.2056386	219.8312553	235.3328105	AQP11
ENSG00000185900	-1.369775984	1.65E-13	1.64E-12	200.2243791	205.4775205	209.0143686	86.33814266	84.0192756	68.12265567	POMK
ENSG00000073737	1.315407826	1.84E-13	1.82E-12	83.51605119	81.79202271	94.8211526	217.2085905	225.5860002	205.2526768	DHRS9
ENSG00000145911	-1.038946043	1.94E-13	1.92E-12	428.287442	475.7901809	381.323775	221.7527033	226.7369492	178.7113824	N4BP3
ENSG00000196544	1.126859775	2.10E-13	2.07E-12	124.2033582	150.6170174	134.5848618	318.087894	293.4919901	283.1071405	BORCS6
ENSG00000102837	2.018663892	2.15E-13	2.12E-12	23.55580931	26.93151967	34.66579772	106.3322389	135.8119797	104.395758	OLFM4
ENSG00000204427	1.021713275	2.21E-13	2.17E-12	208.790128	218.4445485	188.6227229	371.7084247	475.3419291	406.0818046	ABHD16A
ENSG00000182866	-1.370183918	2.85E-13	2.77E-12	208.790128	213.45723	182.5052292	85.42932011	74.81168375	73.43091455	LCK
ENSG00000171889	1.179307166	3.29E-13	3.19E-12	122.061921	117.7007156	102.9778109	249.9262024	257.8125717	268.0670736	MIR31HG
ENSG00000105696	1.808569754	4.93E-13	4.71E-12	27.83868373	48.87572089	40.78329144	123.5998674	151.9252655	138.014731	TMEM59L
ENSG00000257732	-2.545510842	5.57E-13	5.29E-12	95.29395584	92.76412332	72.39034231	19.08527364	5.754744904	18.57890609	AC089983.1
ENSG00000279095	-1.02324707	5.81E-13	5.51E-12	578.1880467	592.4934328	565.8681687	226.296816	362.5489289	269.8364932	AC243964.3
ENSG00000175938	1.209104378	6.07E-13	5.75E-12	96.36467445	127.6753525	142.74152	274.4644114	300.397684	275.1447521	ORAI3
ENSG00000241978	-1.334175296	6.11E-13	5.78E-12	240.9116861	269.3151967	205.9556218	78.15873967	100.1325613	106.1651777	AKAP2
ENSG00000173482	1.115129625	6.58E-13	6.20E-12	179.8807256	247.3709955	198.8185458	422.6024878	544.3988679	393.6958672	PTPRM
ENSG00000162415	1.216398401	6.78E-13	6.39E-12	158.4663535	134.6575984	110.1148869	291.7320399	362.5489289	283.9918503	ZSWIM5
ENSG00000130304	1.0954308	7.30E-13	6.85E-12	153.1127605	175.5536097	139.6827732	368.9819571	296.944837	333.5355998	SLC27A1
ENSG00000153291	1.826758355	7.53E-13	7.04E-12	51.39449304	28.92644706	33.64621544	146.3204313	128.9062858	127.3982132	SLC25A27
ENSG00000143001	-2.106506112	7.54E-13	7.05E-12	112.4254535	109.7210061	117.2519629	33.62643451	12.66043879	30.96484349	TMEM61
ENSG00000131398	1.082456401	7.78E-13	7.27E-12	167.0321024	147.6246264	134.5848618	292.6408625	340.6808983	318.495533	KCNC3
ENSG00000146592	-1.800275442	8.06E-13	7.51E-12	801.9682351	903.7021046	761.6279676	179.0380432	315.3600207	215.8691946	CREB5
ENSG00000066230	1.576165799	8.95E-13	8.31E-12	46.04090001	51.86811196	54.03786116	154.4998342	163.4347553	136.2453113	SLC9A3
ENSG00000173208	4.383820798	1.00E-12	9.31E-12	3.212155815	1.994927383	1.019582286	33.62643451	59.849347	36.27310237	ABCD2
ENSG00000136999	1.746055303	1.03E-12	9.53E-12	28.90940233	47.8782572	43.8420383	141.7763185	135.8119797	128.282923	NOV
ENSG00000182359	1.059289039	1.06E-12	9.78E-12	155.2541977	133.6601347	150.8981783	311.7261361	316.5109697	288.4153993	KBTBD3
ENSG00000030419	1.280560084	1.07E-12	9.88E-12	82.44533258	101.7412965	85.64491202	219.0262356	233.6426431	204.367967	IKZF2
ENSG00000164039	1.025310111	1.38E-12	1.26E-11	298.7304908	249.3659229	378.2650281	566.1964514	730.8526028	590.9861557	BDH2
ENSG00000272933	-1.096201843	1.40E-12	1.28E-11	352.266421	527.6582928	402.735003	211.7556552	200.2651227	188.4431904	AL391121.1
ENSG00000235027	1.645559495	1.44E-12	1.32E-11	53.53593025	38.90108397	43.8420383	148.1380764	149.6233675	128.282923	AC068580.3
ENSG00000105409	1.042590419	1.44E-12	1.32E-11	309.4376768	334.1503367	274.2676349	478.9494861	742.3620926	672.3794586	ATP1A3
ENSG00000137709	-1.571094619	1.51E-12	1.38E-11	172.3856954	159.5941907	138.6631909	59.07346603	56.39650006	43.35078088	POU2F3
ENSG00000109680	1.039458553	1.53E-12	1.39E-11	142.4055745	165.5789728	147.8394315	296.2761527	328.0204595	314.0719839	TBC1D19
ENSG00000165905	-1.330689435	1.65E-12	1.50E-11	185.2343187	238.3938223	251.8368246	82.70285245	101.2835103	85.81685195	LARGE2
ENSG00000128512	1.273053606	1.87E-12	1.68E-11	98.50611166	98.74890547	86.66449431	200.8497845	261.2654186	225.6010025	DOCK4
ENSG00000181085	1.03600832	1.96E-12	1.76E-11	190.5879117	177.5485371	171.289824	363.5290217	424.7001739	320.2649526	MAPK15
ENSG00000242515	2.057661684	1.99E-12	1.78E-11	23.55580931	24.93659229	23.45039258	119.0557546	85.17022458	94.66395009	UGT1A10
ENSG00000147251	1.741473484	2.00E-12	1.79E-11	42.8287442	35.9086929	48.93994973	117.2381095	173.7932961	137.1300212	DOCK11
ENSG00000153132	1.966156767	2.08E-12	1.85E-11	27.83868373	29.92391075	26.50913944	90.88225544	133.5100818	106.1651777	CLGN
ENSG00000143434	2.14153212	2.31E-12	2.06E-11	23.55580931	27.92898336	32.62663315	77.24991712	151.9252655	143.3229899	SEMA6C
ENSG00000184995	2.019428037	2.34E-12	2.09E-11	25.69724652	19.94927383	30.58746858	99.06165842	118.547745	92.00982065	IFNE
ENSG00000175155	1.559810743	2.63E-12	2.33E-11	46.04090001	54.86050304	78.50783602	176.3115755	196.8122757	157.4783469	YPEL2
ENSG00000203778	1.227490286	2.65E-12	2.35E-11	102.7889861	91.76665963	96.86031717	209.0291875	253.2087758	221.1774535	FAM229B
ENSG00000198794	1.456756752	2.90E-12	2.56E-11	88.86964421	91.76665963	93.80157031	187.2174462	333.7752044	235.3328105	SCAMP5
ENSG00000010310	1.580344217	3.09E-12	2.72E-11	76.02102095	46.8807935	78.50783602	206.3027198	238.246439	158.3630567	GIPR
ENSG00000163009	-2.061900602	3.20E-12	2.81E-11	82.44533258	91.76665963	100.9386463	21.8117413	23.01897962	21.23303553	C2orf48
ENSG00000137809	2.476286232	3.46E-12	3.03E-11	12.84862326	16.95688276	15.29373429	104.5145938	89.7740205	57.5061379	ITGA11
ENSG00000149212	1.623150167	3.91E-12	3.40E-11	39.61658838	68.82499472	43.8420383	152.6821891	166.8876022	151.2853782	SESN3
ENSG00000133019	2.361874315	4.52E-12	3.91E-11	32.12155815	24.93659229	16.31331658	69.07051413	166.8876022	141.5535702	CHRM3
ENSG00000283378	1.054522515	4.63E-12	4.00E-11	251.6188722	281.284761	197.7989635	568.922919	539.795072	410.5053537	BX088645.1
ENSG00000137941	1.177646582	4.88E-12	4.20E-11	203.4365349	192.5104925	187.6031406	339.8996353	577.7763883	406.0818046	TTLL7
ENSG00000254837	1.245430414	5.83E-12	4.98E-11	102.7889861	95.75651439	138.6631909	283.552637	288.8881942	228.255132	AP001372.2
ENSG00000176692	-1.302487199	5.84E-12	4.98E-11	292.3061792	300.2365712	258.9739006	119.9645772	147.3214695	80.50859307	FOXC2
ENSG00000162374	7.17265063	5.91E-12	5.04E-11	1.070718605	0.997463692	0	0.908822554	169.1895002	127.3982132	ELAVL4
ENSG00000260007	-1.038885189	6.09E-12	5.19E-11	394.0244466	303.2289622	335.4425721	173.5851079	178.397092	151.2853782	AC107871.1
ENSG00000249087	1.311934075	6.63E-12	5.63E-11	101.7182675	76.80470425	71.37076002	193.5792041	217.5293574	208.7915161	ZNF436-AS1
ENSG00000198074	1.188923286	7.19E-12	6.09E-11	111.3547349	87.77680486	116.2323806	245.3820897	249.7559288	223.8315829	AKR1B10
ENSG00000105792	1.001187197	8.18E-12	6.88E-11	209.8608466	191.5130288	182.5052292	366.2554894	459.2286433	345.9215372	CFAP69
ENSG00000197536	1.188926668	8.19E-12	6.89E-11	108.1425791	94.7590507	112.1540515	258.1056054	250.9068778	209.6762259	C5orf56
ENSG00000242574	-1.149212512	8.60E-12	7.23E-11	235.5580931	254.3532414	253.8759892	110.8763516	128.9062858	97.31807953	HLA-DMB
ENSG00000197757	1.293290322	9.28E-12	7.77E-11	70.66742793	73.81231318	89.72324117	194.4880266	187.6046839	191.9820296	HOXC6
ENSG00000164512	2.57573144	9.84E-12	8.23E-11	13.91934186	4.987318458	18.35248115	71.79698179	77.11358171	72.54620474	ANKRD55
ENSG00000198574	2.704143748	1.15E-11	9.58E-11	11.77790465	13.96449168	5.09791143	77.24991712	69.05693885	54.85200846	SH2D1B
ENSG00000111305	-1.676270939	1.17E-11	9.72E-11	129.5569512	124.6829614	162.1135835	42.71466005	55.24555108	33.61897293	GSG1
ENSG00000102678	2.995404084	1.30E-11	1.07E-10	4.28287442	9.974636916	6.117493716	49.07641794	59.849347	54.85200846	FGF9
ENSG00000178498	1.005649556	1.42E-11	1.17E-10	163.8199466	177.5485371	146.8198492	318.087894	362.5489289	301.6860465	DTX3
ENSG00000170558	6.688231015	1.54E-11	1.26E-10	1.070718605	0	1.019582286	2.726467663	105.8873062	104.395758	CDH2
ENSG00000120162	1.144812862	1.59E-11	1.30E-10	152.0420419	134.6575984	115.2127983	249.0173799	299.246735	339.7285685	MOB3B
ENSG00000156509	1.760386212	2.21E-11	1.79E-10	40.68730699	30.92137444	28.54830401	120.8733997	116.2458471	101.7416286	FBXO43
ENSG00000081189	1.718586961	2.55E-11	2.06E-10	37.47515117	49.87318458	28.54830401	110.8763516	136.9629287	134.4758917	MEF2C
ENSG00000196511	1.101911458	2.83E-11	2.27E-10	126.3447954	132.662671	124.3890389	253.5614927	323.4166636	248.6034577	TPK1
ENSG00000203780	1.027000054	3.13E-11	2.50E-10	161.6785094	146.6271627	159.0548366	330.8114098	353.3413371	269.8364932	FANK1
ENSG00000213760	3.06157677	3.21E-11	2.57E-10	6.42431163	7.979709533	5.09791143	37.26172473	63.30219394	62.81439679	ATP6V1G2
ENSG00000121966	1.318180143	3.49E-11	2.78E-10	82.44533258	69.82245841	67.29243088	204.4850747	164.5857043	176.9419628	CXCR4
ENSG00000135406	6.929628076	3.60E-11	2.86E-10	1.070718605	0.997463692	0	0.908822554	146.1705206	104.395758	PRPH
ENSG00000269113	2.155330241	3.64E-11	2.89E-10	20.34365349	22.94166491	12.23498743	85.42932011	74.81168375	86.70156176	TRABD2B
ENSG00000270504	1.634270945	3.88E-11	3.07E-10	79.23317677	40.89601135	40.78329144	184.4909785	159.9819083	153.0547978	AL391422.3
ENSG00000124549	1.00570944	4.30E-11	3.39E-10	154.1834791	152.6119448	159.0548366	279.0085242	357.945133	300.8013367	BTN2A3P
ENSG00000198932	1.782444203	5.25E-11	4.10E-10	39.61658838	38.90108397	35.68538001	91.79107799	168.0385512	134.4758917	GPRASP1
ENSG00000188488	-1.03914739	5.75E-11	4.46E-10	279.4575559	286.2720795	248.7780778	125.4175125	123.1515409	146.8618291	SERPINA5
ENSG00000255248	-1.148628827	6.33E-11	4.90E-10	3202.519348	2946.507745	3140.313441	1235.089851	1728.725369	1228.861932	MIR100HG
ENSG00000196747	2.635367692	6.45E-11	4.98E-10	10.70718605	9.974636916	7.137076002	59.07346603	54.0946021	59.27555753	HIST1H2AI
ENSG00000282988	2.207891422	6.85E-11	5.27E-10	14.99006047	17.95434645	15.29373429	63.6175788	78.26453069	81.39330288	AL031777.3
ENSG00000102057	1.768562462	7.56E-11	5.79E-10	28.90940233	45.88332981	46.90078516	114.5116418	185.3027859	117.6664053	KCND1
ENSG00000180998	1.290844951	8.57E-11	6.52E-10	92.08180003	72.81484949	70.35117773	169.0409951	218.6803063	188.4431904	GPR137C
ENSG00000257702	1.238979304	9.01E-11	6.85E-10	69.59670932	99.74636916	91.76240574	224.4791709	187.6046839	204.367967	LBX2-AS1
ENSG00000234476	1.353695781	9.70E-11	7.35E-10	58.88952327	75.80724056	68.31201316	157.2263019	203.7179696	160.1324763	AC092811.1
ENSG00000177494	-2.742198529	1.03E-10	7.76E-10	48.18233722	68.82499472	61.17493716	6.36175788	14.96233675	6.192968697	ZBED2
ENSG00000138449	1.186455761	1.12E-10	8.43E-10	114.5668907	80.79455902	94.8211526	238.1115092	218.6803063	202.5985474	SLC40A1
ENSG00000057657	1.56880554	1.18E-10	8.89E-10	52.46521164	37.90362028	51.99869659	119.0557546	171.4913981	132.7064721	PRDM1
ENSG00000163328	1.131281007	1.18E-10	8.89E-10	93.15251863	99.74636916	89.72324117	206.3027198	210.6236635	202.5985474	GPR155
ENSG00000189184	3.288482195	1.24E-10	9.26E-10	5.353593025	5.984782149	2.039164572	40.89701495	43.73606127	46.00491032	PCDH18
ENSG00000188766	1.24825956	1.27E-10	9.53E-10	86.728207	82.7894864	65.2532663	174.4939304	196.8122757	186.6737707	SPRED3
ENSG00000163064	1.941990727	1.29E-10	9.66E-10	23.55580931	31.91883813	18.35248115	109.0587065	80.56642865	93.77924027	EN1
ENSG00000166963	2.893638079	1.32E-10	9.83E-10	32.12155815	45.88332981	28.54830401	149.9557215	347.5865922	295.4930778	MAP1A
ENSG00000260244	1.537426998	1.37E-10	1.02E-09	38.54586978	42.89093874	51.99869659	141.7763185	115.0948981	130.0523426	AC104083.1
ENSG00000206337	1.405667143	1.59E-10	1.17E-09	49.25305583	56.85543042	65.2532663	159.043947	163.4347553	132.7064721	HCP5
ENSG00000104081	2.321171901	1.74E-10	1.28E-09	16.06077907	13.96449168	11.21540515	79.97638478	55.24555108	69.8920753	BMF
ENSG00000248690	1.584599981	1.98E-10	1.45E-09	43.8994628	42.89093874	35.68538001	105.4234163	141.5667246	121.2052445	HAS2-AS1
ENSG00000135744	4.915806505	1.99E-10	1.46E-09	0	1.994927383	1.019582286	19.9940962	41.43416331	31.8495533	AGT
ENSG00000167525	1.303287151	1.99E-10	1.46E-09	79.23317677	89.77173224	71.37076002	162.6792372	241.699286	191.0973198	PROCA1
ENSG00000125657	-1.002819954	2.11E-10	1.54E-09	255.9017466	278.29237	313.0117618	156.3174793	132.3591328	133.5911819	TNFSF9
ENSG00000120833	-1.231382434	2.32E-10	1.68E-09	291.2354606	271.3101241	256.9347361	107.2410614	159.9819083	84.93214214	SOCS2
ENSG00000135625	-2.859557008	2.40E-10	1.74E-09	52.46521164	51.86811196	42.82245601	9.088225544	5.754744904	5.308258883	EGR4
ENSG00000268879	3.21176859	2.41E-10	1.75E-09	1.070718605	6.982245841	8.156658288	67.25286902	47.18890821	37.15781218	IGFL1P1
ENSG00000046653	1.668356778	2.79E-10	2.00E-09	63.17239769	54.86050304	59.13577259	116.329287	269.3220615	179.5960922	GPM6B
ENSG00000163739	-3.111163775	2.94E-10	2.11E-09	43.8994628	47.8782572	47.92036744	9.088225544	1.150948981	5.308258883	CXCL1
ENSG00000273270	1.33436932	3.39E-10	2.42E-09	58.88952327	89.77173224	68.31201316	169.0409951	215.2274594	165.4407352	AC090114.2
ENSG00000168779	1.466320328	3.42E-10	2.44E-09	57.81880467	52.86557565	54.03786116	115.4204644	180.69899	160.1324763	SHOX2
ENSG00000136531	4.914467738	3.44E-10	2.45E-09	1.070718605	0.997463692	2.039164572	12.72351576	75.96263273	36.27310237	SCN2A
ENSG00000115718	1.551115009	4.01E-10	2.84E-09	48.18233722	33.91376551	42.82245601	119.9645772	109.3401532	135.3606015	PROC
ENSG00000165171	-1.09051522	4.33E-10	3.06E-09	229.1337815	267.3202693	207.9947863	117.2381095	115.0948981	99.08749916	METTL27
ENSG00000115009	-2.978609038	4.60E-10	3.24E-09	40.68730699	54.86050304	42.82245601	3.635290217	8.056642865	6.192968697	CCL20
ENSG00000168939	1.477500646	4.98E-10	3.50E-09	63.17239769	69.82245841	36.7049623	139.9586734	174.9442451	158.3630567	SPRY3
ENSG00000157765	1.175393946	5.26E-10	3.68E-09	70.66742793	105.7311513	106.0365577	219.0262356	218.6803063	201.7138376	SLC34A2
ENSG00000275160	1.143863917	5.45E-10	3.81E-09	91.01108142	110.7184698	140.7023555	242.655622	290.0391432	226.4857124	AL354718.1
ENSG00000133169	6.767007892	5.55E-10	3.87E-09	1.070718605	0.997463692	0	0	113.9439491	110.5887267	BEX1
ENSG00000279278	1.189559991	5.59E-10	3.90E-09	81.37461398	93.76158701	123.3694566	208.1203649	263.5673166	211.4456455	AC245060.6
ENSG00000233822	1.535937034	5.77E-10	4.02E-09	47.11161862	33.91376551	48.93994973	109.0587065	126.6043879	140.6688604	HIST1H2BN
ENSG00000125966	-1.197346503	6.54E-10	4.53E-09	200.2243791	191.5130288	179.4464823	69.07051413	100.1325613	81.39330288	MMP24
ENSG00000180638	1.970447203	7.35E-10	5.06E-09	14.99006047	28.92644706	22.43081029	79.06756223	105.8873062	76.96975381	SLC47A2
ENSG00000005108	3.091212107	7.96E-10	5.45E-09	22.4850907	26.93151967	14.274152	98.15283587	238.246439	207.0220965	THSD7A
ENSG00000260942	1.064733464	8.11E-10	5.56E-09	96.36467445	100.7438328	122.3498743	230.8409288	225.5860002	212.3303553	CAPN10-AS1
ENSG00000163536	1.538103484	9.38E-10	6.38E-09	32.12155815	44.88586612	58.1161903	113.6028193	139.2648267	140.6688604	SERPINI1
ENSG00000184867	2.347278602	1.04E-09	7.04E-09	19.27293489	12.96702799	11.21540515	46.34995027	94.37781642	80.50859307	ARMCX2
ENSG00000247381	2.484644896	1.05E-09	7.12E-09	10.70718605	6.982245841	12.23498743	61.7999337	48.33985719	56.62142809	PLUT
ENSG00000272088	2.095870881	1.14E-09	7.67E-09	13.91934186	19.94927383	15.29373429	71.79698179	78.26453069	61.04497716	AL512413.1
ENSG00000228983	6.095433139	1.30E-09	8.72E-09	0	0.997463692	0	20.90291875	40.28321433	15.04006684	SLC47A1P1
ENSG00000254290	2.00612028	1.49E-09	9.94E-09	12.84862326	26.93151967	19.37206343	90.88225544	75.96263273	71.66149493	AC124067.4
ENSG00000101384	-1.059983553	1.66E-09	1.10E-08	1606.077907	1536.094085	1610.940012	662.5316421	944.9291132	675.033588	JAG1
ENSG00000130701	1.215208146	1.68E-09	1.11E-08	58.88952327	86.77934117	89.72324117	183.582156	191.0575308	173.4031235	RBBP8NL
ENSG00000254198	-1.793042336	1.91E-09	1.26E-08	89.94036282	98.74890547	115.2127983	19.08527364	42.58511229	27.42600423	AC113191.1
ENSG00000160323	1.138095511	1.95E-09	1.29E-08	101.7182675	110.7184698	84.62532974	216.2997679	255.5106737	184.0196413	ADAMTS13
ENSG00000211451	1.739620019	1.97E-09	1.30E-08	27.83868373	21.94420121	32.62663315	90.88225544	102.4344593	82.27801269	GNRHR2
ENSG00000180537	-2.37027679	2.00E-09	1.31E-08	74.95030235	57.85289411	58.1161903	18.17645109	12.66043879	6.192968697	RNF182
ENSG00000112293	1.477572812	2.00E-09	1.32E-08	42.8287442	37.90362028	47.92036744	102.6969486	126.6043879	129.1676328	GPLD1
ENSG00000167757	1.099196316	2.11E-09	1.38E-08	92.08180003	96.75397808	102.9778109	231.7497514	216.3784084	177.8266726	KLK11
ENSG00000196361	6.567931507	2.21E-09	1.45E-08	1.070718605	0	1.019582286	0	105.8873062	90.24040102	ELAVL3
ENSG00000119636	2.03761073	2.26E-09	1.48E-08	20.34365349	13.96449168	18.35248115	59.98228859	82.86832662	73.43091455	BBOF1
ENSG00000119938	1.146135526	2.48E-09	1.61E-08	76.02102095	97.75144177	96.86031717	199.940962	227.8878982	173.4031235	PPP1R3C
ENSG00000105516	1.497508608	2.58E-09	1.67E-08	38.54586978	46.8807935	41.80287373	126.3263351	136.9629287	97.31807953	DBP
ENSG00000055118	-1.523825075	3.11E-09	2.00E-08	155.2541977	169.5688276	169.2506595	29.99114429	75.96263273	67.23794586	KCNH2
ENSG00000279970	1.176973233	3.35E-09	2.14E-08	66.38455351	71.81738579	87.6840766	176.3115755	174.9442451	160.1324763	AC023024.2
ENSG00000228526	1.143086894	3.35E-09	2.15E-08	82.44533258	89.77173224	79.52741831	196.3056717	202.5670206	158.3630567	MIR34AHG
ENSG00000144642	1.793751095	3.43E-09	2.19E-08	29.98012094	28.92644706	26.50913944	76.34109457	134.6610308	86.70156176	RBMS3
ENSG00000012124	1.026617925	3.42E-09	2.19E-08	127.415514	112.7133971	139.6827732	219.0262356	302.6995819	253.9117166	CD22
ENSG00000273038	1.190653919	3.45E-09	2.20E-08	77.09173956	69.82245841	81.56658288	150.864544	200.2651227	171.6337039	AL365203.2
ENSG00000232354	1.710874104	3.48E-09	2.22E-08	25.69724652	58.8503578	28.54830401	108.149884	143.8686226	120.3205347	VIPR1-AS1
ENSG00000207652	-1.144447214	3.51E-09	2.24E-08	179.8807256	206.4749842	215.1318623	88.15578777	111.6420511	74.31562437	MIR621
ENSG00000126709	1.009107229	3.86E-09	2.45E-08	108.1425791	127.6753525	108.0757223	230.8409288	254.3597248	208.7915161	IFI6
ENSG00000120327	2.291068003	3.92E-09	2.49E-08	10.70718605	16.95688276	9.176240574	49.07641794	65.6040919	66.35323604	PCDHB14
ENSG00000277462	-1.103904641	3.98E-09	2.52E-08	206.6486908	197.4978109	267.1305589	93.6087231	122.000592	98.20278934	ZNF670
ENSG00000238178	-1.132371598	4.44E-09	2.80E-08	251.6188722	276.2974426	210.0339509	99.97048098	147.3214695	92.00982065	AC078993.1
ENSG00000128965	-1.239512183	4.59E-09	2.89E-08	135.9812628	208.4699115	189.6423052	73.6146269	81.71737764	71.66149493	CHAC1
ENSG00000242732	1.543092547	4.64E-09	2.92E-08	35.33371396	30.92137444	40.78329144	103.6057712	115.0948981	93.77924027	RTL5
ENSG00000179240	1.096846414	4.96E-09	3.11E-08	116.7083279	96.75397808	150.8981783	244.4732671	308.4543268	228.255132	GVQW3
ENSG00000157111	-2.832181903	5.09E-09	3.19E-08	48.18233722	50.87064827	40.78329144	1.817645109	10.35854083	7.962388325	TMEM171
ENSG00000215808	1.082398008	5.20E-09	3.25E-08	122.061921	90.76919593	137.6436086	215.3909454	285.4353472	242.410489	LINC01139
ENSG00000197380	2.565101118	5.52E-09	3.44E-08	10.70718605	7.979709533	6.117493716	40.89701495	50.64175515	54.85200846	DACT3
ENSG00000134864	-1.389498626	5.52E-09	3.44E-08	157.3956349	152.6119448	123.3694566	69.97933669	39.13226535	54.85200846	GGACT
ENSG00000259172	1.285052445	5.68E-09	3.53E-08	83.51605119	49.87318458	68.31201316	183.582156	149.6233675	156.5936371	AC023024.1
ENSG00000169031	-2.471273464	5.93E-09	3.68E-08	55.67736746	67.82753103	37.72454458	8.179402989	10.35854083	10.61651777	COL4A3
ENSG00000262769	2.811343349	5.95E-09	3.69E-08	9.636467445	3.989854766	5.09791143	44.53230516	47.18890821	38.92723181	AC025627.1
ENSG00000120049	1.614335926	6.19E-09	3.83E-08	34.26299536	29.92391075	37.72454458	94.51754565	131.2081838	87.58627158	KCNIP2
ENSG00000267922	5.107747419	6.35E-09	3.92E-08	2.14143721	0	0	22.72056386	21.86803063	26.54129442	AC007785.1
ENSG00000185519	-1.201965917	6.45E-09	3.99E-08	155.2541977	192.5104925	173.3289886	86.33814266	81.71737764	59.27555753	FAM131C
ENSG00000169507	1.818244582	6.50E-09	4.01E-08	21.4143721	20.94673752	21.41122801	75.43227201	71.35883681	77.85446362	SLC38A11
ENSG00000213928	1.29284699	8.23E-09	5.03E-08	56.74808606	48.87572089	56.07702573	131.7792704	142.7176736	122.0899543	IRF9
ENSG00000121904	1.630988046	8.38E-09	5.13E-08	41.75802559	37.90362028	47.92036744	87.24696522	184.1518369	125.6287936	CSMD2
ENSG00000061455	1.157798798	8.62E-09	5.26E-08	65.3138349	80.79455902	78.50783602	175.402753	178.397092	148.6312487	PRDM6
ENSG00000186204	1.432251407	9.38E-09	5.71E-08	37.47515117	42.89093874	46.90078516	102.6969486	132.3591328	109.7040169	CYP4F12
ENSG00000272031	1.530115376	9.85E-09	5.98E-08	32.12155815	39.89854766	32.62663315	94.51754565	115.0948981	93.77924027	ANKRD34A
ENSG00000084734	1.155994208	9.92E-09	6.02E-08	68.52599072	73.81231318	97.87989946	186.3086236	189.9065818	160.1324763	GCKR
ENSG00000084453	2.600238136	1.02E-08	6.20E-08	7.495030235	7.979709533	7.137076002	38.17054728	55.24555108	44.2354907	SLCO1A2
ENSG00000197301	-1.36148004	1.11E-08	6.70E-08	109.2132977	169.5688276	194.7402166	58.16464348	65.6040919	61.04497716	AC090673.1
ENSG00000080947	1.054293796	1.12E-08	6.76E-08	81.37461398	95.75651439	86.66449431	180.8556883	185.3027859	182.2502217	CROCCP3
ENSG00000187653	-1.17175762	1.14E-08	6.89E-08	145.6177303	175.5536097	153.9569252	62.70875625	78.26453069	70.77678511	TMSB4XP8
ENSG00000163734	-1.881425187	1.15E-08	6.91E-08	66.38455351	63.83767626	79.52741831	19.9940962	17.26423471	19.46361591	CXCL3
ENSG00000205593	1.035207209	1.26E-08	7.53E-08	127.415514	126.6778888	111.1344692	262.6497182	292.3410411	195.5208689	DENND6B
ENSG00000230074	1.132699315	1.29E-08	7.71E-08	79.23317677	88.77426855	70.35117773	174.4939304	195.6613267	153.9395076	AL162231.2
ENSG00000223652	1.860201433	1.32E-08	7.87E-08	17.13149768	17.95434645	26.50913944	83.611675	74.81168375	65.46852623	AC106786.1
ENSG00000123453	1.546271334	1.50E-08	8.92E-08	35.33371396	25.93405598	38.74412687	95.42636821	104.7363573	92.00982065	SARDH
ENSG00000180592	1.921753916	1.55E-08	9.17E-08	29.98012094	39.89854766	9.176240574	103.6057712	97.83066337	98.20278934	SKIDA1
ENSG00000182791	1.721517292	1.60E-08	9.46E-08	22.4850907	26.93151967	22.43081029	82.70285245	84.0192756	70.77678511	CCDC87
ENSG00000268001	1.054840813	1.69E-08	9.93E-08	92.08180003	92.76412332	116.2323806	200.8497845	241.699286	184.9043511	CARD8-AS1
ENSG00000171658	1.092209932	2.19E-08	1.27E-07	94.22323724	76.80470425	76.46867145	171.7674628	194.5103778	161.9018959	NMRAL2P
ENSG00000196167	2.927873061	2.20E-08	1.28E-07	4.28287442	5.984782149	4.078329144	36.35290217	36.83036738	36.27310237	COLCA1
ENSG00000149489	1.048121681	2.24E-08	1.30E-07	111.3547349	85.78187748	94.8211526	185.3998011	187.6046839	229.1398418	ROM1
ENSG00000185046	1.580723815	2.26E-08	1.31E-07	27.83868373	34.91122921	29.56788629	77.24991712	102.4344593	97.31807953	ANKS1B
ENSG00000251141	2.476031632	2.27E-08	1.32E-07	6.42431163	7.979709533	11.21540515	49.98524049	55.24555108	38.042522	MRPS30-DT
ENSG00000235092	1.293019452	2.32E-08	1.34E-07	48.18233722	51.86811196	47.92036744	125.4175125	124.3024899	113.2428562	ID2-AS1
ENSG00000139597	1.018237241	2.37E-08	1.37E-07	103.8597047	84.78441378	93.80157031	200.8497845	186.4537349	184.0196413	N4BP2L1
ENSG00000240240	2.960787923	2.61E-08	1.51E-07	4.28287442	8.977173224	3.058746858	35.44407962	62.15124496	30.96484349	BX664727.3
ENSG00000257698	1.226891661	2.66E-08	1.53E-07	61.03096048	54.86050304	56.07702573	129.0528027	148.4724185	125.6287936	AC084033.3
ENSG00000224875	2.26570125	2.89E-08	1.66E-07	10.70718605	7.979709533	18.35248115	68.16169158	67.90598987	42.46607107	AC083949.1
ENSG00000246777	2.529522266	3.03E-08	1.73E-07	12.84862326	4.987318458	7.137076002	53.62053071	36.83036738	52.19787902	AC044802.1
ENSG00000136367	1.784967781	3.02E-08	1.73E-07	27.83868373	14.96195537	29.56788629	82.70285245	97.83066337	69.00736549	ZFHX2
ENSG00000164100	5.779755619	3.36E-08	1.92E-07	0	0.997463692	1.019582286	1.817645109	59.849347	51.31316921	NDST3
ENSG00000204584	-1.530936856	3.39E-08	1.93E-07	86.728207	120.6931067	90.74282345	28.17349918	40.28321433	35.38839256	AC027801.1
ENSG00000076356	1.005336498	3.55E-08	2.02E-07	97.43539305	93.76158701	93.80157031	179.0380432	212.9255614	181.3655119	PLXNA2
ENSG00000108984	1.289845589	3.61E-08	2.05E-07	59.96024188	58.8503578	51.99869659	135.4145606	171.4913981	112.3581464	MAP2K6
ENSG00000196605	1.108869172	3.88E-08	2.19E-07	68.52599072	66.83006734	86.66449431	159.043947	158.8309593	161.0171861	ZNF846
ENSG00000118997	2.082595624	3.92E-08	2.21E-07	10.70718605	13.96449168	19.37206343	49.98524049	79.41547967	58.39084772	DNAH7
ENSG00000206530	1.060990217	4.10E-08	2.31E-07	130.6276698	88.77426855	92.78198803	195.3968492	252.0578268	204.367967	CFAP44
ENSG00000104967	3.189172213	4.19E-08	2.35E-07	1.070718605	7.979709533	5.09791143	20.90291875	63.30219394	46.88962014	NOVA2
ENSG00000225302	1.445527531	4.48E-08	2.51E-07	40.68730699	50.87064827	44.86162058	99.97048098	166.8876022	107.0498875	NA
ENSG00000225792	1.930399813	4.54E-08	2.54E-07	19.27293489	13.96449168	28.54830401	104.5145938	71.35883681	59.27555753	AC004540.2
ENSG00000088899	1.192636324	4.79E-08	2.68E-07	76.02102095	93.76158701	68.31201316	137.2322057	218.6803063	190.21261	LZTS3
ENSG00000282021	1.746841891	4.84E-08	2.71E-07	36.40443257	21.94420121	19.37206343	89.97343288	103.5854083	67.23794586	AC100810.3
ENSG00000269906	-1.775028291	5.47E-08	3.04E-07	72.80886514	76.80470425	77.48825374	15.44998342	19.56613267	30.96484349	AL606834.1
ENSG00000188153	1.083782788	5.51E-08	3.06E-07	72.80886514	72.81484949	85.64491202	173.5851079	170.3404492	146.8618291	COL4A5
ENSG00000247157	2.045073114	5.53E-08	3.07E-07	10.70718605	12.96702799	17.33289886	54.52935326	57.54744904	57.5061379	LINC01252
ENSG00000276672	-1.580897071	5.54E-08	3.08E-07	101.7182675	78.79963163	105.0169755	27.26467663	43.73606127	25.6565846	AL161891.1
ENSG00000078804	1.03007248	5.71E-08	3.16E-07	111.3547349	102.7387602	107.05614	177.2203981	269.3220615	211.4456455	TP53INP2
ENSG00000124785	1.134579259	5.87E-08	3.25E-07	72.80886514	75.80724056	86.66449431	135.4145606	191.0575308	191.0973198	NRN1
ENSG00000143867	1.577391997	6.43E-08	3.54E-07	26.76796512	42.89093874	25.48955715	109.9675291	93.22686744	81.39330288	OSR1
ENSG00000011332	1.125442391	6.48E-08	3.56E-07	89.94036282	88.77426855	59.13577259	169.0409951	157.6800104	191.0973198	DPF1
ENSG00000257497	-1.91388905	6.63E-08	3.64E-07	59.96024188	56.85543042	94.8211526	14.54116087	19.56613267	22.11774535	AC121761.1
ENSG00000262655	1.289351812	7.50E-08	4.11E-07	65.3138349	57.85289411	50.9791143	139.0498508	178.397092	109.7040169	SPON1
ENSG00000225206	5.028977306	7.81E-08	4.26E-07	0	1.994927383	0	12.72351576	33.37752044	21.23303553	MIR137HG
ENSG00000168306	1.295429328	8.23E-08	4.47E-07	40.68730699	58.8503578	48.93994973	112.6939967	139.2648267	114.127566	ACOX2
ENSG00000138639	1.703671619	8.36E-08	4.53E-07	20.34365349	21.94420121	29.56788629	85.42932011	87.47212254	61.92968697	ARHGAP24
ENSG00000278291	-1.25530578	8.39E-08	4.54E-07	123.1326396	108.7235424	115.2127983	49.07641794	49.49080617	46.88962014	AL161772.1
ENSG00000172955	3.539682475	9.13E-08	4.92E-07	2.14143721	2.992391075	2.039164572	20.90291875	35.6794184	27.42600423	ADH6
ENSG00000198443	1.775374692	9.43E-08	5.06E-07	25.69724652	17.95434645	25.48955715	72.70580435	104.7363573	60.16026735	KRTAP4-1
ENSG00000255031	1.246924537	9.68E-08	5.19E-07	58.88952327	48.87572089	50.9791143	119.0557546	146.1705206	112.3581464	AP002807.1
ENSG00000168824	1.223156091	9.73E-08	5.21E-07	58.88952327	57.85289411	63.21410173	110.8763516	143.8686226	165.4407352	NSG1
ENSG00000168685	-1.592050399	9.80E-08	5.25E-07	72.80886514	103.7362239	80.54700059	31.8087894	21.86803063	30.96484349	IL7R
ENSG00000134198	-1.208326961	1.02E-07	5.47E-07	148.8298861	122.6880341	157.015672	48.16759538	73.66073477	64.58381642	TSPAN2
ENSG00000272142	1.992043132	1.14E-07	6.07E-07	8.56574884	24.93659229	14.274152	66.34404647	61.00029598	63.6991066	AL359643.3
ENSG00000275713	1.695794049	1.18E-07	6.27E-07	20.34365349	17.95434645	34.66579772	79.97638478	85.17022458	71.66149493	HIST1H2BH
ENSG00000237188	1.175672174	1.19E-07	6.31E-07	65.3138349	63.83767626	55.05744344	148.1380764	151.9252655	116.7816954	AC242426.2
ENSG00000000971	1.062157222	1.28E-07	6.73E-07	86.728207	102.7387602	75.44908916	172.6762853	219.8312553	162.7866058	CFH
ENSG00000135253	-1.287516335	1.30E-07	6.86E-07	109.2132977	121.6905704	115.2127983	58.16464348	42.58511229	40.69665144	KCP
ENSG00000227449	2.059079691	1.41E-07	7.40E-07	18.20221628	9.974636916	11.21540515	60.89111114	52.94365312	49.54374958	FGF7P6
ENSG00000156427	3.728357128	1.53E-07	7.99E-07	2.14143721	3.989854766	1.019582286	12.72351576	49.49080617	33.61897293	FGF18
ENSG00000121797	1.300939424	1.53E-07	7.99E-07	51.39449304	52.86557565	37.72454458	123.5998674	127.7553369	99.08749916	CCRL2
ENSG00000246174	1.034807359	1.68E-07	8.73E-07	68.52599072	81.79202271	83.60574745	155.4086568	169.1895002	155.7089272	KCTD21-AS1
ENSG00000280182	1.853267255	1.87E-07	9.65E-07	21.4143721	19.94927383	13.25456972	49.98524049	75.96263273	71.66149493	AC131888.1
ENSG00000278771	1.103050105	1.99E-07	1.03E-06	79.23317677	69.82245841	102.9778109	215.3909454	148.4724185	176.057253	RN7SL3
ENSG00000168269	-2.545602008	2.35E-07	1.20E-06	36.40443257	49.87318458	44.86162058	1.817645109	10.35854083	10.61651777	FOXI1
ENSG00000091262	1.059347237	2.40E-07	1.23E-06	67.45527211	79.79709533	83.60574745	157.2263019	184.1518369	141.5535702	ABCC6
ENSG00000145506	1.091591806	2.44E-07	1.25E-06	65.3138349	66.83006734	76.46867145	151.7733666	165.7366532	128.282923	NKD2
ENSG00000238271	1.151633611	2.59E-07	1.32E-06	54.60664885	76.80470425	90.74282345	139.0498508	195.6613267	161.0171861	IFNWP19
ENSG00000149926	3.327983299	2.61E-07	1.33E-06	3.212155815	2.992391075	6.117493716	11.81469321	66.75504089	46.00491032	FAM57B
ENSG00000126562	-1.380438225	2.75E-07	1.40E-06	96.36467445	94.7590507	91.76240574	32.71761196	31.07562248	44.2354907	WNK4
ENSG00000226652	-2.602364415	2.78E-07	1.41E-06	26.76796512	44.88586612	39.76370915	7.270580435	5.754744904	5.308258883	PSMD10P2
ENSG00000172201	1.835816136	2.82E-07	1.43E-06	22.4850907	26.93151967	29.56788629	49.98524049	142.7176736	91.12511083	ID4
ENSG00000185245	-1.696040285	2.91E-07	1.47E-06	76.02102095	56.85543042	70.35117773	24.53820897	18.41518369	19.46361591	GP1BA
ENSG00000100100	1.380656314	3.09E-07	1.56E-06	59.96024188	39.89854766	29.56788629	102.6969486	109.3401532	123.8593739	PIK3IP1
ENSG00000263731	-1.478446855	3.12E-07	1.57E-06	96.36467445	100.7438328	81.56658288	39.07936984	20.71708165	38.92723181	AC145207.5
ENSG00000271270	1.621560594	3.37E-07	1.69E-06	35.33371396	26.93151967	18.35248115	69.07051413	102.4344593	76.96975381	TMCC1-AS1
ENSG00000155792	1.498168005	3.44E-07	1.72E-06	46.04090001	21.94420121	33.64621544	107.2410614	96.67971439	82.27801269	DEPTOR
ENSG00000107282	3.38702435	3.81E-07	1.89E-06	3.212155815	0.997463692	4.078329144	17.26762853	40.28321433	29.19542386	APBA1
ENSG00000008517	1.164418029	3.85E-07	1.91E-06	48.18233722	70.8199221	58.1161903	133.5969155	147.3214695	117.6664053	IL32
ENSG00000102230	1.149329813	3.94E-07	1.95E-06	58.88952327	75.80724056	60.15535487	139.0498508	174.9442451	120.3205347	PCYT1B
ENSG00000165887	-1.608665496	4.10E-07	2.02E-06	76.02102095	62.84021257	89.72324117	29.08232174	27.62277554	18.57890609	ANKRD2
ENSG00000171004	4.980210719	4.28E-07	2.11E-06	1.070718605	0.997463692	1.019582286	1.817645109	47.18890821	48.65903977	HS6ST2
ENSG00000100060	-1.789175739	4.37E-07	2.15E-06	59.96024188	95.75651439	57.09660802	22.72056386	25.32087758	14.15535702	MFNG
ENSG00000162490	4.479648079	4.39E-07	2.16E-06	1.070718605	0.997463692	1.019582286	8.179402989	29.9246735	30.96484349	DRAXIN
ENSG00000159712	2.407279286	4.43E-07	2.17E-06	7.495030235	10.97210061	4.078329144	39.07936984	39.13226535	41.58136125	ANKRD18CP
ENSG00000233221	-2.743814121	4.53E-07	2.21E-06	35.33371396	29.92391075	32.62663315	6.36175788	5.754744904	2.654129442	AC133785.1
ENSG00000160766	1.091477617	4.84E-07	2.36E-06	58.88952327	74.80977687	59.13577259	143.5939636	141.5667246	126.5135034	GBAP1
ENSG00000277945	-2.580363388	4.87E-07	2.37E-06	43.8994628	44.88586612	29.56788629	2.726467663	11.50948981	6.192968697	AC107308.1
ENSG00000167100	4.444389404	4.91E-07	2.39E-06	2.14143721	0.997463692	1.019582286	4.544112772	49.49080617	36.27310237	SAMD14
ENSG00000102098	1.021163933	5.03E-07	2.45E-06	78.16245816	71.81738579	75.44908916	148.1380764	171.4913981	138.8994408	SCML2
ENSG00000084710	1.414736631	5.29E-07	2.57E-06	48.18233722	40.89601135	35.68538001	79.97638478	149.6233675	104.395758	EFR3B
ENSG00000109705	1.570334941	5.31E-07	2.58E-06	16.06077907	35.9086929	29.56788629	79.97638478	77.11358171	85.81685195	NKX3-2
ENSG00000173825	1.347392543	5.48E-07	2.65E-06	48.18233722	38.90108397	30.58746858	91.79107799	115.0948981	92.89453046	TIGD3
ENSG00000204261	1.1231608	5.47E-07	2.65E-06	77.09173956	57.85289411	59.13577259	149.9557215	155.3781124	117.6664053	PSMB8-AS1
ENSG00000183287	-1.186079765	5.85E-07	2.82E-06	129.5569512	121.6905704	139.6827732	57.25582092	73.66073477	42.46607107	CCBE1
ENSG00000247095	1.420129438	5.90E-07	2.84E-06	34.26299536	35.9086929	26.50913944	79.06756223	98.98161235	81.39330288	MIR210HG
ENSG00000169752	1.390686974	6.02E-07	2.89E-06	38.54586978	47.8782572	30.58746858	87.24696522	130.0572348	91.12511083	NRG4
ENSG00000273382	1.471396753	6.74E-07	3.22E-06	35.33371396	33.91376551	20.39164572	82.70285245	80.56642865	84.93214214	AL356488.3
ENSG00000279518	1.952385765	6.79E-07	3.25E-06	12.84862326	12.96702799	12.23498743	51.8028856	49.49080617	46.00491032	AC083843.4
ENSG00000081052	-1.450899428	6.79E-07	3.25E-06	94.22323724	101.7412965	65.2532663	30.89996685	29.9246735	34.50368274	COL4A4
ENSG00000230002	-1.488821884	6.92E-07	3.30E-06	91.01108142	91.76665963	91.76240574	20.90291875	48.33985719	30.08013367	ALMS1-IT1
ENSG00000233559	-1.161842499	7.03E-07	3.35E-06	161.6785094	115.7057882	138.6631909	76.34109457	59.849347	49.54374958	LINC00513
ENSG00000226690	3.325763052	8.06E-07	3.81E-06	1.070718605	2.992391075	4.078329144	35.44407962	31.07562248	15.92477665	AC013470.2
ENSG00000112964	1.962524318	8.58E-07	4.05E-06	18.20221628	9.974636916	11.21540515	56.34699837	44.88701025	51.31316921	GHR
ENSG00000100583	1.555673444	8.77E-07	4.13E-06	20.34365349	25.93405598	25.48955715	61.7999337	78.26453069	71.66149493	SAMD15
ENSG00000148848	3.639071421	9.31E-07	4.36E-06	11.77790465	3.989854766	8.156658288	39.98819239	145.0195716	112.3581464	ADAM12
ENSG00000227540	1.324095486	9.55E-07	4.46E-06	51.39449304	35.9086929	32.62663315	85.42932011	109.3401532	105.2804679	AC016394.1
ENSG00000128573	1.853020631	9.93E-07	4.63E-06	12.84862326	11.9695643	26.50913944	56.34699837	75.96263273	53.96729865	FOXP2
ENSG00000134516	-1.276329166	1.01E-06	4.71E-06	103.8597047	83.78695009	97.87989946	41.8058375	36.83036738	38.92723181	DOCK2
ENSG00000235890	1.785404068	1.02E-06	4.77E-06	16.06077907	15.95941907	22.43081029	50.89406304	84.0192756	53.96729865	TSPEAR-AS1
ENSG00000260285	1.304769478	1.10E-06	5.10E-06	47.11161862	63.83767626	31.60705087	123.5998674	132.3591328	97.31807953	AL133367.1
ENSG00000278385	1.293141984	1.15E-06	5.34E-06	63.17239769	32.91630182	41.80287373	107.2410614	127.7553369	102.6263384	AC121338.2
ENSG00000267796	1.179836898	1.18E-06	5.43E-06	43.8994628	66.83006734	63.21410173	107.2410614	158.8309593	130.0523426	LIN37
ENSG00000227946	1.26093623	1.18E-06	5.44E-06	48.18233722	81.79202271	45.88120287	139.0498508	174.9442451	109.7040169	AC007383.2
ENSG00000214691	1.043289586	1.18E-06	5.45E-06	100.6475489	74.80977687	87.6840766	174.4939304	227.8878982	141.5535702	LINC01913
ENSG00000146233	1.482015418	1.19E-06	5.50E-06	25.69724652	34.91122921	25.48955715	83.611675	94.37781642	63.6991066	CYP39A1
ENSG00000272989	1.794527113	1.20E-06	5.55E-06	16.06077907	15.95941907	14.274152	49.07641794	58.69839802	53.08258883	LINC02012
ENSG00000229619	1.29530981	1.24E-06	5.69E-06	47.11161862	38.90108397	32.62663315	97.24401332	109.3401532	84.93214214	MBNL1-AS1
ENSG00000246640	-1.020754504	1.24E-06	5.69E-06	216.2851582	166.5764365	165.1723303	89.97343288	112.7930001	69.00736549	AC009720.1
ENSG00000272189	-1.508391959	1.29E-06	5.93E-06	79.23317677	62.84021257	94.8211526	22.72056386	35.6794184	25.6565846	AL024508.2
ENSG00000244734	2.146848763	1.30E-06	5.96E-06	10.70718605	19.94927383	15.29373429	41.8058375	119.698694	44.2354907	HBB
ENSG00000150773	1.062611869	1.32E-06	6.05E-06	68.52599072	57.85289411	78.50783602	151.7733666	156.5290614	120.3205347	PIH1D2
ENSG00000166402	-1.065190006	1.34E-06	6.13E-06	122.061921	131.6652073	132.5456972	53.62053071	61.00029598	69.8920753	TUB
ENSG00000154917	1.873522242	1.46E-06	6.66E-06	64.2431163	89.77173224	65.2532663	167.22335	377.5112657	260.1046853	RAB6B
ENSG00000170099	1.326380663	1.48E-06	6.73E-06	29.98012094	36.90615659	55.05744344	87.24696522	105.8873062	113.2428562	SERPINA6
ENSG00000131711	4.080764697	1.52E-06	6.90E-06	117.7790465	124.6829614	95.84073488	425.3289554	2956.787932	2342.711587	MAP1B
ENSG00000184986	1.149829388	1.53E-06	6.94E-06	50.32377443	70.8199221	69.33159545	137.2322057	177.246143	110.5887267	TMEM121
ENSG00000170161	1.007846742	1.56E-06	7.06E-06	92.08180003	121.6905704	82.58616517	159.043947	247.4540309	191.9820296	AL512625.1
ENSG00000266010	2.178028987	1.67E-06	7.54E-06	6.42431163	6.982245841	14.274152	39.98819239	40.28321433	45.12020051	GATA6-AS1
ENSG00000200087	-1.8351625	1.67E-06	7.55E-06	57.81880467	54.86050304	42.82245601	11.81469321	14.96233675	16.80948646	SNORA73B
ENSG00000182732	2.113230548	1.81E-06	8.12E-06	7.495030235	12.96702799	12.23498743	34.53525707	66.75504089	41.58136125	RGS6
ENSG00000198933	1.007751442	1.83E-06	8.23E-06	113.4961721	109.7210061	92.78198803	162.6792372	284.2843983	191.0973198	TBKBP1
ENSG00000171016	1.193928426	1.95E-06	8.70E-06	47.11161862	40.89601135	45.88120287	92.69990054	115.0948981	99.08749916	PYGO1
ENSG00000196260	-1.171132028	2.16E-06	9.61E-06	127.415514	122.6880341	138.6631909	65.43522391	71.35883681	37.15781218	SFTA2
ENSG00000163093	1.187212347	2.19E-06	9.72E-06	49.25305583	42.89093874	50.9791143	110.8763516	126.6043879	89.35569121	BBS5
ENSG00000197405	1.462469236	2.21E-06	9.80E-06	37.47515117	24.93659229	22.43081029	67.25286902	88.62307152	77.85446362	C5AR1
ENSG00000163491	2.012710847	2.29E-06	1.01E-05	5.353593025	12.96702799	23.45039258	47.25877283	71.35883681	51.31316921	NEK10
ENSG00000130518	1.735927062	2.28E-06	1.01E-05	23.55580931	13.96449168	21.41122801	46.34995027	88.62307152	61.92968697	IQCN
ENSG00000250510	1.342865493	2.30E-06	1.02E-05	38.54586978	40.89601135	41.80287373	68.16169158	125.4534389	115.0122758	GPR162
ENSG00000248213	2.23141592	2.55E-06	1.12E-05	8.56574884	8.977173224	7.137076002	46.34995027	41.43416331	28.31071405	CICP16
ENSG00000265817	1.76022608	2.58E-06	1.13E-05	8.56574884	26.93151967	20.39164572	65.43522391	71.35883681	53.96729865	FSBP
ENSG00000161664	1.126440305	2.59E-06	1.13E-05	50.32377443	56.85543042	47.92036744	111.7851742	128.9062858	99.08749916	ASB16
ENSG00000184486	3.075055971	2.59E-06	1.14E-05	2.14143721	0.997463692	6.117493716	24.53820897	24.1699286	29.19542386	POU3F2
ENSG00000277476	1.289297814	2.61E-06	1.14E-05	62.10167909	64.83513995	26.50913944	119.9645772	117.396796	137.1300212	AC005332.6
ENSG00000271824	1.054955632	2.62E-06	1.15E-05	61.03096048	60.84528519	77.48825374	132.6880929	164.5857043	118.5511151	SMIM32
ENSG00000259354	-2.696594241	2.79E-06	1.21E-05	37.47515117	23.9391286	37.72454458	9.997048098	2.301897962	2.654129442	AC025580.2
ENSG00000092607	1.520197235	2.90E-06	1.26E-05	26.76796512	17.95434645	29.56788629	58.16464348	81.71737764	73.43091455	TBX15
ENSG00000002079	-1.249345676	2.91E-06	1.26E-05	102.7889861	94.7590507	97.87989946	51.8028856	42.58511229	30.08013367	MYH16
ENSG00000139971	2.066587056	3.01E-06	1.31E-05	24.62652791	9.974636916	9.176240574	33.62643451	84.0192756	65.46852623	C14orf37
ENSG00000203724	1.015880554	3.08E-06	1.33E-05	78.16245816	54.86050304	79.52741831	129.0528027	147.3214695	153.0547978	C1orf53
ENSG00000233087	3.606491048	3.24E-06	1.40E-05	0	2.992391075	2.039164572	17.26762853	23.01897962	22.11774535	RAB6D
ENSG00000216285	-3.317260572	3.27E-06	1.41E-05	29.98012094	20.94673752	17.33289886	0.908822554	3.452846942	2.654129442	AC078819.1
ENSG00000142494	1.8276254	3.36E-06	1.45E-05	10.70718605	12.96702799	18.35248115	45.44112772	47.18890821	56.62142809	SLC47A1
ENSG00000231711	1.035714209	3.40E-06	1.46E-05	64.2431163	103.7362239	74.42950688	147.2292538	203.7179696	148.6312487	LINC00899
ENSG00000196376	5.218569606	3.56E-06	1.52E-05	1.070718605	0	1.019582286	0.908822554	47.18890821	29.19542386	SLC35F1
ENSG00000186895	1.488088887	3.57E-06	1.53E-05	31.05083954	27.92898336	17.33289886	79.97638478	64.45314292	69.00736549	FGF3
ENSG00000203709	1.077392157	3.59E-06	1.53E-05	58.88952327	51.86811196	53.01827887	119.0557546	124.3024899	102.6263384	MIR29B2CHG
ENSG00000260963	3.457074697	3.67E-06	1.57E-05	2.14143721	3.989854766	0	25.44703152	26.47182656	15.92477665	AC026462.3
ENSG00000197245	2.033707638	3.69E-06	1.58E-05	11.77790465	11.9695643	7.137076002	44.53230516	34.52846942	46.88962014	FAM110D
ENSG00000166341	1.489063517	3.72E-06	1.58E-05	34.26299536	52.86557565	30.58746858	61.7999337	147.3214695	122.9746641	DCHS1
ENSG00000233396	1.463665455	3.73E-06	1.59E-05	26.76796512	20.94673752	31.60705087	63.6175788	88.62307152	67.23794586	LINC01719
ENSG00000106927	1.808206285	3.81E-06	1.62E-05	7.495030235	20.94673752	18.35248115	60.89111114	55.24555108	48.65903977	AMBP
ENSG00000138411	1.150841963	3.93E-06	1.67E-05	39.61658838	57.85289411	48.93994973	94.51754565	112.7930001	118.5511151	HECW2
ENSG00000234498	-1.31138187	3.98E-06	1.69E-05	70.66742793	87.77680486	87.6840766	30.89996685	29.9246735	38.042522	RPL13AP20
ENSG00000261136	1.354752208	4.00E-06	1.70E-05	27.83868373	53.86303935	28.54830401	95.42636821	104.7363573	83.16272251	AC023908.3
ENSG00000151320	3.086496715	4.08E-06	1.73E-05	29.98012094	47.8782572	25.48955715	109.0587065	428.1530208	341.4979882	AKAP6
ENSG00000223813	1.057372607	4.24E-06	1.79E-05	51.39449304	54.86050304	66.27284859	131.7792704	113.9439491	113.2428562	AC007255.1
ENSG00000256751	1.420839194	4.50E-06	1.89E-05	26.76796512	32.91630182	22.43081029	66.34404647	86.32117356	68.12265567	PLBD1-AS1
ENSG00000033122	1.022945939	4.59E-06	1.93E-05	72.80886514	68.82499472	75.44908916	116.329287	184.1518369	142.43828	LRRC7
ENSG00000162614	1.276141842	4.65E-06	1.95E-05	36.40443257	34.91122921	32.62663315	84.52049755	94.37781642	73.43091455	NEXN
ENSG00000078328	4.085532064	4.73E-06	1.98E-05	2.14143721	1.994927383	0	5.452935326	31.07562248	33.61897293	RBFOX1
ENSG00000280367	1.482701793	4.73E-06	1.98E-05	28.90940233	22.94166491	23.45039258	53.62053071	82.86832662	74.31562437	AP002364.1
ENSG00000153237	1.882106698	4.79E-06	2.01E-05	9.636467445	15.95941907	11.21540515	47.25877283	48.33985719	40.69665144	CCDC148
ENSG00000243766	1.509603216	4.86E-06	2.03E-05	35.33371396	19.94927383	19.37206343	80.88520734	63.30219394	67.23794586	HOTTIP
ENSG00000182912	1.312631588	4.85E-06	2.03E-05	41.75802559	34.91122921	39.76370915	76.34109457	131.2081838	83.16272251	TSPEAR-AS2
ENSG00000230359	1.268289252	5.00E-06	2.09E-05	46.04090001	36.90615659	27.52872172	92.69990054	85.17022458	87.58627158	TPI1P2
ENSG00000168062	1.818557872	5.04E-06	2.10E-05	14.99006047	14.96195537	10.19582286	51.8028856	42.58511229	46.88962014	BATF2
ENSG00000196104	4.091242456	5.23E-06	2.18E-05	0	1.994927383	2.039164572	5.452935326	39.13226535	25.6565846	SPOCK3
ENSG00000272760	1.43717693	5.23E-06	2.18E-05	20.34365349	27.92898336	29.56788629	79.97638478	70.20788783	61.04497716	AC093726.1
ENSG00000185250	1.03975293	5.24E-06	2.18E-05	55.67736746	54.86050304	55.05744344	112.6939967	117.396796	110.5887267	PPIL6
ENSG00000173531	1.161559345	5.29E-06	2.20E-05	43.8994628	36.90615659	47.92036744	94.51754565	97.83066337	95.5486599	MST1
ENSG00000275198	1.600218253	5.60E-06	2.32E-05	17.13149768	26.93151967	23.45039258	64.52640136	93.22686744	48.65903977	AL512791.2
ENSG00000166257	7.143238275	6.07E-06	2.51E-05	0	0.997463692	0	10.90587065	86.32117356	59.27555753	SCN3B
ENSG00000175879	1.820946931	6.37E-06	2.62E-05	9.636467445	13.96449168	16.31331658	54.52935326	41.43416331	45.12020051	HOXD8
ENSG00000258708	1.385537072	6.35E-06	2.62E-05	37.47515117	25.93405598	24.46997486	68.16169158	90.92496948	70.77678511	SLC25A21-AS1
ENSG00000198513	1.061287879	6.44E-06	2.65E-05	68.52599072	48.87572089	58.1161903	112.6939967	142.7176736	111.4734366	ATL1
ENSG00000232653	1.558457282	6.57E-06	2.70E-05	20.34365349	18.95181014	19.37206343	54.52935326	65.6040919	53.08258883	GOLGA8N
ENSG00000224520	-1.321312785	6.58E-06	2.70E-05	72.80886514	116.7032519	76.46867145	29.99114429	36.83036738	39.81194163	KRT8P45
ENSG00000131781	1.060641176	6.62E-06	2.72E-05	43.8994628	86.77934117	72.39034231	145.4116087	145.0195716	134.4758917	FMO5
ENSG00000188167	-1.143596115	6.61E-06	2.72E-05	102.7889861	126.6778888	97.87989946	40.89701495	44.88701025	61.92968697	TMPPE
ENSG00000204442	1.52037517	6.80E-06	2.79E-05	12.84862326	27.92898336	37.72454458	73.6146269	82.86832662	69.8920753	FAM155A
ENSG00000108309	2.455612982	7.19E-06	2.94E-05	5.353593025	13.96449168	8.156658288	16.35880598	82.86832662	53.08258883	RUNDC3A
ENSG00000232850	1.148028679	7.24E-06	2.96E-05	40.68730699	40.89601135	61.17493716	94.51754565	107.0382552	115.0122758	PTGES2-AS1
ENSG00000106178	1.885060923	7.51E-06	3.07E-05	19.27293489	7.979709533	12.23498743	50.89406304	57.54744904	37.15781218	CCL24
ENSG00000105419	1.100677949	7.51E-06	3.07E-05	50.32377443	82.7894864	63.21410173	106.3322389	172.6423471	144.2076997	MEIS3
ENSG00000104490	1.696519981	8.09E-06	3.29E-05	24.62652791	28.92644706	8.156658288	54.52935326	80.56642865	65.46852623	NCALD
ENSG00000187187	1.367969696	8.16E-06	3.31E-05	41.75802559	21.94420121	31.60705087	78.15873967	69.05693885	97.31807953	ZNF546
ENSG00000187122	3.912778853	8.19E-06	3.32E-05	2.14143721	0.997463692	2.039164572	3.635290217	42.58511229	31.8495533	SLIT1
ENSG00000251361	-2.962448843	8.29E-06	3.36E-05	22.4850907	25.93405598	20.39164572	2.726467663	4.603795923	1.769419628	AC012625.1
ENSG00000099840	1.772543821	8.38E-06	3.40E-05	11.77790465	22.94166491	12.23498743	64.52640136	39.13226535	56.62142809	IZUMO4
ENSG00000102984	1.010968598	8.51E-06	3.44E-05	51.39449304	77.80216794	63.21410173	116.329287	138.1138777	134.4758917	ZNF821
ENSG00000196275	1.208473336	8.89E-06	3.59E-05	41.75802559	30.92137444	46.90078516	81.79402989	104.7363573	90.24040102	GTF2IRD2
ENSG00000178665	1.128822199	9.36E-06	3.77E-05	40.68730699	44.88586612	54.03786116	88.15578777	117.396796	100.8569188	ZNF713
ENSG00000162738	1.552294621	9.49E-06	3.81E-05	31.05083954	24.93659229	26.50913944	45.44112772	116.2458471	81.39330288	VANGL2
ENSG00000271447	1.388560364	9.66E-06	3.88E-05	23.55580931	24.93659229	30.58746858	69.97933669	58.69839802	77.85446362	MMP28
ENSG00000224417	1.812952463	9.89E-06	3.97E-05	14.99006047	10.97210061	12.23498743	44.53230516	51.79270413	38.042522	AL606970.1
ENSG00000188833	1.046053917	1.02E-05	4.09E-05	51.39449304	54.86050304	56.07702573	96.33519076	126.6043879	113.2428562	ENTPD8
ENSG00000228393	1.266119774	1.03E-05	4.12E-05	31.05083954	38.90108397	28.54830401	72.70580435	85.17022458	79.62388325	LINC01004
ENSG00000154099	2.327104601	1.04E-05	4.14E-05	10.70718605	2.992391075	7.137076002	30.89996685	46.03795923	27.42600423	DNAAF1
ENSG00000187634	1.194715955	1.07E-05	4.27E-05	53.53593025	40.89601135	30.58746858	86.33814266	96.67971439	102.6263384	SAMD11
ENSG00000167552	2.022469571	1.08E-05	4.31E-05	839.4433863	791.9861711	857.4687025	1602.254163	4705.079433	3805.13691	TUBA1A
ENSG00000171798	1.26791084	1.09E-05	4.34E-05	35.33371396	29.92391075	37.72454458	69.07051413	100.1325613	79.62388325	KNDC1
ENSG00000173705	1.539613612	1.10E-05	4.38E-05	17.13149768	18.95181014	22.43081029	60.89111114	61.00029598	48.65903977	SUSD5
ENSG00000224411	-1.228326309	1.19E-05	4.73E-05	84.58676979	87.77680486	89.72324117	28.17349918	49.49080617	35.38839256	HSP90AA2P
ENSG00000262877	1.404704671	1.20E-05	4.74E-05	22.4850907	26.93151967	22.43081029	61.7999337	62.15124496	66.35323604	AC110285.2
ENSG00000139344	1.581268371	1.24E-05	4.89E-05	19.27293489	16.95688276	17.33289886	53.62053071	61.00029598	46.00491032	AMDHD1
ENSG00000282034	-1.31359748	1.24E-05	4.91E-05	71.73814653	83.78695009	110.1148869	39.07936984	44.88701025	23.88716498	AC106886.5
ENSG00000136859	1.540660038	1.25E-05	4.94E-05	137.0519814	81.79202271	67.29243088	252.6526701	345.2846942	234.4481007	ANGPTL2
ENSG00000232630	-1.437455232	1.25E-05	4.94E-05	113.4961721	66.83006734	66.27284859	24.53820897	24.1699286	41.58136125	PRPS1P2
ENSG00000243701	1.11193487	1.25E-05	4.95E-05	65.3138349	36.90615659	48.93994973	105.4234163	117.396796	103.5110482	DUBR
ENSG00000112599	-1.849799074	1.27E-05	5.01E-05	46.04090001	46.8807935	49.95953201	13.63233832	20.71708165	6.192968697	GUCA1B
ENSG00000099937	2.393244695	1.29E-05	5.07E-05	2.14143721	7.979709533	9.176240574	40.89701495	40.28321433	21.23303553	SERPIND1
ENSG00000131409	2.586739759	1.30E-05	5.12E-05	7.495030235	4.987318458	3.058746858	17.26762853	47.18890821	29.19542386	LRRC4B
ENSG00000162896	2.695224434	1.31E-05	5.17E-05	5.353593025	5.984782149	1.019582286	21.8117413	25.32087758	32.73426311	PIGR
ENSG00000175894	1.851596493	1.33E-05	5.22E-05	18.20221628	6.982245841	14.274152	42.71466005	59.849347	39.81194163	TSPEAR
ENSG00000272462	1.062673511	1.33E-05	5.24E-05	49.25305583	59.84782149	61.17493716	139.0498508	125.4534389	92.00982065	U91328.1
ENSG00000145703	1.438295987	1.37E-05	5.39E-05	17.13149768	24.93659229	26.50913944	61.7999337	64.45314292	60.16026735	IQGAP2
ENSG00000230356	-3.161201088	1.42E-05	5.55E-05	33.19227675	11.9695643	23.45039258	4.544112772	1.150948981	1.769419628	NCAPD2P1
ENSG00000129295	1.520375921	1.43E-05	5.58E-05	14.99006047	20.94673752	23.45039258	53.62053071	54.0946021	62.81439679	LRRC6
ENSG00000182916	4.366666758	1.46E-05	5.69E-05	0	0.997463692	2.039164572	2.726467663	29.9246735	30.96484349	TCEAL7
ENSG00000196366	1.40718655	1.47E-05	5.75E-05	31.05083954	26.93151967	21.41122801	55.43817582	88.62307152	67.23794586	C9orf163
ENSG00000172986	1.106023166	1.53E-05	5.98E-05	51.39449304	46.8807935	36.7049623	103.6057712	95.5287654	91.12511083	GXYLT2
ENSG00000152953	3.632194985	1.54E-05	6.00E-05	3.212155815	0	2.039164572	9.997048098	37.98131637	16.80948646	STK32B
ENSG00000196358	2.281080324	1.55E-05	6.04E-05	11.77790465	3.989854766	11.21540515	19.08527364	64.45314292	47.77432995	NTNG2
ENSG00000274414	-1.288053565	1.60E-05	6.20E-05	67.45527211	81.79202271	95.84073488	39.07936984	37.98131637	23.88716498	AL121772.1
ENSG00000163283	-1.263174822	1.61E-05	6.24E-05	91.01108142	64.83513995	77.48825374	34.53525707	34.52846942	28.31071405	ALPP
ENSG00000011052	-1.226657355	1.75E-05	6.77E-05	65.3138349	86.77934117	85.64491202	31.8087894	34.52846942	35.38839256	NME1-NME2
ENSG00000129946	2.318472122	1.78E-05	6.86E-05	16.06077907	5.984782149	4.078329144	21.8117413	66.75504089	41.58136125	SHC2
ENSG00000187017	1.175049106	1.78E-05	6.87E-05	41.75802559	38.90108397	33.64621544	78.15873967	100.1325613	80.50859307	ESPN
ENSG00000175611	1.024033438	1.91E-05	7.33E-05	56.74808606	47.8782572	50.9791143	98.15283587	115.0948981	103.5110482	LINC00476
ENSG00000100628	2.821092734	1.92E-05	7.38E-05	2.14143721	3.989854766	4.078329144	15.44998342	34.52846942	23.00245516	ASB2
ENSG00000261787	1.698244319	1.92E-05	7.38E-05	17.13149768	8.977173224	35.68538001	50.89406304	73.66073477	76.085044	TCF24
ENSG00000145949	1.687384411	1.94E-05	7.45E-05	16.06077907	10.97210061	19.37206343	39.98819239	62.15124496	47.77432995	MYLK4
ENSG00000160179	1.111133903	1.94E-05	7.45E-05	44.97018141	55.85796673	35.68538001	89.06461033	98.98161235	107.0498875	ABCG1
ENSG00000223669	-1.812002768	1.95E-05	7.49E-05	42.8287442	48.87572089	59.13577259	9.997048098	25.32087758	8.847098139	AL357033.2
ENSG00000231683	1.156010752	1.97E-05	7.54E-05	33.19227675	37.90362028	55.05744344	88.15578777	103.5854083	90.24040102	AL033397.1
ENSG00000254815	1.045906085	1.97E-05	7.57E-05	50.32377443	55.85796673	41.80287373	105.4234163	100.1325613	99.97220897	AP006284.1
ENSG00000249853	-1.313402684	1.99E-05	7.63E-05	83.51605119	62.84021257	67.29243088	24.53820897	34.52846942	27.42600423	HS3ST5
ENSG00000272505	1.171185821	2.01E-05	7.69E-05	29.98012094	42.89093874	45.88120287	78.15873967	100.1325613	90.24040102	AC104964.4
ENSG00000080293	2.933396096	2.03E-05	7.77E-05	3.212155815	0	6.117493716	19.9940962	25.32087758	25.6565846	SCTR
ENSG00000119698	1.079870933	2.16E-05	8.25E-05	110.2840163	41.89347505	80.54700059	158.1351245	177.246143	155.7089272	PPP4R4
ENSG00000223392	1.25952526	2.17E-05	8.28E-05	31.05083954	30.92137444	32.62663315	69.07051413	92.07591846	66.35323604	CLDN10-AS1
ENSG00000185634	1.945033173	2.17E-05	8.29E-05	8.56574884	14.96195537	8.156658288	28.17349918	49.49080617	45.12020051	SHC4
ENSG00000203279	1.580212253	2.40E-05	9.10E-05	14.99006047	15.95941907	19.37206343	50.89406304	42.58511229	56.62142809	AL590705.1
ENSG00000283064	2.200309926	2.42E-05	9.18E-05	8.56574884	9.974636916	3.058746858	37.26172473	25.32087758	36.27310237	AL353759.1
ENSG00000249631	-1.826192855	2.47E-05	9.36E-05	205.5779722	160.5916543	221.2493561	44.53230516	88.62307152	33.61897293	AC005699.1
ENSG00000277758	1.460405619	2.49E-05	9.41E-05	23.55580931	14.96195537	26.50913944	57.25582092	67.90598987	53.96729865	FO681492.1
ENSG00000089091	1.276890052	2.57E-05	9.70E-05	32.12155815	32.91630182	33.64621544	67.25286902	107.0382552	66.35323604	DZANK1
ENSG00000183496	1.315970457	2.61E-05	9.83E-05	42.8287442	27.92898336	25.48955715	62.70875625	101.2835103	76.085044	MEX3B
ENSG00000143369	1.166376672	2.61E-05	9.84E-05	47.11161862	41.89347505	42.82245601	78.15873967	133.5100818	85.81685195	ECM1
ENSG00000223298	1.734918745	2.64E-05	9.94E-05	8.56574884	15.95941907	15.29373429	49.07641794	46.03795923	38.042522	RNY3P8
ENSG00000183186	1.035114512	2.69E-05	0.000101136	61.03096048	61.84274888	65.2532663	121.7822223	170.3404492	95.5486599	C2CD4C
ENSG00000143858	2.608166484	2.70E-05	0.000101562	3.212155815	6.982245841	6.117493716	11.81469321	55.24555108	33.61897293	SYT2
ENSG00000237330	-1.261448283	2.77E-05	0.000104036	80.30389537	71.81738579	66.27284859	35.44407962	23.01897962	31.8495533	RNF223
ENSG00000198416	1.132607608	2.80E-05	0.000105165	62.10167909	47.8782572	31.60705087	106.3322389	88.62307152	114.127566	ZNF658B
ENSG00000261324	1.035259094	2.89E-05	0.000108151	71.73814653	53.86303935	57.09660802	113.6028193	162.2838063	99.97220897	AC010168.2
ENSG00000281189	1.345263179	2.90E-05	0.000108617	20.34365349	24.93659229	29.56788629	59.98228859	67.90598987	62.81439679	GHET1
ENSG00000189056	3.620557036	2.95E-05	0.000110223	17.13149768	18.95181014	23.45039258	52.71170815	380.9641126	299.0319171	RELN
ENSG00000126259	1.598024322	3.08E-05	0.000114793	22.4850907	18.95181014	10.19582286	47.25877283	48.33985719	60.16026735	KIRREL2
ENSG00000164675	2.19231722	3.15E-05	0.000117131	9.636467445	3.989854766	7.137076002	37.26172473	33.37752044	23.88716498	IQUB
ENSG00000261068	-1.516349481	3.18E-05	0.000118167	44.97018141	74.80977687	55.05744344	19.08527364	14.96233675	26.54129442	AL512274.1
ENSG00000118432	3.80575836	3.28E-05	0.000121611	6.42431163	7.979709533	3.058746858	20.90291875	125.4534389	98.20278934	CNR1
ENSG00000275591	1.717169001	3.31E-05	0.000122631	16.06077907	16.95688276	8.156658288	43.62348261	39.13226535	52.19787902	XKR5
ENSG00000139899	1.15926508	3.41E-05	0.000126362	37.47515117	50.87064827	37.72454458	97.24401332	115.0948981	70.77678511	CBLN3
ENSG00000206561	1.742461475	3.46E-05	0.000127933	17.13149768	17.95434645	9.176240574	36.35290217	70.20788783	42.46607107	COLQ
ENSG00000180884	1.041127965	3.46E-05	0.000128061	53.53593025	67.82753103	50.9791143	102.6969486	98.98161235	152.170088	ZNF792
ENSG00000267194	2.654770627	3.69E-05	0.000135769	3.212155815	5.984782149	2.039164572	20.90291875	31.07562248	19.46361591	NA
ENSG00000137571	2.597638978	3.72E-05	0.000136915	5.353593025	3.989854766	5.09791143	11.81469321	46.03795923	30.08013367	SLCO5A1
ENSG00000256262	2.844993791	3.81E-05	0.000140275	5.353593025	2.992391075	1.019582286	15.44998342	23.01897962	28.31071405	USP30-AS1
ENSG00000230061	1.174621797	3.92E-05	0.000144112	42.8287442	40.89601135	25.48955715	78.15873967	85.17022458	83.16272251	TRPM2-AS
ENSG00000198774	1.298292579	3.94E-05	0.000144812	31.05083954	21.94420121	26.50913944	59.98228859	69.05693885	66.35323604	RASSF9
ENSG00000222009	-1.837237403	4.02E-05	0.000147445	37.47515117	49.87318458	43.8420383	12.72351576	19.56613267	5.308258883	BTBD19
ENSG00000141668	2.482274553	4.04E-05	0.000148059	3.212155815	2.992391075	12.23498743	19.9940962	57.54744904	26.54129442	CBLN2
ENSG00000181333	1.29439076	4.20E-05	0.000153749	25.69724652	33.91376551	26.50913944	60.89111114	89.7740205	61.92968697	HEPHL1
ENSG00000003096	1.300831499	4.23E-05	0.000154497	29.98012094	36.90615659	50.9791143	57.25582092	126.6043879	107.9345973	KLHL13
ENSG00000122477	1.133924367	4.26E-05	0.000155483	58.88952327	36.90615659	37.72454458	97.24401332	117.396796	78.73917344	LRRC39
ENSG00000103723	2.761945663	4.49E-05	0.00016341	5.353593025	5.984782149	3.058746858	7.270580435	52.94365312	38.042522	AP3B2
ENSG00000240668	-1.379587891	4.55E-05	0.00016587	49.25305583	62.84021257	68.31201316	19.08527364	28.77372452	22.11774535	KRT8P36
ENSG00000225511	1.713339535	4.57E-05	0.000166346	17.13149768	16.95688276	9.176240574	37.26172473	65.6040919	39.81194163	LINC00475
ENSG00000120658	1.75692141	4.65E-05	0.000169124	11.77790465	15.95941907	8.156658288	35.44407962	43.73606127	42.46607107	ENOX1
ENSG00000137460	1.054586996	4.69E-05	0.000170308	48.18233722	41.89347505	47.92036744	104.5145938	104.7363573	77.85446362	FHDC1
ENSG00000133874	1.040925975	4.73E-05	0.00017193	46.04090001	51.86811196	44.86162058	80.88520734	113.9439491	99.97220897	RNF122
ENSG00000101489	6.012210185	4.77E-05	0.000173071	2.14143721	0	0	10.90587065	69.05693885	54.85200846	CELF4
ENSG00000027869	-1.101562643	4.79E-05	0.000173674	77.09173956	95.75651439	108.0757223	48.16759538	32.22657146	49.54374958	SH2D2A
ENSG00000105613	1.028282158	4.95E-05	0.000179182	69.59670932	89.77173224	75.44908916	96.33519076	204.8689186	179.5960922	MAST1
ENSG00000181355	2.361816716	4.97E-05	0.000179836	11.77790465	1.994927383	4.078329144	25.44703152	39.13226535	26.54129442	OFCC1
ENSG00000158887	1.112399768	4.99E-05	0.00018049	51.39449304	47.8782572	35.68538001	81.79402989	125.4534389	85.81685195	MPZ
ENSG00000236914	1.514604195	5.22E-05	0.000188367	22.4850907	13.96449168	17.33289886	54.52935326	57.54744904	41.58136125	LINC01852
ENSG00000139220	3.234325674	5.27E-05	0.000190031	0	2.992391075	4.078329144	9.088225544	40.28321433	18.57890609	PPFIA2
ENSG00000127585	1.785841578	5.34E-05	0.000192326	9.636467445	13.96449168	10.19582286	31.8087894	48.33985719	37.15781218	FBXL16
ENSG00000130943	1.4351512	5.34E-05	0.000192351	33.19227675	22.94166491	17.33289886	51.8028856	90.92496948	56.62142809	PKDREJ
ENSG00000177692	1.459109705	5.70E-05	0.00020418	31.05083954	13.96449168	19.37206343	51.8028856	70.20788783	54.85200846	DNAJC28
ENSG00000120659	-1.713605252	5.80E-05	0.000207653	37.47515117	45.88332981	34.66579772	10.90587065	13.81138777	11.50122758	TNFSF11
ENSG00000167371	1.663195086	5.86E-05	0.000209632	14.99006047	9.974636916	29.56788629	38.17054728	75.96263273	59.27555753	PRRT2
ENSG00000184515	1.230896678	5.87E-05	0.000209824	27.83868373	43.88840243	30.58746858	60.89111114	80.56642865	99.08749916	BEX5
ENSG00000249863	-1.44028579	5.92E-05	0.000211696	51.39449304	48.87572089	61.17493716	17.26762853	16.11328573	25.6565846	AC021106.1
ENSG00000099954	1.281279715	5.95E-05	0.00021237	38.54586978	29.92391075	26.50913944	53.62053071	100.1325613	77.85446362	CECR2
ENSG00000174599	1.685061195	5.98E-05	0.000213594	11.77790465	13.96449168	11.21540515	39.07936984	39.13226535	40.69665144	TRAM1L1
ENSG00000197768	1.441245097	5.99E-05	0.000213882	18.20221628	19.94927383	25.48955715	74.52344946	54.0946021	44.2354907	STPG3
ENSG00000162949	-1.480637267	6.02E-05	0.000214767	52.46521164	48.87572089	46.90078516	21.8117413	16.11328573	15.04006684	CAPN13
ENSG00000270127	1.169648555	6.38E-05	0.000226611	35.33371396	37.90362028	37.72454458	77.24991712	109.3401532	64.58381642	AC027020.2
ENSG00000123570	1.96969774	6.50E-05	0.000230635	8.56574884	8.977173224	10.19582286	20.90291875	49.49080617	38.92723181	RAB9B
ENSG00000267750	2.255881822	6.52E-05	0.000231165	7.495030235	3.989854766	6.117493716	19.9940962	26.47182656	37.15781218	RUNDC3A-AS1
ENSG00000108830	1.272849965	6.54E-05	0.000231755	29.98012094	38.90108397	30.58746858	50.89406304	101.2835103	89.35569121	RND2
ENSG00000105649	1.230392523	6.62E-05	0.000234427	44.97018141	27.92898336	32.62663315	59.98228859	105.8873062	82.27801269	RAB3A
ENSG00000182168	2.826964996	6.86E-05	0.000242368	5.353593025	4.987318458	2.039164572	6.36175788	39.13226535	42.46607107	UNC5C
ENSG00000172159	1.648710086	7.08E-05	0.000249768	12.84862326	23.9391286	14.274152	31.8087894	74.81168375	54.85200846	FRMD3
ENSG00000182667	3.393495281	7.29E-05	0.000256534	2.14143721	1.994927383	3.058746858	2.726467663	46.03795923	27.42600423	NTM
ENSG00000171124	-1.914880169	7.34E-05	0.000258217	34.26299536	51.86811196	34.66579772	8.179402989	19.56613267	5.308258883	FUT3
ENSG00000228570	2.275179608	7.35E-05	0.000258501	4.28287442	3.989854766	8.156658288	21.8117413	33.37752044	24.77187479	NUTM2E
ENSG00000141837	2.513202728	7.45E-05	0.000261657	2.14143721	5.984782149	4.078329144	20.90291875	31.07562248	18.57890609	CACNA1A
ENSG00000100665	-1.176827853	7.78E-05	0.000272269	67.45527211	66.83006734	108.0757223	34.53525707	34.52846942	38.042522	SERPINA4
ENSG00000176490	2.904334454	8.24E-05	0.000287126	5.353593025	1.994927383	3.058746858	7.270580435	46.03795923	24.77187479	DIRAS1
ENSG00000132821	2.696334334	8.33E-05	0.000290024	12.84862326	14.96195537	6.117493716	29.08232174	103.5854083	87.58627158	VSTM2L
ENSG00000152763	1.190791873	8.46E-05	0.000294055	25.69724652	31.91883813	33.64621544	61.7999337	67.90598987	78.73917344	WDR78
ENSG00000164850	1.151966501	8.69E-05	0.000301508	67.45527211	29.92391075	40.78329144	116.329287	110.4911022	79.62388325	GPER1
ENSG00000196110	-1.070054233	8.77E-05	0.000304188	94.22323724	75.80724056	80.54700059	38.17054728	34.52846942	46.00491032	ZNF699
ENSG00000139567	1.458251106	9.19E-05	0.000317542	18.20221628	21.94420121	16.31331658	39.98819239	65.6040919	50.42845939	ACVRL1
ENSG00000214796	1.088369424	9.22E-05	0.000318416	47.11161862	38.90108397	33.64621544	98.15283587	70.20788783	84.93214214	AC098934.1
ENSG00000246695	1.411567487	9.48E-05	0.000326534	21.4143721	16.95688276	19.37206343	56.34699837	42.58511229	53.96729865	RASSF8-AS1
ENSG00000074276	1.424486399	9.62E-05	0.000331154	17.13149768	25.93405598	15.29373429	59.07346603	47.18890821	50.42845939	CDHR2
ENSG00000260231	1.500289797	9.65E-05	0.000331881	17.13149768	18.95181014	13.25456972	47.25877283	52.94365312	39.81194163	JHDM1D-AS1
ENSG00000225783	3.706384028	9.66E-05	0.000332028	19.27293489	16.95688276	26.50913944	49.98524049	476.492878	292.8389484	MIAT
ENSG00000079101	2.123088328	0.000103534	0.000354758	8.56574884	3.989854766	7.137076002	20.90291875	35.6794184	29.19542386	CLUL1
ENSG00000129757	-1.170450342	0.000104101	0.000356432	76.02102095	71.81738579	69.33159545	22.72056386	37.98131637	36.27310237	CDKN1C
ENSG00000171533	2.893130407	0.000104532	0.000357638	9.636467445	11.9695643	5.09791143	22.72056386	95.5287654	80.50859307	MAP6
ENSG00000261737	1.698734448	0.000106148	0.000362688	13.91934186	9.974636916	12.23498743	49.98524049	32.22657146	34.50368274	AL049597.2
ENSG00000171962	1.038019592	0.000109314	0.000372242	46.04090001	49.87318458	42.82245601	96.33519076	117.396796	72.54620474	DRC3
ENSG00000221818	3.942598049	0.000110022	0.000374373	2.14143721	0.997463692	1.019582286	0.908822554	39.13226535	23.88716498	EBF2
ENSG00000274317	2.446832829	0.000111187	0.000378054	3.212155815	4.987318458	4.078329144	29.08232174	18.41518369	19.46361591	LINC02334
ENSG00000185291	1.693372386	0.00011295	0.000383758	14.99006047	10.97210061	9.176240574	36.35290217	43.73606127	33.61897293	IL3RA
ENSG00000171873	1.976140812	0.000113385	0.000385094	18.20221628	4.987318458	5.09791143	44.53230516	35.6794184	30.08013367	ADRA1D
ENSG00000188015	-1.427904688	0.000115809	0.000392884	55.67736746	38.90108397	66.27284859	16.35880598	18.41518369	24.77187479	S100A3
ENSG00000180422	1.663775762	0.000117953	0.000399859	16.06077907	10.97210061	13.25456972	50.89406304	49.49080617	27.42600423	LINC00304
ENSG00000176401	1.150340605	0.000120741	0.000409003	35.33371396	28.92644706	35.68538001	58.16464348	86.32117356	77.85446362	EID2B
ENSG00000253266	1.986543655	0.000121702	0.00041195	4.28287442	18.95181014	5.09791143	32.71761196	47.18890821	33.61897293	AC100860.1
ENSG00000111981	-1.075758069	0.000121784	0.000412151	66.38455351	94.7590507	82.58616517	39.07936984	42.58511229	34.50368274	ULBP1
ENSG00000236242	1.903318612	0.000122157	0.000413184	12.84862326	3.989854766	10.19582286	33.62643451	37.98131637	29.19542386	MYO16-AS1
ENSG00000198580	3.046180501	0.000123031	0.000415752	6.42431163	0	1.019582286	12.72351576	21.86803063	25.6565846	AC073343.1
ENSG00000267523	1.290421915	0.000123153	0.000416086	37.47515117	17.95434645	30.58746858	67.25286902	88.62307152	54.85200846	AC008735.2
ENSG00000236502	2.648291374	0.000125453	0.000423462	2.14143721	3.989854766	3.058746858	18.17645109	18.41518369	21.23303553	SIX3-AS1
ENSG00000260691	2.462316358	0.000127108	0.000428648	2.14143721	6.982245841	3.058746858	18.17645109	27.62277554	22.11774535	ANKRD20A1
ENSG00000273576	1.183247876	0.000127461	0.000429679	34.26299536	34.91122921	31.60705087	55.43817582	101.2835103	73.43091455	AC009283.1
ENSG00000161180	-2.52705352	0.000127438	0.000429679	20.34365349	14.96195537	35.68538001	6.36175788	1.150948981	4.42354907	CCDC116
ENSG00000232498	1.449597108	0.000134448	0.000451221	20.34365349	13.96449168	19.37206343	42.71466005	61.00029598	43.35078088	NA
ENSG00000109819	1.72467291	0.000134658	0.000451675	10.70718605	12.96702799	9.176240574	38.17054728	42.58511229	28.31071405	PPARGC1A
ENSG00000254122	1.395986185	0.000135798	0.000454909	25.69724652	14.96195537	20.39164572	41.8058375	57.54744904	61.04497716	PCDHGB7
ENSG00000108947	1.471061213	0.000136003	0.000455512	20.34365349	20.94673752	19.37206343	31.8087894	72.50978579	64.58381642	EFNB3
ENSG00000189157	1.931481965	0.000138579	0.000463283	11.77790465	3.989854766	14.274152	34.53525707	24.1699286	54.85200846	FAM47E
ENSG00000158458	1.95466988	0.000140528	0.000469195	9.636467445	6.982245841	6.117493716	29.99114429	33.37752044	24.77187479	NRG2
ENSG00000250091	1.73921298	0.000142023	0.000473837	8.56574884	16.95688276	11.21540515	25.44703152	43.73606127	53.96729865	DNAH10OS
ENSG00000183454	1.335089822	0.000142998	0.000477004	24.62652791	16.95688276	21.41122801	52.71170815	57.54744904	48.65903977	GRIN2A
ENSG00000230224	1.959171842	0.000144329	0.000480998	7.495030235	7.979709533	7.137076002	32.71761196	33.37752044	22.11774535	PHBP9
ENSG00000231453	1.144673225	0.000145153	0.00048348	36.40443257	25.93405598	41.80287373	79.97638478	89.7740205	61.04497716	LINC01305
ENSG00000148288	-1.162405858	0.000145681	0.000485149	98.50611166	79.79709533	56.07702573	29.99114429	42.58511229	32.73426311	GBGT1
ENSG00000152154	3.001977259	0.000146063	0.000486243	1.070718605	4.987318458	1.019582286	17.26762853	29.9246735	10.61651777	TMEM178A
ENSG00000276644	2.311403281	0.000146562	0.000487633	5.353593025	9.974636916	7.137076002	9.088225544	61.00029598	42.46607107	DACH1
ENSG00000175773	2.068080072	0.000146594	0.00048765	5.353593025	8.977173224	6.117493716	19.9940962	39.13226535	27.42600423	AP002986.1
ENSG00000197653	1.781457825	0.000149227	0.000495955	10.70718605	8.977173224	20.39164572	22.72056386	55.24555108	60.16026735	DNAH10
ENSG00000255202	-2.565386872	0.000149979	0.000498089	22.4850907	20.94673752	19.37206343	0.908822554	3.452846942	6.192968697	AL049629.1
ENSG00000213420	1.890344187	0.00015111	0.000501477	44.97018141	43.88840243	33.64621544	74.52344946	229.0388472	151.2853782	GPC2
ENSG00000277224	1.853590049	0.000152579	0.000505983	4.28287442	12.96702799	10.19582286	36.35290217	33.37752044	30.08013367	HIST1H2BF
ENSG00000124140	1.132278885	0.000153824	0.000509551	40.68730699	44.88586612	23.45039258	88.15578777	67.90598987	82.27801269	SLC12A5
ENSG00000133069	1.23784907	0.000154719	0.000512332	28.90940233	23.9391286	28.54830401	48.16759538	66.75504089	76.96975381	TMCC2
ENSG00000182327	1.180641603	0.000155029	0.000513264	28.90940233	25.93405598	30.58746858	55.43817582	65.6040919	72.54620474	GLTPD2
ENSG00000184156	-1.013179655	0.000155684	0.000514867	135.9812628	106.728615	92.78198803	42.71466005	78.26453069	46.88962014	KCNQ3
ENSG00000245498	1.143502515	0.00015994	0.000527787	35.33371396	33.91376551	31.60705087	79.06756223	89.7740205	54.85200846	AP000866.1
ENSG00000091428	1.395276557	0.000166896	0.000549707	41.75802559	27.92898336	25.48955715	39.98819239	125.4534389	85.81685195	RAPGEF4
ENSG00000260903	7.2048508	0.000167626	0.000551445	0	0.997463692	0	5.452935326	93.22686744	64.58381642	XKR7
ENSG00000250420	2.915971805	0.000171062	0.000562034	3.212155815	0	4.078329144	12.72351576	20.71708165	21.23303553	AACSP1
ENSG00000260597	1.679542688	0.000171046	0.000562034	6.42431163	14.96195537	13.25456972	38.17054728	37.98131637	35.38839256	AC012531.1
ENSG00000244425	1.617127953	0.000172796	0.000567321	11.77790465	11.9695643	12.23498743	39.07936984	36.83036738	34.50368274	RN7SL268P
ENSG00000271880	2.194325914	0.000173754	0.000570156	4.28287442	3.989854766	8.156658288	28.17349918	18.41518369	28.31071405	AGAP11
ENSG00000188596	1.286821659	0.000176356	0.000578068	34.26299536	21.94420121	19.37206343	73.6146269	49.49080617	60.16026735	CFAP54
ENSG00000196876	1.316268278	0.000183054	0.00059883	22.4850907	25.93405598	25.48955715	42.71466005	85.17022458	57.5061379	SCN8A
ENSG00000088756	2.857649602	0.000183497	0.000600172	6.42431163	1.994927383	2.039164572	5.452935326	39.13226535	30.96484349	ARHGAP28
ENSG00000139970	3.520650208	0.000185112	0.000605119	26.76796512	38.90108397	42.82245601	69.97933669	630.7200415	544.9812454	RTN1
ENSG00000213077	1.223171241	0.000190941	0.000622969	20.34365349	27.92898336	26.50913944	57.25582092	62.15124496	55.73671828	NA
ENSG00000139055	-1.049352415	0.00019138	0.000624043	92.08180003	76.80470425	80.54700059	42.71466005	49.49080617	29.19542386	ERP27
ENSG00000234459	2.514335856	0.000192831	0.000628433	4.28287442	0.997463692	6.117493716	28.17349918	20.71708165	15.92477665	AC002064.2
ENSG00000018236	4.712174654	0.000203686	0.000660959	8.56574884	3.989854766	8.156658288	15.44998342	293.4919901	233.5633909	CNTN1
ENSG00000232504	1.717665307	0.000211532	0.000685561	17.13149768	11.9695643	5.09791143	41.8058375	35.6794184	34.50368274	ST3GAL5-AS1
ENSG00000277511	1.88802973	0.000214284	0.000693734	7.495030235	4.987318458	12.23498743	25.44703152	33.37752044	32.73426311	AC116407.2
ENSG00000129682	5.391036779	0.000215324	0.000696606	7.495030235	5.984782149	3.058746858	11.81469321	380.9641126	300.8013367	FGF13
ENSG00000229512	1.334891244	0.000216547	0.000700312	23.55580931	21.94420121	22.43081029	63.6175788	71.35883681	37.15781218	AC068580.1
ENSG00000257252	1.887557273	0.000222086	0.00071631	4.28287442	11.9695643	8.156658288	27.26467663	29.9246735	33.61897293	AC124947.1
ENSG00000153253	6.539490485	0.000225848	0.000727667	0	1.994927383	1.019582286	6.36175788	157.6800104	119.4358249	SCN3A
ENSG00000267009	1.83255748	0.000226613	0.000729741	9.636467445	6.982245841	10.19582286	21.8117413	35.6794184	38.042522	AC007780.1
ENSG00000276048	1.389195585	0.000231446	0.000743456	18.20221628	18.95181014	25.48955715	63.6175788	66.75504089	34.50368274	RF02250
ENSG00000220323	1.265886635	0.000232983	0.000747521	36.40443257	17.95434645	28.54830401	79.97638478	71.35883681	47.77432995	HIST2H2BD
ENSG00000228549	1.437364765	0.000234025	0.000750676	16.06077907	16.95688276	17.33289886	33.62643451	51.79270413	51.31316921	BX284668.2
ENSG00000149557	1.530274341	0.000234564	0.000752272	21.4143721	18.95181014	18.35248115	28.17349918	88.62307152	53.96729865	FEZ1
ENSG00000245317	1.508928591	0.000235599	0.000755459	18.20221628	12.96702799	12.23498743	38.17054728	48.33985719	37.15781218	AC008393.1
ENSG00000134986	2.863747345	0.000235817	0.000756025	40.68730699	47.8782572	32.62663315	72.70580435	437.3606127	372.4628317	NREP
ENSG00000070019	1.018434425	0.000237856	0.000762022	44.97018141	43.88840243	35.68538001	66.34404647	94.37781642	92.00982065	GUCY2C
ENSG00000167771	2.662778594	0.000238825	0.000764452	2.14143721	2.992391075	5.09791143	9.997048098	37.98131637	17.69419628	RCOR2
ENSG00000215009	1.826382	0.000241484	0.00077228	11.77790465	4.987318458	10.19582286	28.17349918	39.13226535	28.31071405	ACSM4
ENSG00000134874	1.394274769	0.000241478	0.00077228	16.06077907	18.95181014	16.31331658	39.98819239	48.33985719	46.88962014	DZIP1
ENSG00000149294	5.691045475	0.00024295	0.000776284	4.28287442	5.984782149	2.039164572	9.088225544	359.096082	268.0670736	NCAM1
ENSG00000106772	2.673016692	0.000253206	0.000806639	3.212155815	4.987318458	4.078329144	5.452935326	47.18890821	26.54129442	PRUNE2
ENSG00000259705	1.758497886	0.00025428	0.000809634	9.636467445	12.96702799	6.117493716	28.17349918	35.6794184	33.61897293	AC084757.3
ENSG00000185652	1.534180687	0.000254662	0.000810706	27.83868373	20.94673752	10.19582286	38.17054728	87.47212254	46.00491032	NTF3
ENSG00000172789	2.338696342	0.000262673	0.000834745	6.42431163	5.984782149	1.019582286	21.8117413	27.62277554	18.57890609	HOXC5
ENSG00000125207	1.632998976	0.00026601	0.000844166	19.27293489	7.979709533	13.25456972	32.71761196	58.69839802	34.50368274	PIWIL1
ENSG00000276791	1.175050543	0.000268354	0.000851008	38.54586978	24.93659229	24.46997486	59.07346603	80.56642865	59.27555753	AC092117.1
ENSG00000105737	1.819410958	0.000270185	0.000856515	16.06077907	8.977173224	12.23498743	17.26762853	67.90598987	46.88962014	GRIK5
ENSG00000150667	1.000929023	0.00027042	0.00085711	40.68730699	33.91376551	49.95953201	92.69990054	73.66073477	82.27801269	FSIP1
ENSG00000280119	2.23334024	0.0002716	0.000860548	6.42431163	5.984782149	2.039164572	20.90291875	23.01897962	23.88716498	AC093642.2
ENSG00000135477	-2.257307822	0.000272052	0.00086183	12.84862326	30.92137444	31.60705087	5.452935326	8.056642865	2.654129442	KRT87P
ENSG00000237813	-1.18630225	0.000289293	0.000912623	67.45527211	74.80977687	70.35117773	25.44703152	48.33985719	21.23303553	AC002066.1
ENSG00000132639	3.318617932	0.000290873	0.000917128	4.28287442	5.984782149	5.09791143	10.90587065	78.26453069	64.58381642	SNAP25
ENSG00000155980	6.389207371	0.000299063	0.000940497	0	2.992391075	3.058746858	11.81469321	287.7372452	210.5609357	KIF5A
ENSG00000196972	2.582843477	0.000301347	0.000947387	0	6.982245841	4.078329144	11.81469321	29.9246735	25.6565846	SMIM10L2B
ENSG00000214309	1.280473519	0.000301358	0.000947387	32.12155815	24.93659229	20.39164572	54.52935326	88.62307152	46.00491032	MBLAC1
ENSG00000104722	8.393478641	0.000307429	0.000965469	12.84862326	7.979709533	4.078329144	6.36175788	4745.362648	3619.347849	NEFM
ENSG00000259605	2.041312064	0.000311164	0.000975844	5.353593025	7.979709533	11.21540515	44.53230516	44.88701025	12.38593739	AC074212.1
ENSG00000250132	1.110392448	0.000312705	0.000979936	32.12155815	39.89854766	54.03786116	82.70285245	127.7553369	63.6991066	AC004803.1
ENSG00000164946	1.730761533	0.000318832	0.000997307	10.70718605	11.9695643	6.117493716	31.8087894	35.6794184	28.31071405	FREM1
ENSG00000185274	3.688495705	0.000321031	0.001003665	2.14143721	1.994927383	1.019582286	0	35.6794184	30.96484349	GALNT17
ENSG00000104833	2.881879805	0.000323181	0.001009515	16.06077907	9.974636916	22.43081029	32.71761196	168.0385512	156.5936371	TUBB4A
ENSG00000260526	1.321070807	0.000328571	0.001024764	26.76796512	19.94927383	16.31331658	39.07936984	61.00029598	57.5061379	AC109347.1
ENSG00000169885	1.5356	0.000334512	0.00104204	17.13149768	18.95181014	8.156658288	48.16759538	49.49080617	30.96484349	CALML6
ENSG00000260618	2.156097185	0.00033923	0.001055828	4.28287442	7.979709533	3.058746858	23.62938641	21.86803063	23.00245516	AC025917.1
ENSG00000247934	1.259161151	0.000348296	0.001082732	13.91934186	34.91122921	27.52872172	70.88815924	52.94365312	59.27555753	AC022364.1
ENSG00000173702	1.052041498	0.000353523	0.001096549	25.69724652	52.86557565	36.7049623	80.88520734	78.26453069	80.50859307	MUC13
ENSG00000273802	1.243527687	0.000355069	0.001100404	23.55580931	18.95181014	29.56788629	65.43522391	62.15124496	43.35078088	HIST1H2BG
ENSG00000104435	6.879173457	0.000359295	0.001112549	6.42431163	11.9695643	5.09791143	8.179402989	1542.271634	1216.475994	STMN2
ENSG00000110848	-2.007766278	0.00036454	0.001127252	18.20221628	26.93151967	28.54830401	5.452935326	5.754744904	7.077678511	CD69
ENSG00000127152	1.064163319	0.000368156	0.001137224	29.98012094	37.90362028	28.54830401	67.25286902	70.20788783	64.58381642	BCL11B
ENSG00000229835	-1.87645123	0.000368711	0.001138598	37.47515117	45.88332981	15.29373429	10.90587065	6.905693885	8.847098139	KHSRPP1
ENSG00000231652	1.543989826	0.000379075	0.001167816	10.70718605	11.9695643	16.31331658	29.99114429	47.18890821	37.15781218	AL590428.1
ENSG00000061337	2.93787012	0.000382442	0.001177788	5.353593025	6.982245841	8.156658288	13.63233832	82.86832662	61.04497716	LZTS1
ENSG00000084628	1.458555334	0.000382514	0.001177809	25.69724652	29.92391075	16.31331658	29.08232174	98.98161235	70.77678511	NKAIN1
ENSG00000150625	1.063413871	0.000384766	0.00118394	26.76796512	40.89601135	32.62663315	73.6146269	74.81168375	61.92968697	GPM6A
ENSG00000280254	1.113452141	0.000385934	0.001186729	28.90940233	28.92644706	37.72454458	63.6175788	88.62307152	55.73671828	AC233723.2
ENSG00000272129	-1.556024341	0.000385933	0.001186729	43.8994628	38.90108397	38.74412687	17.26762853	18.41518369	6.192968697	AL359715.3
ENSG00000260329	1.998169761	0.000386676	0.001188808	7.495030235	1.994927383	13.25456972	21.8117413	39.13226535	30.08013367	AC007541.1
ENSG00000237686	-1.788925017	0.000399901	0.001226971	28.90940233	22.94166491	34.66579772	9.997048098	6.905693885	7.962388325	AL109615.3
ENSG00000159753	-1.16531426	0.000403556	0.001236929	53.53593025	67.82753103	55.05744344	31.8087894	20.71708165	25.6565846	CARMIL2
ENSG00000234964	-2.002323479	0.000403878	0.001237709	23.55580931	30.92137444	20.39164572	5.452935326	9.207591846	4.42354907	FABP5P7
ENSG00000158164	1.748734747	0.000405049	0.001240669	9.636467445	20.94673752	12.23498743	19.08527364	79.41547967	46.88962014	TMSB15A
ENSG00000197748	1.771532233	0.000407406	0.001247043	17.13149768	4.987318458	8.156658288	42.71466005	33.37752044	26.54129442	CFAP43
ENSG00000245975	1.745107325	0.000410969	0.001257528	16.06077907	6.982245841	6.117493716	35.44407962	28.77372452	32.73426311	AC090515.2
ENSG00000187624	1.249518452	0.000417596	0.001275865	38.54586978	15.95941907	24.46997486	49.98524049	74.81168375	62.81439679	C17orf97
ENSG00000261335	1.856509442	0.00042277	0.001290152	8.56574884	4.987318458	12.23498743	31.8087894	42.58511229	19.46361591	AC005837.1
ENSG00000279631	1.109338199	0.000424688	0.001295353	25.69724652	28.92644706	31.60705087	64.52640136	69.05693885	53.08258883	AL158211.5
ENSG00000246859	2.259557249	0.000433006	0.00131917	3.212155815	10.97210061	4.078329144	10.90587065	49.49080617	28.31071405	STARD4-AS1
ENSG00000149043	1.097991649	0.000434349	0.001322307	33.19227675	29.92391075	25.48955715	71.79698179	61.00029598	56.62142809	SYT8
ENSG00000075043	2.560573882	0.000440534	0.001340303	20.34365349	11.9695643	24.46997486	35.44407962	163.4347553	136.2453113	KCNQ2
ENSG00000235350	2.293038455	0.000452301	0.001374718	1.070718605	2.992391075	10.19582286	29.08232174	20.71708165	20.34832572	AL606490.8
ENSG00000279833	1.667981084	0.000463509	0.001406192	17.13149768	11.9695643	5.09791143	30.89996685	46.03795923	31.8495533	AL031846.2
ENSG00000279561	1.137221061	0.000464786	0.001409358	29.98012094	43.88840243	22.43081029	71.79698179	86.32117356	54.85200846	AL845472.2
ENSG00000236871	1.244815224	0.000467267	0.001415934	22.4850907	20.94673752	18.35248115	50.89406304	49.49080617	46.00491032	LINC00106
ENSG00000269054	1.369171363	0.000468891	0.001420143	12.84862326	17.95434645	18.35248115	45.44112772	39.13226535	42.46607107	AC012313.6
ENSG00000138083	1.048048594	0.000483071	0.001460651	25.69724652	54.86050304	39.76370915	69.07051413	84.0192756	96.43336972	SIX3
ENSG00000263004	1.517360617	0.000485245	0.001466737	6.42431163	26.93151967	19.37206343	48.16759538	35.6794184	67.23794586	AC007114.1
ENSG00000136842	1.199253949	0.000487645	0.001473253	20.34365349	22.94166491	30.58746858	62.70875625	63.30219394	44.2354907	TMOD1
ENSG00000196557	1.8451175	0.000490267	0.001480434	11.77790465	7.979709533	18.35248115	13.63233832	69.05693885	54.85200846	CACNA1H
ENSG00000168280	5.203647671	0.000495079	0.001493224	19.27293489	11.9695643	9.176240574	17.26762853	839.041807	632.5675169	KIF5C
ENSG00000175414	1.686105012	0.000502221	0.00151225	17.13149768	12.96702799	13.25456972	18.17645109	77.11358171	45.12020051	ARL10
ENSG00000256083	-2.16955679	0.000505493	0.001520588	21.4143721	29.92391075	14.274152	3.635290217	5.754744904	5.308258883	AC090673.2
ENSG00000124253	2.563613609	0.000509079	0.0015296	3.212155815	4.987318458	1.019582286	18.17645109	25.32087758	11.50122758	PCK1
ENSG00000256915	-1.563089313	0.000512839	0.001539875	43.8994628	35.9086929	33.64621544	6.36175788	18.41518369	14.15535702	AC090023.2
ENSG00000272953	2.097680028	0.00051337	0.001541216	5.353593025	6.982245841	3.058746858	19.9940962	23.01897962	23.00245516	AC092171.4
ENSG00000171174	1.164917738	0.00051937	0.00155768	23.55580931	25.93405598	23.45039258	57.25582092	59.849347	46.88962014	RBKS
ENSG00000249626	1.10124892	0.000521639	0.001563193	22.4850907	39.89854766	27.52872172	62.70875625	69.05693885	61.92968697	AC024560.2
ENSG00000021826	2.160899543	0.000522872	0.001566289	5.353593025	6.982245841	3.058746858	18.17645109	34.52846942	16.80948646	CPS1
ENSG00000231203	-1.264827072	0.000525372	0.00157308	69.59670932	44.88586612	51.99869659	32.71761196	18.41518369	17.69419628	KRT8P10
ENSG00000250133	1.248615597	0.000544103	0.001625356	22.4850907	24.93659229	15.29373429	46.34995027	55.24555108	47.77432995	HOXC-AS2
ENSG00000213204	1.405345138	0.000547339	0.00163373	20.34365349	11.9695643	14.274152	37.26172473	47.18890821	38.92723181	AL049697.1
ENSG00000267571	2.898503428	0.000557183	0.001660924	0	3.989854766	3.058746858	29.99114429	6.905693885	15.92477665	AC104532.2
ENSG00000132718	5.395681598	0.000563935	0.001679118	3.212155815	8.977173224	5.09791143	8.179402989	412.0397351	308.7637251	SYT11
ENSG00000182132	1.594747173	0.000581388	0.001725138	20.34365349	14.96195537	6.117493716	57.25582092	39.13226535	28.31071405	KCNIP1
ENSG00000272468	1.571243682	0.000585533	0.001736867	11.77790465	9.974636916	11.21540515	35.44407962	27.62277554	34.50368274	AL021807.1
ENSG00000235681	1.983714748	0.000590821	0.001750836	8.56574884	8.977173224	2.039164572	19.9940962	31.07562248	26.54129442	AC245884.3
ENSG00000274520	1.281962504	0.000592283	0.001754879	11.77790465	21.94420121	35.68538001	59.07346603	50.64175515	59.27555753	RF02246
ENSG00000155961	2.287974572	0.000595215	0.00176299	5.353593025	4.987318458	4.078329144	8.179402989	33.37752044	29.19542386	RAB39B
ENSG00000154096	1.804041185	0.000600688	0.00177775	17.13149768	9.974636916	12.23498743	12.72351576	70.20788783	54.85200846	THY1
ENSG00000100095	4.944776619	0.000607494	0.001796428	1.070718605	1.994927383	0	4.544112772	54.0946021	36.27310237	SEZ6L
ENSG00000281026	1.357483887	0.000608671	0.001799614	23.55580931	24.93659229	11.21540515	59.07346603	59.849347	34.50368274	N4BP2L2-IT2
ENSG00000223658	1.156851568	0.00061017	0.001803751	23.55580931	24.93659229	24.46997486	58.16464348	59.849347	45.12020051	C1GALT1C1L
ENSG00000176909	1.370192748	0.00062342	0.00184052	17.13149768	11.9695643	18.35248115	44.53230516	37.98131637	39.81194163	MAMSTR
ENSG00000228492	1.238433181	0.000629291	0.001856643	23.55580931	20.94673752	18.35248115	44.53230516	61.00029598	43.35078088	RAB11FIP1P1
ENSG00000188993	1.315849665	0.000637159	0.00187833	22.4850907	12.96702799	23.45039258	42.71466005	40.28321433	62.81439679	LRRC66
ENSG00000270344	1.028433338	0.000640617	0.001886682	46.04090001	26.93151967	32.62663315	76.34109457	75.96263273	62.81439679	POC1B-AS1
ENSG00000269815	1.786945945	0.000644203	0.001896321	7.495030235	6.982245841	8.156658288	27.26467663	24.1699286	26.54129442	AC010463.3
ENSG00000139187	1.202276369	0.000654961	0.001925175	21.4143721	19.94927383	23.45039258	50.89406304	55.24555108	43.35078088	KLRG1
ENSG00000275542	2.221181992	0.000666526	0.001955365	4.28287442	2.992391075	5.09791143	19.08527364	21.86803063	16.80948646	AC027601.3
ENSG00000158560	1.077002858	0.000669321	0.001962296	47.11161862	32.91630182	24.46997486	55.43817582	81.71737764	83.16272251	DYNC1I1
ENSG00000174469	2.523635918	0.000673011	0.0019712	13.91934186	7.979709533	16.31331658	22.72056386	94.37781642	102.6263384	CNTNAP2
ENSG00000261349	1.71136658	0.00067715	0.001982045	22.4850907	2.992391075	11.21540515	34.53525707	50.64175515	34.50368274	AL031432.2
ENSG00000172020	6.802300862	0.000686877	0.002009542	1.070718605	2.992391075	4.078329144	2.726467663	493.7571128	414.0441929	GAP43
ENSG00000182013	2.802628844	0.000707888	0.002067344	3.212155815	2.992391075	4.078329144	1.817645109	40.28321433	30.08013367	PNMA8A
ENSG00000165863	2.189552283	0.000709537	0.002071157	3.212155815	6.982245841	3.058746858	16.35880598	19.56613267	24.77187479	C10orf82
ENSG00000169432	4.061684494	0.000711534	0.002076318	6.42431163	8.977173224	3.058746858	10.90587065	150.7743165	146.8618291	SCN9A
ENSG00000221740	-1.502633977	0.000723192	0.002108303	49.25305583	52.86557565	21.41122801	12.72351576	14.96233675	15.92477665	SNORD93
ENSG00000165923	1.002944756	0.000726204	0.002115836	37.47515117	36.90615659	45.88120287	86.33814266	100.1325613	55.73671828	AGBL2
ENSG00000223749	1.184077465	0.000742904	0.002160557	21.4143721	19.94927383	27.52872172	59.07346603	55.24555108	42.46607107	MIR503HG
ENSG00000241889	1.092464312	0.00074754	0.002172706	32.12155815	26.93151967	22.43081029	53.62053071	59.849347	60.16026735	AC079944.2
ENSG00000124749	1.57957169	0.00075095	0.002181859	16.06077907	6.982245841	13.25456972	40.89701495	43.73606127	23.88716498	COL21A1
ENSG00000276707	-1.01642051	0.000760448	0.002206978	88.86964421	63.83767626	68.31201316	32.71761196	48.33985719	29.19542386	AC243773.1
ENSG00000204956	1.678632164	0.000764791	0.002217454	8.56574884	9.974636916	8.156658288	32.71761196	29.9246735	23.00245516	PCDHGA1
ENSG00000079102	2.218688949	0.000765288	0.002218186	2.14143721	3.989854766	11.21540515	11.81469321	46.03795923	23.88716498	RUNX1T1
ENSG00000174498	1.626456518	0.000782517	0.00226378	13.91934186	16.95688276	15.29373429	16.35880598	75.96263273	51.31316921	IGDCC3
ENSG00000129990	2.474167345	0.000795932	0.002298557	8.56574884	1.994927383	2.039164572	7.270580435	36.83036738	25.6565846	SYT5
ENSG00000233806	2.042866212	0.000796809	0.002299989	2.14143721	5.984782149	10.19582286	17.26762853	37.98131637	21.23303553	LINC01237
ENSG00000231305	1.182101621	0.000816732	0.002352257	23.55580931	18.95181014	34.66579772	68.16169158	41.43416331	64.58381642	AC112484.1
ENSG00000077279	7.639701238	0.000818675	0.002357103	2.14143721	1.994927383	6.117493716	1.817645109	1171.666062	872.3238765	DCX
ENSG00000110375	-1.233822701	0.000822411	0.002367109	52.46521164	50.87064827	44.86162058	28.17349918	20.71708165	14.15535702	UPK2
ENSG00000168952	1.044122063	0.000826632	0.002377746	38.54586978	20.94673752	44.86162058	76.34109457	65.6040919	72.54620474	STXBP6
ENSG00000179915	4.728639131	0.000826816	0.0023779	3.212155815	2.992391075	4.078329144	4.544112772	157.6800104	110.5887267	NRXN1
ENSG00000215861	2.380864856	0.000833555	0.00239614	3.212155815	1.994927383	6.117493716	9.088225544	25.32087758	24.77187479	AC245297.1
ENSG00000253953	6.639599281	0.00084164	0.00241823	0	0	1.019582286	2.726467663	59.849347	47.77432995	PCDHGB4
ENSG00000111834	2.345647034	0.000844167	0.002424723	3.212155815	2.992391075	4.078329144	13.63233832	23.01897962	15.92477665	RSPH4A
ENSG00000132530	1.358059144	0.000844429	0.002425091	11.77790465	19.94927383	16.31331658	40.89701495	49.49080617	33.61897293	XAF1
ENSG00000176887	5.313423889	0.000851759	0.002444209	2.14143721	3.989854766	3.058746858	3.635290217	220.9822043	141.5535702	SOX11
ENSG00000172425	1.580596554	0.000859038	0.002464316	17.13149768	14.96195537	12.23498743	67.25286902	17.26423471	46.88962014	TTC36
ENSG00000185008	5.969817534	0.000863367	0.002475559	2.14143721	1.994927383	0	4.544112772	139.2648267	115.0122758	ROBO2
ENSG00000244459	1.631583879	0.000872493	0.00249817	7.495030235	6.982245841	15.29373429	30.89996685	27.62277554	33.61897293	AC147067.1
ENSG00000065609	6.626589118	0.000874856	0.002503752	0	0.997463692	0	2.726467663	63.30219394	43.35078088	SNAP91
ENSG00000270605	1.331131042	0.000896009	0.002557428	26.76796512	15.95941907	12.23498743	37.26172473	43.73606127	56.62142809	AL353622.1
ENSG00000107742	1.026050583	0.000897267	0.00256021	47.11161862	45.88332981	35.68538001	51.8028856	113.9439491	97.31807953	SPOCK2
ENSG00000221866	4.567066257	0.000900385	0.002568704	27.83868373	26.93151967	22.43081029	24.53820897	989.8161235	815.7024484	PLXNA4
ENSG00000256092	1.37829451	0.000910541	0.002595636	17.13149768	16.95688276	11.21540515	33.62643451	48.33985719	36.27310237	AC137767.1
ENSG00000250608	1.784086497	0.000912839	0.002601368	7.495030235	7.979709533	6.117493716	22.72056386	24.1699286	27.42600423	AC010210.1
ENSG00000188738	2.090752453	0.00094585	0.002690228	3.212155815	5.984782149	8.156658288	10.90587065	39.13226535	24.77187479	FSIP2
ENSG00000183032	1.445116845	0.000949824	0.002699554	13.91934186	13.96449168	10.19582286	38.17054728	34.52846942	30.96484349	SLC25A21
ENSG00000179044	1.279585422	0.00097327	0.002758841	13.91934186	27.92898336	18.35248115	35.44407962	52.94365312	58.39084772	EXOC3L1
ENSG00000101134	2.199468495	0.000977562	0.002768843	4.28287442	11.9695643	3.058746858	8.179402989	50.64175515	30.96484349	DOK5
ENSG00000115896	2.313476709	0.000984569	0.002785208	3.212155815	4.987318458	7.137076002	5.452935326	41.43416331	30.08013367	PLCL1
ENSG00000245105	2.377630626	0.000986704	0.002789507	2.14143721	5.984782149	2.039164572	16.35880598	12.66043879	23.88716498	A2M-AS1
ENSG00000183833	1.082790709	0.001006386	0.002837188	32.12155815	26.93151967	23.45039258	68.16169158	58.69839802	47.77432995	MAATS1
ENSG00000274220	1.308393318	0.001013305	0.002855363	12.84862326	17.95434645	18.35248115	35.44407962	41.43416331	45.12020051	AC009163.7
ENSG00000142606	1.425889485	0.001027368	0.002891844	16.06077907	16.95688276	10.19582286	50.89406304	36.83036738	28.31071405	MMEL1
ENSG00000179168	1.43673961	0.001032103	0.002902921	17.13149768	7.979709533	17.33289886	45.44112772	39.13226535	30.08013367	GGN
ENSG00000225963	1.653574456	0.001051349	0.0029511	6.42431163	11.9695643	9.176240574	32.71761196	33.37752044	21.23303553	AC009950.1
ENSG00000136514	1.39189924	0.001061846	0.002977801	21.4143721	15.95941907	10.19582286	39.07936984	55.24555108	30.96484349	RTP4
ENSG00000171189	1.386580965	0.001068708	0.002995654	19.27293489	25.93405598	25.48955715	23.62938641	94.37781642	68.12265567	GRIK1
ENSG00000183128	-1.052201487	0.001072453	0.003004759	61.03096048	67.82753103	53.01827887	21.8117413	34.52846942	31.8495533	CALHM3
ENSG00000260097	1.136692861	0.001093357	0.003060017	32.12155815	25.93405598	17.33289886	52.71170815	65.6040919	47.77432995	SPDYE6
ENSG00000164330	3.401854732	0.00109862	0.003073797	11.77790465	8.977173224	10.19582286	13.63233832	173.7932961	139.7841506	EBF1
ENSG00000189052	-1.763762164	0.001098485	0.003073797	19.27293489	30.92137444	28.54830401	4.544112772	8.056642865	10.61651777	CGB5
ENSG00000244041	1.218963801	0.001131512	0.003158028	18.20221628	41.89347505	22.43081029	44.53230516	57.54744904	90.24040102	LINC01011
ENSG00000271590	1.940826404	0.00113437	0.003164544	9.636467445	3.989854766	6.117493716	18.17645109	40.28321433	17.69419628	AC108463.3
ENSG00000072832	3.95379448	0.001135854	0.003167709	25.69724652	18.95181014	15.29373429	22.72056386	528.2855822	377.7710905	CRMP1
ENSG00000067445	4.086152423	0.001145686	0.003192183	3.212155815	0.997463692	3.058746858	4.544112772	57.54744904	61.04497716	TRO
ENSG00000223551	-1.199433436	0.00114945	0.003201195	69.59670932	60.84528519	47.92036744	12.72351576	28.77372452	36.27310237	TMSB4XP4
ENSG00000246090	1.32277209	0.001158314	0.003223404	19.27293489	22.94166491	9.176240574	42.71466005	47.18890821	38.92723181	AP002026.1
ENSG00000277586	7.903353436	0.001197413	0.003320492	4.28287442	6.982245841	4.078329144	0.908822554	2072.859114	1601.324763	NEFL
ENSG00000235897	1.344349112	0.001207603	0.003345679	27.83868373	15.95941907	14.274152	39.98819239	73.66073477	34.50368274	TM4SF19-AS1
ENSG00000259162	2.417152156	0.001210392	0.003352382	2.14143721	4.987318458	2.039164572	19.9940962	10.35854083	18.57890609	AL355075.5
ENSG00000186188	1.074637866	0.001233613	0.00341461	25.69724652	41.89347505	22.43081029	64.52640136	74.81168375	51.31316921	FFAR4
ENSG00000175356	1.057976547	0.001235805	0.003420153	22.4850907	30.92137444	31.60705087	69.97933669	58.69839802	48.65903977	SCUBE2
ENSG00000130287	5.586506643	0.001237963	0.003425604	2.14143721	0.997463692	2.039164572	1.817645109	140.4157757	106.1651777	NCAN
ENSG00000233760	1.761634423	0.001251069	0.003457649	6.42431163	16.95688276	3.058746858	27.26467663	35.6794184	27.42600423	AC004947.1
ENSG00000228816	-1.248003986	0.001272591	0.003510709	57.81880467	53.86303935	51.99869659	22.72056386	36.83036738	10.61651777	AK3P5
ENSG00000138378	1.475855592	0.001295519	0.003569617	12.84862326	5.984782149	20.39164572	35.44407962	39.13226535	34.50368274	STAT4
ENSG00000281501	1.32218666	0.001295772	0.00356977	12.84862326	11.9695643	25.48955715	44.53230516	36.83036738	44.2354907	SEPSECS-AS1
ENSG00000171956	1.965189805	0.001296365	0.003570862	4.28287442	5.984782149	6.117493716	22.72056386	27.62277554	14.15535702	FOXB1
ENSG00000133958	1.187593558	0.001309997	0.003605126	47.11161862	27.92898336	13.25456972	52.71170815	73.66073477	74.31562437	UNC79
ENSG00000184588	2.072294652	0.001322022	0.003633685	8.56574884	7.979709533	3.058746858	9.088225544	48.33985719	25.6565846	PDE4B
ENSG00000254363	1.55003614	0.001328193	0.003646347	10.70718605	11.9695643	11.21540515	34.53525707	46.03795923	19.46361591	AC011379.2
ENSG00000166246	1.310187502	0.00133	0.003650203	8.56574884	21.94420121	21.41122801	39.98819239	41.43416331	47.77432995	C16orf71
ENSG00000182463	1.591644496	0.001331982	0.003655088	4.28287442	22.94166491	15.29373429	23.62938641	59.849347	46.00491032	TSHZ2
ENSG00000156042	1.121008004	0.00134244	0.00367989	18.20221628	37.90362028	31.60705087	72.70580435	75.96263273	43.35078088	CFAP70
ENSG00000184185	1.756165114	0.001346708	0.003691029	9.636467445	8.977173224	8.156658288	12.72351576	43.73606127	34.50368274	KCNJ12
ENSG00000170153	1.755089489	0.001347366	0.003692277	9.636467445	10.97210061	8.156658288	11.81469321	46.03795923	39.81194163	RNF150
ENSG00000101098	1.737567955	0.001347769	0.003692821	10.70718605	9.974636916	6.117493716	16.35880598	47.18890821	26.54129442	RIMS4
ENSG00000260896	2.143893459	0.00136051	0.003722668	6.42431163	0.997463692	7.137076002	15.44998342	32.22657146	16.80948646	LINC02170
ENSG00000115266	1.039628965	0.001402807	0.003832043	183.0928815	199.4927383	149.878596	235.3850416	483.3985719	376.8863807	APC2
ENSG00000278817	1.2485254	0.001407044	0.003842459	13.91934186	15.95941907	28.54830401	37.26172473	50.64175515	51.31316921	AC007325.4
ENSG00000162849	1.378713608	0.001419925	0.003877051	14.99006047	23.9391286	19.37206343	23.62938641	77.11358171	52.19787902	KIF26B
ENSG00000205177	-1.853424593	0.001428027	0.003897412	31.05083954	22.94166491	19.37206343	2.726467663	6.905693885	10.61651777	C11orf91
ENSG00000140538	4.050520047	0.001453261	0.003959131	3.212155815	1.994927383	1.019582286	3.635290217	50.64175515	48.65903977	NTRK3
ENSG00000278224	1.29622165	0.00146196	0.003981036	16.06077907	12.96702799	23.45039258	56.34699837	36.83036738	35.38839256	PRICKLE4
ENSG00000163462	1.035561163	0.001466124	0.003990857	26.76796512	24.93659229	31.60705087	49.07641794	65.6040919	56.62142809	TRIM46
ENSG00000172243	-1.355150718	0.001466227	0.003990857	38.54586978	31.91883813	33.64621544	12.72351576	13.81138777	14.15535702	CLEC7A
ENSG00000151023	1.783167106	0.001469616	0.003999482	5.353593025	5.984782149	10.19582286	29.99114429	27.62277554	16.80948646	ENKUR
ENSG00000230628	2.075492118	0.001470479	0.00400123	4.28287442	2.992391075	6.117493716	19.08527364	14.96233675	22.11774535	AL160408.3
ENSG00000277342	-1.516680098	0.001487045	0.004040245	34.26299536	25.93405598	29.56788629	8.179402989	13.81138777	9.731807953	AC048344.4
ENSG00000152128	1.865337079	0.001518993	0.004119637	4.28287442	6.982245841	9.176240574	12.72351576	32.22657146	30.08013367	TMEM163
ENSG00000204044	2.079459793	0.001519526	0.004120468	5.353593025	1.994927383	6.117493716	18.17645109	21.86803063	16.80948646	SLC12A5-AS1
ENSG00000166426	3.837516795	0.001520151	0.004121545	7.495030235	4.987318458	6.117493716	7.270580435	154.2271634	104.395758	CRABP1
ENSG00000187068	2.018746458	0.001534498	0.004157336	5.353593025	6.982245841	4.078329144	9.997048098	27.62277554	29.19542386	C3orf70
ENSG00000184923	1.159811859	0.001536909	0.004163248	17.13149768	18.95181014	25.48955715	47.25877283	47.18890821	43.35078088	NUTM2A
ENSG00000170091	5.947522905	0.001551231	0.004198906	2.14143721	0.997463692	0	2.726467663	112.7930001	76.96975381	NSG2
ENSG00000229330	2.122366065	0.00155647	0.004209944	2.14143721	4.987318458	5.09791143	16.35880598	19.56613267	17.69419628	AC006947.1
ENSG00000249855	1.174382005	0.001572565	0.004250943	18.20221628	25.93405598	24.46997486	59.98228859	62.15124496	33.61897293	EEF1A1P19
ENSG00000164659	1.507487929	0.001574783	0.004254402	26.76796512	16.95688276	7.137076002	22.72056386	69.05693885	53.08258883	KIAA1324L
ENSG00000145002	1.565648813	0.001583984	0.004275435	11.77790465	13.96449168	8.156658288	24.53820897	52.94365312	23.88716498	FAM86B2
ENSG00000275549	1.686556262	0.001589221	0.004287657	11.77790465	6.982245841	5.09791143	26.35585408	25.32087758	24.77187479	STPG3-AS1
ENSG00000104112	4.144907418	0.001647665	0.004430175	5.353593025	2.992391075	4.078329144	4.544112772	115.0948981	99.97220897	SCG3
ENSG00000007402	1.706297135	0.001652293	0.004441962	7.495030235	10.97210061	14.274152	11.81469321	50.64175515	45.12020051	CACNA2D2
ENSG00000154928	2.256231093	0.001652623	0.00444219	7.495030235	2.992391075	3.058746858	6.36175788	29.9246735	28.31071405	EPHB1
ENSG00000087258	4.030060217	0.00165505	0.004448054	3.212155815	4.987318458	6.117493716	5.452935326	128.9062858	99.97220897	GNAO1
ENSG00000281468	1.077432709	0.001664129	0.004470466	33.19227675	24.93659229	25.48955715	49.07641794	80.56642865	47.77432995	AC006504.8
ENSG00000170476	1.09583025	0.001686778	0.004529298	36.40443257	17.95434645	24.46997486	58.16464348	63.30219394	46.88962014	MZB1
ENSG00000279386	-2.193520229	0.001688506	0.00453211	21.4143721	18.95181014	12.23498743	6.36175788	2.301897962	2.654129442	AC021106.3
ENSG00000091972	2.966166469	0.001692879	0.004542316	9.636467445	5.984782149	3.058746858	10.90587065	74.81168375	60.16026735	CD200
ENSG00000089163	1.641682549	0.001695133	0.004547019	9.636467445	8.977173224	6.117493716	22.72056386	24.1699286	30.08013367	SIRT4
ENSG00000260495	2.021370165	0.001700438	0.004558551	5.353593025	4.987318458	5.09791143	10.90587065	20.71708165	30.96484349	AC009148.1
ENSG00000078018	2.193523533	0.001701	0.004559384	54.60664885	49.87318458	37.72454458	63.6175788	331.4733065	255.6811362	MAP2
ENSG00000158321	1.424834133	0.001715886	0.004597246	18.20221628	18.95181014	23.45039258	19.9940962	90.92496948	53.08258883	AUTS2
ENSG00000144583	1.876014467	0.001718189	0.004602057	2.14143721	11.9695643	10.19582286	12.72351576	44.88701025	32.73426311	4-Mar
ENSG00000162706	3.44838944	0.001737227	0.004648243	9.636467445	5.984782149	6.117493716	9.088225544	133.5100818	94.66395009	CADM3
ENSG00000249007	2.43744702	0.0017585	0.004701693	7.495030235	0	3.058746858	23.62938641	24.1699286	8.847098139	AL691482.3
ENSG00000265148	1.499948501	0.001766764	0.004719614	8.56574884	12.96702799	10.19582286	32.71761196	34.52846942	23.00245516	TSPOAP1-AS1
ENSG00000235142	1.219242399	0.001777148	0.004743159	22.4850907	15.95941907	18.35248115	34.53525707	57.54744904	40.69665144	LINC02532
ENSG00000205090	1.021939524	0.001799168	0.004798399	31.05083954	29.92391075	21.41122801	54.52935326	59.849347	53.08258883	TMEM240
ENSG00000162641	-1.284635514	0.001829813	0.00487511	55.67736746	46.8807935	46.90078516	17.26762853	35.6794184	9.731807953	AKNAD1
ENSG00000230612	2.028984971	0.001869872	0.00497526	6.42431163	2.992391075	5.09791143	11.81469321	25.32087758	22.11774535	AC004039.1
ENSG00000206579	5.278743931	0.001873645	0.004982373	1.070718605	0	2.039164572	2.726467663	69.05693885	48.65903977	XKR4
ENSG00000165731	1.525551677	0.001883021	0.00500437	47.11161862	39.89854766	31.60705087	56.34699837	168.0385512	117.6664053	RET
ENSG00000272654	1.244654944	0.001883946	0.005006094	11.77790465	16.95688276	23.45039258	38.17054728	47.18890821	38.92723181	AL358472.2
ENSG00000260899	-1.760769173	0.001909791	0.005069571	26.76796512	21.94420121	21.41122801	3.635290217	10.35854083	7.077678511	AC106886.2
ENSG00000130558	1.021167735	0.001912037	0.005074791	47.11161862	46.8807935	38.74412687	44.53230516	124.3024899	101.7416286	OLFM1
ENSG00000146938	6.618224389	0.001926473	0.005107873	0	0	1.019582286	1.817645109	64.45314292	42.46607107	NLGN4X
ENSG00000044524	2.481833666	0.001930957	0.005118264	4.28287442	3.989854766	2.039164572	3.635290217	32.22657146	22.11774535	EPHA3
ENSG00000132122	1.064903209	0.001934707	0.005126706	20.34365349	31.91883813	31.60705087	50.89406304	78.26453069	47.77432995	SPATA6
ENSG00000110076	5.263796293	0.001937756	0.005134033	2.14143721	0.997463692	3.058746858	1.817645109	133.5100818	102.6263384	NRXN2
ENSG00000162643	1.526620422	0.001952271	0.00516796	8.56574884	8.977173224	11.21540515	28.17349918	31.07562248	23.88716498	WDR63
ENSG00000237940	1.25337689	0.001960822	0.005187568	16.06077907	14.96195537	19.37206343	35.44407962	51.79270413	33.61897293	LINC01238
ENSG00000260757	1.030951507	0.001977586	0.005228867	24.62652791	26.93151967	26.50913944	57.25582092	57.54744904	45.12020051	AC093520.1
ENSG00000121769	1.056403477	0.002012746	0.005312535	19.27293489	29.92391075	25.48955715	51.8028856	56.39650006	47.77432995	FABP3
ENSG00000159217	6.890539205	0.002017553	0.005322899	1.070718605	0	0	1.817645109	81.71737764	47.77432995	IGF2BP1
ENSG00000181541	5.218663003	0.002041294	0.005380839	4.28287442	0	1.019582286	6.36175788	95.5287654	93.77924027	MAB21L2
ENSG00000255261	1.794354262	0.002084837	0.00548465	8.56574884	3.989854766	7.137076002	18.17645109	19.56613267	30.08013367	OR7E4P
ENSG00000268460	1.455445436	0.00208786	0.005491612	16.06077907	8.977173224	10.19582286	22.72056386	35.6794184	38.042522	AC006262.1
ENSG00000234699	1.549748681	0.002111121	0.005545553	8.56574884	7.979709533	11.21540515	21.8117413	27.62277554	31.8495533	AL139339.1
ENSG00000162873	6.250487538	0.002114491	0.005552798	1.070718605	0	0	1.817645109	50.64175515	31.8495533	KLHDC8A
ENSG00000164061	1.026480581	0.002115139	0.005553694	37.47515117	27.92898336	34.66579772	40.89701495	82.86832662	80.50859307	BSN
ENSG00000237732	1.014577602	0.002119153	0.005562623	25.69724652	27.92898336	29.56788629	58.16464348	43.73606127	65.46852623	AC010980.1
ENSG00000109472	2.047359021	0.002137309	0.005603791	86.728207	79.79709533	77.48825374	99.06165842	471.8890821	437.9313579	CPE
ENSG00000260727	-1.039840446	0.002175382	0.005697848	71.73814653	104.7336876	66.27284859	50.89406304	49.49080617	18.57890609	SLC7A5P1
ENSG00000187957	1.720074495	0.002187349	0.005725108	8.56574884	11.9695643	9.176240574	9.997048098	46.03795923	42.46607107	DNER
ENSG00000269959	1.061287571	0.002204254	0.00576265	28.90940233	20.94673752	31.60705087	52.71170815	74.81168375	43.35078088	SPACA6P-AS
ENSG00000163531	4.008165672	0.002223809	0.005807912	10.70718605	10.97210061	9.176240574	8.179402989	279.6806023	208.7915161	NFASC
ENSG00000213424	-1.870399981	0.002233099	0.005828816	34.26299536	19.94927383	15.29373429	4.544112772	3.452846942	10.61651777	KRT222
ENSG00000171724	6.98109955	0.002237012	0.00583651	2.14143721	0	2.039164572	1.817645109	300.397684	223.8315829	VAT1L
ENSG00000154277	5.878749141	0.002238941	0.005840702	6.42431163	1.994927383	2.039164572	1.817645109	359.096082	253.0270068	UCHL1
ENSG00000159409	4.21505511	0.002260037	0.005886419	3.212155815	1.994927383	1.019582286	2.726467663	58.69839802	53.96729865	CELF3
ENSG00000184144	7.429932939	0.002289402	0.005955205	2.14143721	6.982245841	0	6.36175788	900.042103	669.7253291	CNTN2
ENSG00000229474	1.588605605	0.002334513	0.006062979	8.56574884	6.982245841	11.21540515	20.90291875	23.01897962	36.27310237	PATL2
ENSG00000102109	1.708347944	0.002347118	0.006090482	6.42431163	16.95688276	7.137076002	14.54116087	56.39650006	30.08013367	PCSK1N
ENSG00000263426	1.428737247	0.002395333	0.006205824	19.27293489	6.982245841	17.33289886	52.71170815	21.86803063	41.58136125	RN7SL471P
ENSG00000261879	1.23536145	0.002417188	0.006257084	17.13149768	18.95181014	14.274152	42.71466005	47.18890821	29.19542386	AC087500.1
ENSG00000159784	1.782386801	0.002428325	0.006282326	29.98012094	31.91883813	27.52872172	38.17054728	149.6233675	120.3205347	FAM131B
ENSG00000143355	1.830895722	0.002431344	0.006289239	5.353593025	3.989854766	8.156658288	19.08527364	17.26423471	25.6565846	LHX9
ENSG00000184368	1.833821292	0.002447922	0.006327609	8.56574884	9.974636916	11.21540515	6.36175788	55.24555108	45.12020051	MAP7D2
ENSG00000234327	1.134364849	0.002447584	0.006327609	24.62652791	24.93659229	13.25456972	42.71466005	48.33985719	46.88962014	AC012146.1
ENSG00000271327	1.590855307	0.002527112	0.00651281	8.56574884	6.982245841	9.176240574	20.90291875	29.9246735	23.88716498	AC010201.2
ENSG00000239763	1.284694068	0.002558191	0.006586353	11.77790465	14.96195537	17.33289886	38.17054728	41.43416331	28.31071405	AC009120.1
ENSG00000137872	4.459413358	0.002560083	0.006590286	1.070718605	4.987318458	3.058746858	3.635290217	120.849643	76.96975381	SEMA6D
ENSG00000260176	1.035178075	0.002560551	0.006590555	26.76796512	29.92391075	19.37206343	53.62053071	57.54744904	45.12020051	AC141586.2
ENSG00000213344	-1.142353569	0.002572678	0.006618953	51.39449304	53.86303935	37.72454458	13.63233832	28.77372452	23.00245516	PCNPP3
ENSG00000254369	1.415075493	0.00258523	0.006650302	16.06077907	13.96449168	6.117493716	28.17349918	34.52846942	33.61897293	HOXA-AS3
ENSG00000185477	1.203084504	0.00259738	0.006676952	16.06077907	21.94420121	13.25456972	36.35290217	40.28321433	41.58136125	GPRIN3
ENSG00000250033	-1.791497215	0.002611319	0.006706946	18.20221628	18.95181014	25.48955715	6.36175788	3.452846942	7.962388325	SLC7A11-AS1
ENSG00000105894	2.895164406	0.00265376	0.006809202	14.99006047	17.95434645	25.48955715	21.8117413	222.1331533	191.0973198	PTN
ENSG00000267077	1.492205416	0.002692983	0.006903006	12.84862326	4.987318458	17.33289886	39.98819239	36.83036738	22.11774535	AC020663.2
ENSG00000034053	1.65560963	0.002696755	0.006910722	11.77790465	10.97210061	15.29373429	9.088225544	56.39650006	54.85200846	APBA2
ENSG00000248243	1.804144917	0.002700783	0.006919086	6.42431163	5.984782149	5.09791143	18.17645109	26.47182656	16.80948646	LINC02014
ENSG00000064300	4.382083244	0.002716369	0.006955085	17.13149768	5.984782149	10.19582286	8.179402989	391.3226535	294.608368	NGFR
ENSG00000206344	1.037318717	0.002727989	0.006980894	18.20221628	25.93405598	31.60705087	46.34995027	57.54744904	52.19787902	HCG27
ENSG00000244556	-1.903649842	0.002738491	0.007001842	21.4143721	15.95941907	17.33289886	4.544112772	5.754744904	4.42354907	ODCP
ENSG00000186310	5.815786761	0.002744126	0.00701526	1.070718605	0	2.039164572	1.817645109	101.2835103	71.66149493	NAP1L3
ENSG00000184619	1.340060093	0.002745509	0.007016952	22.4850907	9.974636916	10.19582286	31.8087894	41.43416331	34.50368274	KRBA2
ENSG00000277311	1.009850905	0.002752425	0.007033502	24.62652791	23.9391286	28.54830401	49.98524049	59.849347	46.00491032	RF02247
ENSG00000145335	1.991494221	0.002779079	0.007096612	5.353593025	5.984782149	6.117493716	6.36175788	28.77372452	34.50368274	SNCA
ENSG00000189129	1.596533456	0.002803544	0.007151583	7.495030235	10.97210061	11.21540515	18.17645109	50.64175515	22.11774535	PLAC9
ENSG00000198910	2.335216423	0.002834192	0.007221077	67.45527211	45.88332981	49.95953201	64.52640136	427.0020719	332.65089	L1CAM
ENSG00000163873	3.577632634	0.002838383	0.007230605	3.212155815	2.992391075	4.078329144	3.635290217	64.45314292	54.85200846	GRIK3
ENSG00000163219	1.423351758	0.002841407	0.00723641	10.70718605	14.96195537	8.156658288	37.26172473	28.77372452	24.77187479	ARHGAP25
ENSG00000229563	-1.958912574	0.002842728	0.007237741	26.76796512	26.93151967	18.35248115	2.726467663	14.96233675	1.769419628	LINC01204
ENSG00000261211	1.055702098	0.002884019	0.00732641	21.4143721	28.92644706	22.43081029	44.53230516	64.45314292	43.35078088	AL031123.2
ENSG00000184226	2.559923225	0.002889071	0.007337994	3.212155815	2.992391075	3.058746858	1.817645109	31.07562248	22.11774535	PCDH9
ENSG00000087085	1.351119818	0.002906368	0.007378016	17.13149768	24.93659229	13.25456972	19.9940962	69.05693885	53.08258883	ACHE
ENSG00000126950	6.813543055	0.002912274	0.007390939	0	0	0	1.817645109	39.13226535	23.00245516	TMEM35A
ENSG00000141431	7.17304343	0.003004145	0.007599633	0	0	0	1.817645109	48.33985719	31.8495533	ASXL3
ENSG00000137285	2.780584106	0.003058015	0.007721903	68.52599072	57.85289411	56.07702573	60.89111114	671.0032558	521.9787902	TUBB2B
ENSG00000245711	1.80135429	0.003078381	0.007762927	4.28287442	8.977173224	4.078329144	22.72056386	18.41518369	19.46361591	NADK2-AS1
ENSG00000186648	1.719514243	0.003078542	0.007762927	6.42431163	4.987318458	9.176240574	14.54116087	28.77372452	24.77187479	CARMIL3
ENSG00000273448	1.291548269	0.003093202	0.007796639	16.06077907	15.95941907	11.21540515	43.62348261	25.32087758	36.27310237	AC006480.2
ENSG00000082397	3.854699743	0.003130094	0.007885245	11.77790465	9.974636916	9.176240574	7.270580435	250.9068778	189.3279002	EPB41L3
ENSG00000141506	1.052871759	0.003189806	0.008027862	26.76796512	14.96195537	34.66579772	53.62053071	55.24555108	49.54374958	PIK3R5
ENSG00000246790	1.470233874	0.003191643	0.008030278	11.77790465	15.95941907	5.09791143	37.26172473	29.9246735	23.88716498	AP000977.1
ENSG00000165028	2.068507963	0.003239883	0.008142592	4.28287442	0.997463692	7.137076002	15.44998342	20.71708165	15.92477665	NIPSNAP3B
ENSG00000135447	3.350773924	0.003247203	0.008158726	8.56574884	2.992391075	4.078329144	7.270580435	98.98161235	53.08258883	PPP1R1A
ENSG00000280684	1.918789482	0.00328594	0.00825034	4.28287442	5.984782149	4.078329144	17.26762853	24.1699286	13.27064721	NA
ENSG00000278035	1.581221982	0.003309889	0.00830932	12.84862326	6.982245841	5.09791143	25.44703152	23.01897962	25.6565846	AL121895.2
ENSG00000260236	1.085341298	0.003316004	0.008323519	34.26299536	18.95181014	24.46997486	35.44407962	71.35883681	58.39084772	AC099778.1
ENSG00000247121	1.277537933	0.003337768	0.008373513	11.77790465	24.93659229	10.19582286	39.98819239	32.22657146	41.58136125	AC009126.1
ENSG00000231083	1.139707691	0.003413927	0.008552741	16.06077907	16.95688276	26.50913944	51.8028856	46.03795923	33.61897293	AC011747.1
ENSG00000272221	1.364254664	0.003440347	0.008606278	16.06077907	11.9695643	8.156658288	26.35585408	36.83036738	30.08013367	AL645933.2
ENSG00000100985	1.209537645	0.003440518	0.008606278	12.84862326	16.95688276	17.33289886	30.89996685	41.43416331	37.15781218	MMP9
ENSG00000233170	1.091148197	0.003485914	0.008713824	18.20221628	22.94166491	18.35248115	44.53230516	42.58511229	39.81194163	AC138356.2
ENSG00000262587	1.266162091	0.003496052	0.008736758	17.13149768	10.97210061	17.33289886	39.07936984	44.88701025	25.6565846	AC133552.2
ENSG00000133519	1.394455198	0.003553375	0.008861689	14.99006047	13.96449168	8.156658288	23.62938641	47.18890821	27.42600423	ZDHHC8P1
ENSG00000229325	1.107374553	0.003583205	0.008925034	20.34365349	27.92898336	20.39164572	37.26172473	71.35883681	40.69665144	ACAP2-IT1
ENSG00000117016	1.394553413	0.003624326	0.009016312	108.1425791	117.7007156	125.4086212	139.0498508	425.8511229	359.1921844	RIMS3
ENSG00000182612	1.336250701	0.003633785	0.009038603	36.40443257	10.97210061	9.176240574	54.52935326	54.0946021	33.61897293	TSPAN10
ENSG00000168546	4.476093322	0.003675154	0.009135239	2.14143721	3.989854766	2.039164572	1.817645109	107.0382552	73.43091455	GFRA2
ENSG00000260174	1.339309723	0.003681267	0.009149181	8.56574884	20.94673752	11.21540515	25.44703152	40.28321433	38.042522	AC111152.3
ENSG00000272791	2.022538592	0.003697413	0.00918479	3.212155815	2.992391075	6.117493716	11.81469321	16.11328573	22.11774535	AC073389.3
ENSG00000118473	1.709204165	0.003728625	0.009259266	7.495030235	16.95688276	4.078329144	11.81469321	46.03795923	36.27310237	SGIP1
ENSG00000273274	1.722989865	0.003745605	0.009298885	7.495030235	8.977173224	3.058746858	16.35880598	25.32087758	23.00245516	ZBTB8B
ENSG00000151640	3.2333906	0.003814406	0.009454159	2.14143721	5.984782149	5.09791143	5.452935326	69.05693885	50.42845939	DPYSL4
ENSG00000077264	5.020175753	0.003816997	0.009457994	1.070718605	1.994927383	2.039164572	0.908822554	102.4344593	62.81439679	PAK3
ENSG00000279659	1.566956942	0.003863554	0.009561596	8.56574884	12.96702799	5.09791143	28.17349918	34.52846942	16.80948646	AL451064.2
ENSG00000163735	-1.089520556	0.00387981	0.009592665	36.40443257	49.87318458	47.92036744	26.35585408	21.86803063	15.04006684	CXCL5
ENSG00000130413	1.313577811	0.003926227	0.009699493	10.70718605	12.96702799	13.25456972	30.89996685	35.6794184	25.6565846	STK33
ENSG00000281005	1.467184782	0.003985736	0.009830435	9.636467445	12.96702799	7.137076002	19.08527364	28.77372452	34.50368274	LINC00921
ENSG00000186399	1.909472228	0.004023409	0.009913273	5.353593025	7.979709533	2.039164572	13.63233832	28.77372452	15.92477665	GOLGA8R
ENSG00000152705	1.516685509	0.004023696	0.009913273	11.77790465	4.987318458	12.23498743	30.89996685	34.52846942	17.69419628	CATSPER3
ENSG00000146216	2.288139968	0.00411625	0.010115187	5.353593025	4.987318458	3.058746858	1.817645109	31.07562248	32.73426311	TTBK1
ENSG00000262484	2.053047092	0.00413684	0.010164407	2.14143721	3.989854766	6.117493716	9.997048098	26.47182656	15.04006684	CCER2
ENSG00000075340	6.261461933	0.004220504	0.010358745	0	1.994927383	1.019582286	0.908822554	124.3024899	107.9345973	ADD2
ENSG00000125841	1.044860742	0.004223195	0.010362542	16.06077907	29.92391075	21.41122801	44.53230516	47.18890821	47.77432995	NRSN2
ENSG00000254838	1.207072463	0.004226084	0.010368228	21.4143721	13.96449168	19.37206343	49.98524049	52.94365312	23.88716498	GVINP1
ENSG00000067715	2.079867493	0.004262148	0.010448226	34.26299536	29.92391075	22.43081029	35.44407962	203.7179696	127.3982132	SYT1
ENSG00000238098	1.137376477	0.00428309	0.010495307	25.69724652	17.95434645	13.25456972	33.62643451	42.58511229	48.65903977	ABCA17P
ENSG00000173068	1.411118388	0.004294664	0.010520823	11.77790465	11.9695643	7.137076002	22.72056386	32.22657146	27.42600423	BNC2
ENSG00000141314	1.978460052	0.00431373	0.010560398	2.14143721	5.984782149	5.09791143	9.997048098	24.1699286	18.57890609	RHBDL3
ENSG00000169856	2.048118752	0.004337771	0.010609226	3.212155815	6.982245841	3.058746858	7.270580435	28.77372452	19.46361591	ONECUT1
ENSG00000228044	1.097057214	0.004397457	0.010733489	20.34365349	22.94166491	16.31331658	33.62643451	52.94365312	41.58136125	AL160408.1
ENSG00000214870	1.116369443	0.004439222	0.01082523	13.91934186	17.95434645	28.54830401	44.53230516	51.79270413	35.38839256	AC004540.1
ENSG00000008735	2.046645437	0.004446112	0.010840573	24.62652791	18.95181014	18.35248115	24.53820897	136.9629287	94.66395009	MAPK8IP2
ENSG00000110436	2.072506625	0.004479732	0.010918143	6.42431163	1.994927383	7.137076002	5.452935326	39.13226535	21.23303553	SLC1A2
ENSG00000142065	1.003890953	0.004588054	0.011152169	28.90940233	20.94673752	27.52872172	42.71466005	69.05693885	44.2354907	ZFP14
ENSG00000245552	1.635911507	0.004668882	0.011336482	5.353593025	3.989854766	12.23498743	20.90291875	24.1699286	22.11774535	AP000787.1
ENSG00000231887	1.141827122	0.004680152	0.011362323	21.4143721	20.94673752	12.23498743	31.8087894	48.33985719	40.69665144	PRH1
ENSG00000142303	1.291275637	0.004681537	0.011364165	19.27293489	9.974636916	15.29373429	21.8117413	49.49080617	38.042522	ADAMTS10
ENSG00000257556	1.449066638	0.004696296	0.011396939	11.77790465	9.974636916	7.137076002	26.35585408	33.37752044	19.46361591	LINC02298
ENSG00000188385	1.032704314	0.004706487	0.011418616	33.19227675	19.94927383	22.43081029	46.34995027	69.05693885	39.81194163	JAKMIP3
ENSG00000198003	1.931053837	0.004716686	0.011440298	9.636467445	2.992391075	3.058746858	31.8087894	14.96233675	12.38593739	CCDC151
ENSG00000137766	1.814286825	0.00487884	0.011799204	3.212155815	4.987318458	7.137076002	15.44998342	23.01897962	15.92477665	UNC13C
ENSG00000274292	1.272124499	0.004885104	0.011810878	13.91934186	13.96449168	12.23498743	35.44407962	21.86803063	38.92723181	AC084018.2
ENSG00000279865	1.146648597	0.004904197	0.01184788	14.99006047	13.96449168	21.41122801	40.89701495	37.98131637	32.73426311	AC006511.3
ENSG00000156222	-1.396649675	0.004932041	0.011903726	40.68730699	30.92137444	19.37206343	11.81469321	16.11328573	7.077678511	SLC28A1
ENSG00000145362	1.689690149	0.004949387	0.011937647	96.36467445	87.77680486	86.66449431	99.97048098	420.096378	353.8839256	ANK2
ENSG00000152578	3.903596027	0.004955146	0.01194677	3.212155815	0	3.058746858	4.544112772	51.79270413	37.15781218	GRIA4
ENSG00000263050	1.391638998	0.005052644	0.012159204	7.495030235	14.96195537	9.176240574	26.35585408	23.01897962	33.61897293	AC090617.5
ENSG00000244257	1.823864591	0.005112065	0.012287523	8.56574884	1.994927383	5.09791143	19.9940962	17.26423471	17.69419628	PKD1P1
ENSG00000253591	1.624267091	0.005137205	0.012341407	6.42431163	9.974636916	4.078329144	20.90291875	23.01897962	19.46361591	AC027312.1
ENSG00000188897	1.118939712	0.005161083	0.012392203	20.34365349	18.95181014	13.25456972	36.35290217	42.58511229	35.38839256	AC099489.1
ENSG00000048740	1.467839867	0.005255508	0.012600573	10.70718605	14.96195537	12.23498743	12.72351576	58.69839802	34.50368274	CELF2
ENSG00000274213	-1.187958875	0.005301019	0.012701293	43.8994628	34.91122921	28.54830401	11.81469321	20.71708165	15.04006684	AC015912.3
ENSG00000169862	1.947697948	0.005368328	0.012836608	27.83868373	21.94420121	11.21540515	29.99114429	127.7553369	77.85446362	CTNND2
ENSG00000257925	-1.871422649	0.00539106	0.012882985	11.77790465	17.95434645	22.43081029	7.270580435	2.301897962	4.42354907	AC008083.1
ENSG00000165323	5.981845775	0.005396481	0.012889145	0	0.997463692	0	0.908822554	34.52846942	34.50368274	FAT3
ENSG00000271225	-1.305621308	0.005404635	0.012906921	38.54586978	25.93405598	30.58746858	7.270580435	18.41518369	13.27064721	BNIP3P4
ENSG00000124302	4.171793359	0.005413647	0.012922555	0	2.992391075	1.019582286	2.726467663	36.83036738	33.61897293	CHST8
ENSG00000166448	2.308195101	0.005442466	0.012978464	3.212155815	1.994927383	5.09791143	2.726467663	26.47182656	22.11774535	TMEM130
ENSG00000231187	1.569996403	0.005458856	0.013014126	7.495030235	10.97210061	4.078329144	19.08527364	24.1699286	23.88716498	AL356056.2
ENSG00000262188	2.01264598	0.005498261	0.013104621	8.56574884	3.989854766	2.039164572	7.270580435	18.41518369	32.73426311	LINC01978
ENSG00000092051	4.878734963	0.005509885	0.013128877	2.14143721	1.994927383	0	1.817645109	70.20788783	49.54374958	JPH4
ENSG00000149922	-1.125454231	0.005522085	0.013154489	40.68730699	35.9086929	34.66579772	16.35880598	21.86803063	13.27064721	TBX6
ENSG00000153563	1.005145886	0.005537616	0.013188021	26.76796512	27.92898336	15.29373429	47.25877283	47.18890821	46.00491032	CD8A
ENSG00000197859	1.62922008	0.005636318	0.013402108	7.495030235	5.984782149	7.137076002	12.72351576	26.47182656	24.77187479	ADAMTSL2
ENSG00000169918	1.890082628	0.005640166	0.013407594	2.14143721	5.984782149	7.137076002	9.088225544	28.77372452	19.46361591	OTUD7A
ENSG00000229589	1.618251096	0.005667919	0.013467162	5.353593025	6.982245841	8.156658288	14.54116087	27.62277554	21.23303553	ACVR2B-AS1
ENSG00000234338	1.582504674	0.005680728	0.013494999	9.636467445	4.987318458	8.156658288	25.44703152	28.77372452	14.15535702	AC073349.2
ENSG00000166432	1.317102718	0.0056814	0.013494999	7.495030235	18.95181014	13.25456972	26.35585408	47.18890821	26.54129442	ZMAT1
ENSG00000149295	5.904246506	0.005720687	0.01357587	0	0.997463692	0	0.908822554	37.98131637	27.42600423	DRD2
ENSG00000234800	1.736083237	0.005739273	0.013614632	6.42431163	2.992391075	7.137076002	18.17645109	17.26423471	19.46361591	PCMTD1P3
ENSG00000255100	1.220116004	0.005787677	0.013725862	11.77790465	21.94420121	11.21540515	35.44407962	42.58511229	27.42600423	AP003119.2
ENSG00000282907	1.575710272	0.005806381	0.013767977	14.99006047	7.979709533	4.078329144	36.35290217	29.9246735	14.15535702	Z98883.1
ENSG00000157654	-1.351828856	0.005806954	0.013767977	24.62652791	36.90615659	22.43081029	8.179402989	11.50948981	13.27064721	PALM2-AKAP2
ENSG00000145934	1.458275017	0.005816141	0.013786155	11.77790465	6.982245841	9.176240574	16.35880598	32.22657146	28.31071405	TENM2
ENSG00000186377	1.795726698	0.005843554	0.013845702	9.636467445	3.989854766	3.058746858	24.53820897	20.71708165	12.38593739	CYP4X1
ENSG00000250539	-1.010389854	0.005887797	0.013943244	43.8994628	51.86811196	37.72454458	23.62938641	25.32087758	17.69419628	KRT8P33
ENSG00000107147	2.07624298	0.005941232	0.014056936	6.42431163	2.992391075	3.058746858	5.452935326	28.77372452	18.57890609	KCNT1
ENSG00000227051	2.281653476	0.005948083	0.014065804	33.19227675	35.9086929	27.52872172	31.8087894	254.3597248	184.0196413	C14orf132
ENSG00000172348	1.42764248	0.005970532	0.01411153	14.99006047	14.96195537	6.117493716	16.35880598	49.49080617	31.8495533	RCAN2
ENSG00000169989	1.085855435	0.006006117	0.014184544	13.91934186	22.94166491	24.46997486	58.16464348	35.6794184	36.27310237	TIGD4
ENSG00000275481	1.002529696	0.00601152	0.014191758	27.83868373	19.94927383	19.37206343	50.89406304	42.58511229	40.69665144	AC025031.4
ENSG00000256312	1.794097815	0.006020872	0.014211986	3.212155815	7.979709533	4.078329144	21.8117413	17.26423471	14.15535702	AC138466.1
ENSG00000131400	1.32660454	0.006065221	0.014298839	13.91934186	12.96702799	8.156658288	35.44407962	32.22657146	20.34832572	NAPSA
ENSG00000224616	1.333385783	0.006099672	0.014371797	11.77790465	17.95434645	7.137076002	23.62938641	27.62277554	41.58136125	RTCA-AS1
ENSG00000148798	7.014692707	0.006102787	0.014377269	2.14143721	3.989854766	0	0.908822554	447.7191535	345.0368274	INA
ENSG00000278396	1.247839678	0.006164251	0.014508873	11.77790465	13.96449168	12.23498743	27.26467663	26.47182656	36.27310237	AL122023.1
ENSG00000114631	1.087744466	0.006185415	0.01455302	29.98012094	33.91376551	20.39164572	27.26467663	87.47212254	65.46852623	PODXL2
ENSG00000157404	1.313016563	0.006192198	0.014567089	17.13149768	10.97210061	8.156658288	34.53525707	33.37752044	22.11774535	KIT
ENSG00000144712	1.401141861	0.006194468	0.014570539	8.56574884	6.982245841	13.25456972	22.72056386	28.77372452	24.77187479	CAND2
ENSG00000153707	4.398269212	0.006200861	0.014581793	3.212155815	0.997463692	0	2.726467663	51.79270413	33.61897293	PTPRD
ENSG00000186642	1.34953248	0.006225156	0.014637026	17.13149768	7.979709533	18.35248115	16.35880598	44.88701025	49.54374958	PDE2A
ENSG00000149201	1.413471559	0.006241454	0.014671543	8.56574884	13.96449168	7.137076002	19.08527364	26.47182656	33.61897293	CCDC81
ENSG00000173557	-1.11775511	0.006257844	0.014706257	59.96024188	39.89854766	33.64621544	19.9940962	29.9246735	12.38593739	C2orf70
ENSG00000229816	1.485107931	0.00626139	0.014712685	17.13149768	3.989854766	8.156658288	29.08232174	32.22657146	20.34832572	DDX50P1
ENSG00000267259	1.242948559	0.006307133	0.014810573	10.70718605	17.95434645	10.19582286	29.99114429	32.22657146	30.08013367	ERVE-1
ENSG00000232450	1.114425936	0.006335966	0.014870576	16.06077907	16.95688276	19.37206343	47.25877283	37.98131637	28.31071405	AL133517.1
ENSG00000204052	1.469132588	0.006371103	0.01494724	7.495030235	7.979709533	9.176240574	19.9940962	20.71708165	27.42600423	LRRC73
ENSG00000120784	1.759809005	0.006376603	0.014956273	6.42431163	8.977173224	4.078329144	8.179402989	34.52846942	23.88716498	ZFP30
ENSG00000234567	1.475074094	0.006387571	0.014980059	5.353593025	8.977173224	12.23498743	18.17645109	33.37752044	23.00245516	AL024497.2
ENSG00000184613	2.617431294	0.006401729	0.015009382	8.56574884	3.989854766	18.35248115	15.44998342	92.07591846	82.27801269	NELL2
ENSG00000144229	5.975250779	0.006438182	0.015087046	1.070718605	0	0	0.908822554	44.88701025	23.88716498	THSD7B
ENSG00000120341	1.700131963	0.00649153	0.015202236	4.28287442	5.984782149	7.137076002	13.63233832	17.26423471	25.6565846	SEC16B
ENSG00000203497	1.377468781	0.006509528	0.015242416	21.4143721	8.977173224	5.09791143	31.8087894	28.77372452	30.96484349	PDCD4-AS1
ENSG00000256061	1.057260885	0.006584623	0.015406318	20.34365349	12.96702799	31.60705087	51.8028856	41.43416331	41.58136125	DNAAF4
ENSG00000144619	5.893898734	0.006663649	0.01556912	0	0	1.019582286	0.908822554	43.73606127	21.23303553	CNTN4
ENSG00000113657	2.205739059	0.006684196	0.015607074	173.456414	171.563755	152.9373429	150.864544	1152.09993	994.4138308	DPYSL3
ENSG00000107518	2.64209752	0.006710504	0.015654389	8.56574884	3.989854766	5.09791143	6.36175788	58.69839802	45.12020051	ATRNL1
ENSG00000272721	1.598792749	0.006724765	0.015679371	4.28287442	6.982245841	8.156658288	19.08527364	19.56613267	20.34832572	AC131235.3
ENSG00000226711	1.220654278	0.006743706	0.01571769	14.99006047	8.977173224	18.35248115	26.35585408	32.22657146	39.81194163	FAM66C
ENSG00000175697	1.46047557	0.006755599	0.015743386	7.495030235	10.97210061	9.176240574	14.54116087	35.6794184	26.54129442	GPR156
ENSG00000241475	1.53830266	0.0067733	0.01578058	5.353593025	11.9695643	11.21540515	14.54116087	48.33985719	21.23303553	AL160408.4
ENSG00000250742	1.478128354	0.006807748	0.015850654	9.636467445	6.982245841	7.137076002	23.62938641	23.01897962	19.46361591	LINC02381
ENSG00000272144	1.236596452	0.006840836	0.015913391	10.70718605	12.96702799	17.33289886	31.8087894	42.58511229	23.00245516	AC025171.4
ENSG00000240086	1.421729715	0.006855908	0.015942316	9.636467445	10.97210061	6.117493716	20.90291875	24.1699286	26.54129442	AC128689.1
ENSG00000235280	1.785712842	0.006917418	0.016068862	4.28287442	5.984782149	4.078329144	19.08527364	17.26423471	13.27064721	MCF2L-AS1
ENSG00000254461	1.057265188	0.006930185	0.016092336	28.90940233	20.94673752	17.33289886	30.89996685	64.45314292	45.12020051	AP001107.4
ENSG00000109991	8.016372174	0.006962498	0.016159092	0	1.994927383	0	0.908822554	285.4353472	235.3328105	P2RX3
ENSG00000261534	1.686148112	0.007026825	0.016283376	10.70718605	1.994927383	6.117493716	17.26762853	20.71708165	22.11774535	AL596244.1
ENSG00000235618	1.326557225	0.007034471	0.016299012	12.84862326	10.97210061	9.176240574	34.53525707	28.77372452	19.46361591	FAM21EP
ENSG00000154864	8.445519886	0.007090641	0.016410285	2.14143721	0	0	0.908822554	424.7001739	312.3025643	PIEZO2
ENSG00000259321	1.112940937	0.007106781	0.01644554	11.77790465	19.94927383	18.35248115	30.89996685	37.98131637	39.81194163	AL136295.2
ENSG00000233327	1.076583285	0.007144722	0.01652912	27.83868373	15.95941907	14.274152	34.53525707	47.18890821	40.69665144	USP32P2
ENSG00000089847	1.19557533	0.007146883	0.01653201	19.27293489	10.97210061	15.29373429	27.26467663	48.33985719	29.19542386	ANKRD24
ENSG00000148408	3.882375868	0.007162355	0.016565686	5.353593025	2.992391075	3.058746858	1.817645109	87.47212254	78.73917344	CACNA1B
ENSG00000268912	1.112523222	0.00716491	0.016569483	10.70718605	18.95181014	21.41122801	40.89701495	33.37752044	36.27310237	AC012313.5
ENSG00000183023	2.047508201	0.007181488	0.016603585	3.212155815	0.997463692	8.156658288	7.270580435	21.86803063	22.11774535	SLC8A1
ENSG00000183775	4.939751082	0.007189388	0.016619731	0	0.997463692	3.058746858	1.817645109	78.26453069	45.12020051	KCTD16
ENSG00000102003	2.891145353	0.007230462	0.016695526	26.76796512	22.94166491	15.29373429	16.35880598	270.4730105	195.5208689	SYP
ENSG00000258602	-1.569397648	0.007329384	0.016893825	16.06077907	25.93405598	18.35248115	8.179402989	6.905693885	5.308258883	LINC01629
ENSG00000267370	1.639730528	0.00733321	0.016898347	6.42431163	6.982245841	6.117493716	19.9940962	29.9246735	11.50122758	AC008752.3
ENSG00000257815	1.22693559	0.007382723	0.016999481	8.56574884	19.94927383	12.23498743	27.26467663	32.22657146	36.27310237	LINC01481
ENSG00000156298	2.9875465	0.007483922	0.017201921	12.84862326	4.987318458	8.156658288	7.270580435	97.83066337	100.8569188	TSPAN7
ENSG00000261064	1.674621488	0.007539413	0.017316299	11.77790465	3.989854766	4.078329144	25.44703152	25.32087758	12.38593739	LINC02256
ENSG00000261115	2.515555576	0.007581062	0.01740261	14.99006047	8.977173224	11.21540515	10.90587065	111.6420511	78.73917344	TMEM178B
ENSG00000262903	1.046939138	0.007601284	0.017434111	20.34365349	13.96449168	23.45039258	38.17054728	46.03795923	35.38839256	AC027796.4
ENSG00000279066	1.608827898	0.007644163	0.017521376	7.495030235	4.987318458	6.117493716	18.17645109	16.11328573	22.11774535	HEXDC-IT1
ENSG00000157680	5.008313541	0.007691935	0.017621965	0	1.994927383	0	1.817645109	33.37752044	30.08013367	DGKI
ENSG00000183117	7.474440841	0.007704769	0.017649137	0	0	0	0.908822554	54.0946021	46.00491032	CSMD1
ENSG00000138347	-1.089049182	0.007716836	0.017672315	41.75802559	41.89347505	28.54830401	19.08527364	20.71708165	13.27064721	MYPN
ENSG00000066032	7.796146688	0.007723855	0.017686155	0	0	0	0.908822554	71.35883681	53.96729865	CTNNA2
ENSG00000145920	6.9440447	0.007740766	0.017715929	0	0	0	0.908822554	34.52846942	34.50368274	CPLX2
ENSG00000162444	-1.006252183	0.007757561	0.017752127	41.75802559	35.9086929	49.95953201	22.72056386	25.32087758	15.92477665	RBP7
ENSG00000176049	7.154278314	0.007785791	0.017805491	0	0	0	0.908822554	43.73606127	36.27310237	JAKMIP2
ENSG00000163618	7.469313512	0.007789836	0.017812497	0	0	0	0.908822554	56.39650006	43.35078088	CADPS
ENSG00000177875	7.329485952	0.007798851	0.017826367	0	0	0	0.908822554	50.64175515	39.81194163	CCDC184
ENSG00000178660	-1.03629329	0.007845544	0.0179218	50.32377443	43.88840243	35.68538001	15.44998342	31.07562248	17.69419628	ARMC10P1
ENSG00000066735	1.554431492	0.007956379	0.018149833	8.56574884	8.977173224	8.156658288	9.088225544	36.83036738	30.08013367	KIF26A
ENSG00000101204	6.910413177	0.007984919	0.018208066	0	0	0	0.908822554	39.13226535	28.31071405	CHRNA4
ENSG00000102935	1.829886958	0.007987639	0.018211978	4.28287442	3.989854766	7.137076002	7.270580435	27.62277554	20.34832572	ZNF423
ENSG00000146250	1.837978889	0.008010023	0.018253833	1.070718605	1.994927383	16.31331658	27.26467663	17.26423471	24.77187479	PRSS35
ENSG00000136928	5.611638586	0.008030092	0.018292671	2.14143721	0	0	1.817645109	58.69839802	42.46607107	GABBR2
ENSG00000177990	1.31718525	0.00807619	0.018381519	16.06077907	15.95941907	4.078329144	31.8087894	28.77372452	29.19542386	DPY19L2
ENSG00000274270	1.378714688	0.008108666	0.018450801	9.636467445	6.982245841	11.21540515	25.44703152	27.62277554	19.46361591	AL137060.1
ENSG00000125851	1.140445414	0.008110407	0.018452449	20.34365349	24.93659229	18.35248115	19.9940962	64.45314292	56.62142809	PCSK2
ENSG00000137968	1.556623307	0.008118518	0.018463952	5.353593025	6.982245841	10.19582286	11.81469321	26.47182656	28.31071405	SLC44A5
ENSG00000196890	1.281846135	0.008235587	0.018702055	5.353593025	12.96702799	23.45039258	37.26172473	25.32087758	38.92723181	HIST3H2BB
ENSG00000150076	1.562145191	0.008262089	0.018750495	6.42431163	6.982245841	6.117493716	17.26762853	17.26423471	23.00245516	NA
ENSG00000160097	1.794305996	0.008266208	0.018755149	22.4850907	16.95688276	16.31331658	19.9940962	96.67971439	76.96975381	FNDC5
ENSG00000174460	4.009872614	0.008292674	0.018810491	2.14143721	0	4.078329144	3.635290217	57.54744904	38.92723181	ZCCHC12
ENSG00000263551	1.081696539	0.008396453	0.019031609	27.83868373	23.9391286	10.19582286	42.71466005	55.24555108	33.61897293	AP005328.1
ENSG00000197872	1.83912694	0.008522195	0.019302144	8.56574884	7.979709533	4.078329144	3.635290217	36.83036738	33.61897293	FAM49A
ENSG00000138650	1.765219071	0.008554008	0.019364523	8.56574884	9.974636916	6.117493716	3.635290217	42.58511229	38.042522	PCDH10
ENSG00000169783	3.819036862	0.008610495	0.019480238	5.353593025	2.992391075	2.039164572	1.817645109	89.7740205	54.85200846	LINGO1
ENSG00000184492	1.503990292	0.008651075	0.019559843	7.495030235	5.984782149	8.156658288	23.62938641	21.86803063	15.92477665	FOXD4L1
ENSG00000210184	-1.08069526	0.008840732	0.019953821	42.8287442	45.88332981	26.50913944	21.8117413	19.56613267	13.27064721	MT-TS2
ENSG00000135472	3.975647316	0.008861767	0.019998808	2.14143721	2.992391075	2.039164572	0.908822554	56.39650006	55.73671828	FAIM2
ENSG00000135111	2.503985072	0.008921923	0.020122043	14.99006047	5.984782149	12.23498743	10.90587065	97.83066337	79.62388325	TBX3
ENSG00000204176	1.194654265	0.00901225	0.02031313	7.495030235	16.95688276	18.35248115	29.99114429	41.43416331	27.42600423	SYT15
ENSG00000187372	1.419948749	0.009070732	0.020437324	8.56574884	6.982245841	15.29373429	17.26762853	44.88701025	21.23303553	PCDHB13
ENSG00000234883	-1.062166909	0.009127415	0.020547164	48.18233722	43.88840243	41.80287373	18.17645109	35.6794184	11.50122758	MIR155HG
ENSG00000276814	-1.438277553	0.009265061	0.020836332	19.27293489	20.94673752	22.43081029	7.270580435	6.905693885	8.847098139	AC004801.6
ENSG00000154118	1.043684819	0.009289166	0.020880185	21.4143721	20.94673752	20.39164572	25.44703152	58.69839802	46.00491032	JPH3
ENSG00000260193	1.590001893	0.009387356	0.021069554	4.28287442	2.992391075	17.33289886	16.35880598	28.77372452	29.19542386	AL138781.1
ENSG00000233554	1.20680211	0.009411057	0.021117522	16.06077907	17.95434645	9.176240574	20.90291875	44.88701025	34.50368274	B4GALT1-AS1
ENSG00000196811	1.648278393	0.009436306	0.02116632	3.212155815	7.979709533	8.156658288	27.26467663	24.1699286	9.731807953	CHRNG
ENSG00000167889	1.003941393	0.009514384	0.021320357	27.83868373	30.92137444	23.45039258	27.26467663	79.41547967	59.27555753	MGAT5B
ENSG00000156886	1.279632975	0.009832611	0.021952073	11.77790465	8.977173224	12.23498743	24.53820897	35.6794184	20.34832572	ITGAD
ENSG00000181585	-1.13976963	0.009838169	0.021961778	25.69724652	37.90362028	38.74412687	12.72351576	23.01897962	11.50122758	TMIE
ENSG00000276404	-1.088239914	0.009866336	0.022016524	37.47515117	41.89347505	26.50913944	18.17645109	19.56613267	12.38593739	MIR6835
ENSG00000178033	1.134688024	0.009915274	0.022109402	17.13149768	16.95688276	23.45039258	19.9940962	62.15124496	45.12020051	CALHM5
ENSG00000272301	1.219343876	0.009942681	0.022165064	13.91934186	9.974636916	15.29373429	40.89701495	29.9246735	20.34832572	AP002360.3
ENSG00000104324	1.143087602	0.01003838	0.02235367	18.20221628	10.97210061	13.25456972	27.26467663	34.52846942	31.8495533	CPQ
ENSG00000261924	1.598680265	0.010047326	0.022368099	4.28287442	8.977173224	5.09791143	20.90291875	21.86803063	13.27064721	AC127496.1
ENSG00000261616	1.157267806	0.010067243	0.022404186	10.70718605	20.94673752	14.274152	29.99114429	25.32087758	46.88962014	AC036108.3
ENSG00000271551	1.784328532	0.010136748	0.022545033	2.14143721	2.992391075	9.176240574	13.63233832	17.26423471	18.57890609	AL355297.4
ENSG00000116141	1.590645772	0.010142411	0.022552094	22.4850907	29.92391075	32.62663315	39.98819239	154.2271634	62.81439679	MARK1
ENSG00000122756	2.306703056	0.010212519	0.022699633	14.99006047	12.96702799	4.078329144	15.44998342	95.5287654	47.77432995	CNTFR
ENSG00000211770	-1.11321026	0.010221461	0.022713941	36.40443257	28.92644706	42.82245601	9.088225544	21.86803063	19.46361591	TRBJ2-6
ENSG00000188958	4.020582981	0.010293717	0.0228605	3.212155815	0.997463692	2.039164572	0.908822554	58.69839802	41.58136125	UTS2B
ENSG00000133640	1.358137402	0.010329548	0.022928841	7.495030235	9.974636916	12.23498743	27.26467663	34.52846942	15.04006684	LRRIQ1
ENSG00000243004	-1.15868624	0.01053402	0.023348415	37.47515117	30.92137444	31.60705087	9.088225544	24.1699286	12.38593739	AC005062.1
ENSG00000082196	1.187478749	0.010544792	0.023368604	13.91934186	9.974636916	14.274152	22.72056386	33.37752044	30.96484349	C1QTNF3
ENSG00000279812	1.664268163	0.010619276	0.023520134	5.353593025	3.989854766	7.137076002	19.9940962	21.86803063	10.61651777	AC120057.4
ENSG00000255036	1.297975142	0.010672261	0.023620177	13.91934186	11.9695643	6.117493716	26.35585408	32.22657146	20.34832572	AL512590.3
ENSG00000248626	-1.276773378	0.010670929	0.023620177	29.98012094	21.94420121	24.46997486	11.81469321	6.905693885	12.38593739	GAPDHP40
ENSG00000272787	1.307924414	0.010699295	0.023674229	9.636467445	7.979709533	11.21540515	26.35585408	21.86803063	23.00245516	AC253536.6
ENSG00000271966	1.356250266	0.010827792	0.023923524	11.77790465	9.974636916	6.117493716	17.26762853	27.62277554	26.54129442	AC021321.1
ENSG00000117971	1.474218034	0.010899703	0.024067744	5.353593025	11.9695643	6.117493716	20.90291875	29.9246735	15.04006684	CHRNB4
ENSG00000281912	1.321537908	0.01098831	0.024248635	8.56574884	9.974636916	9.176240574	26.35585408	20.71708165	22.11774535	LINC01144
ENSG00000130294	2.222096362	0.01100621	0.024282226	91.01108142	103.7362239	105.0169755	78.15873967	760.7772763	560.0213122	KIF1A
ENSG00000183908	6.379937275	0.011032233	0.024324839	0	1.994927383	0	0.908822554	95.5287654	71.66149493	LRRC55
ENSG00000251819	1.389678644	0.011048824	0.024350667	10.70718605	5.984782149	9.176240574	16.35880598	27.62277554	23.88716498	RNU6-322P
ENSG00000263345	1.182328342	0.01105194	0.024353486	25.69724652	6.982245841	13.25456972	34.53525707	29.9246735	38.92723181	AC006435.2
ENSG00000113361	4.850786201	0.011159957	0.024568886	2.14143721	1.994927383	0	0.908822554	67.90598987	50.42845939	CDH6
ENSG00000255277	1.053094541	0.011530272	0.025300667	19.27293489	10.97210061	21.41122801	33.62643451	33.37752044	39.81194163	ABCC6P2
ENSG00000273008	1.142605127	0.011629286	0.025483243	14.99006047	9.974636916	16.31331658	30.89996685	35.6794184	24.77187479	AC010864.1
ENSG00000237437	-1.504058804	0.011641994	0.025508007	16.06077907	32.91630182	19.37206343	5.452935326	14.96233675	4.42354907	ASS1P12
ENSG00000212237	1.406638902	0.011733015	0.025682612	13.91934186	10.97210061	3.058746858	19.9940962	21.86803063	31.8495533	RNA5SP18
ENSG00000264425	-1.903037442	0.011743227	0.025698761	34.26299536	14.96195537	7.137076002	9.997048098	1.150948981	3.538839256	MIR4653
ENSG00000262294	1.528541982	0.011897559	0.026001981	13.91934186	5.984782149	3.058746858	25.44703152	26.47182656	14.15535702	AC129507.2
ENSG00000112175	2.507569048	0.011984002	0.026146782	11.77790465	5.984782149	6.117493716	7.270580435	81.71737764	46.88962014	BMP5
ENSG00000235314	1.232101426	0.012014971	0.026208043	9.636467445	6.982245841	21.41122801	32.71761196	31.07562248	25.6565846	LINC00957
ENSG00000140937	1.327100776	0.012056518	0.026292344	17.13149768	8.977173224	6.117493716	17.26762853	28.77372452	34.50368274	CDH11
ENSG00000233967	1.16522666	0.012063584	0.026304589	12.84862326	10.97210061	13.25456972	30.89996685	26.47182656	25.6565846	AL359715.1
ENSG00000232324	-1.688030548	0.012086898	0.026349089	14.99006047	15.95941907	20.39164572	5.452935326	1.150948981	8.847098139	AC008440.3
ENSG00000160716	2.784604428	0.012557078	0.027262631	6.42431163	3.989854766	5.09791143	3.635290217	64.45314292	38.92723181	CHRNB2
ENSG00000129675	1.467846957	0.012561005	0.027267892	8.56574884	5.984782149	8.156658288	12.72351576	31.07562248	19.46361591	ARHGEF6
ENSG00000197816	1.000334573	0.01256387	0.027270846	31.05083954	18.95181014	12.23498743	44.53230516	36.83036738	42.46607107	CCDC180
ENSG00000099617	-1.212950319	0.012752491	0.027653781	18.20221628	32.91630182	34.66579772	8.179402989	14.96233675	14.15535702	EFNA2
ENSG00000272374	1.404293428	0.012777553	0.02769819	11.77790465	10.97210061	4.078329144	14.54116087	31.07562248	25.6565846	Z97832.2
ENSG00000259088	1.959614174	0.012796253	0.027732098	0	1.994927383	10.19582286	15.44998342	17.26423471	15.04006684	AL137779.2
ENSG00000134769	2.267827129	0.012897654	0.027905163	33.19227675	28.92644706	16.31331658	21.8117413	196.8122757	159.2477665	DTNA
ENSG00000182636	1.61164474	0.012965572	0.028035383	8.56574884	3.989854766	7.137076002	8.179402989	31.07562248	21.23303553	NDN
ENSG00000068615	2.777678973	0.012991549	0.028084855	29.98012094	36.90615659	22.43081029	16.35880598	329.1714085	267.1823638	REEP1
ENSG00000222764	1.471517872	0.013002861	0.028105959	5.353593025	7.979709533	7.137076002	23.62938641	17.26423471	15.92477665	RN7SKP106
ENSG00000236358	1.552435233	0.013063572	0.028217005	4.28287442	6.982245841	6.117493716	17.26762853	16.11328573	17.69419628	AL355472.3
ENSG00000125355	4.023506369	0.013242754	0.028566602	2.14143721	0	3.058746858	1.817645109	47.18890821	35.38839256	TMEM255A
ENSG00000229782	-1.247843137	0.013396427	0.028863761	31.05083954	21.94420121	22.43081029	8.179402989	9.207591846	14.15535702	AC118754.1
ENSG00000139910	1.499575079	0.013540413	0.029125542	7.495030235	4.987318458	11.21540515	9.997048098	34.52846942	23.00245516	NOVA1
ENSG00000135604	-1.200983716	0.013625618	0.029291445	26.76796512	30.92137444	23.45039258	13.63233832	14.96233675	7.077678511	STX11
ENSG00000279133	-1.104220162	0.013698806	0.029431334	38.54586978	43.88840243	20.39164572	18.17645109	18.41518369	11.50122758	AC018628.1
ENSG00000160460	1.294617006	0.013705153	0.02944025	7.495030235	16.95688276	7.137076002	18.17645109	28.77372452	30.96484349	SPTBN4
ENSG00000273080	1.167501401	0.013706204	0.02944025	11.77790465	13.96449168	10.19582286	25.44703152	24.1699286	30.96484349	AC009309.1
ENSG00000244968	1.075300163	0.01397778	0.029942007	11.77790465	18.95181014	14.274152	36.35290217	32.22657146	26.54129442	LIFR-AS1
ENSG00000093134	1.397380625	0.014003246	0.029981267	4.28287442	10.97210061	9.176240574	15.44998342	26.47182656	23.00245516	VNN3
ENSG00000135517	1.362660941	0.014065948	0.030105976	8.56574884	7.979709533	7.137076002	20.90291875	19.56613267	20.34832572	MIP
ENSG00000264575	1.013165258	0.014071018	0.030113275	14.99006047	20.94673752	15.29373429	31.8087894	40.28321433	31.8495533	LINC00526
ENSG00000227542	1.260450902	0.014139926	0.030250033	13.91934186	13.96449168	5.09791143	19.9940962	29.9246735	29.19542386	AC092614.1
ENSG00000150471	2.296140381	0.014144115	0.030255425	21.4143721	19.94927383	27.52872172	16.35880598	180.69899	141.5535702	ADGRL3
ENSG00000235475	1.609676147	0.014172179	0.030311881	7.495030235	2.992391075	6.117493716	13.63233832	23.01897962	14.15535702	LINC01372
ENSG00000225693	1.669986124	0.014193873	0.030347541	5.353593025	5.984782149	3.058746858	17.26762853	11.50948981	16.80948646	LAGE3P1
ENSG00000184524	1.638040947	0.01420496	0.030367665	5.353593025	2.992391075	8.156658288	9.997048098	23.01897962	18.57890609	CEND1
ENSG00000100593	1.572860696	0.014384398	0.030711443	11.77790465	0.997463692	9.176240574	29.99114429	20.71708165	14.15535702	ISM2
ENSG00000185269	-1.173159741	0.014588228	0.031095374	28.90940233	26.93151967	28.54830401	19.08527364	9.207591846	8.847098139	NOTUM
ENSG00000198468	1.090082365	0.014621779	0.031156267	12.84862326	17.95434645	13.25456972	22.72056386	37.98131637	33.61897293	FLVCR1-AS1
ENSG00000259940	1.501696787	0.014644712	0.0312011	6.42431163	8.977173224	4.078329144	17.26762853	24.1699286	14.15535702	AC109449.1
ENSG00000211768	-1.460476607	0.014766429	0.031423501	16.06077907	17.95434645	19.37206343	6.36175788	6.905693885	6.192968697	TRBJ2-4
ENSG00000227038	1.138865825	0.014768693	0.031424632	7.495030235	20.94673752	18.35248115	29.99114429	49.49080617	24.77187479	GTF2IP7
ENSG00000143494	1.027184941	0.014887774	0.031663148	13.91934186	35.9086929	18.35248115	30.89996685	67.90598987	41.58136125	VASH2
ENSG00000160282	1.568881655	0.01494933	0.031775078	3.212155815	13.96449168	4.078329144	29.08232174	23.01897962	11.50122758	FTCD
ENSG00000283445	1.132271554	0.014964776	0.031793643	16.06077907	13.96449168	12.23498743	27.26467663	44.88701025	21.23303553	AL136985.3
ENSG00000248538	-1.142162531	0.015131354	0.032102122	24.62652791	21.94420121	40.78329144	11.81469321	12.66043879	15.04006684	AC022784.1
ENSG00000196220	1.896415132	0.015210552	0.032254397	21.4143721	13.96449168	10.19582286	16.35880598	97.83066337	55.73671828	SRGAP3
ENSG00000214274	-1.210086219	0.015208705	0.032254397	32.12155815	21.94420121	22.43081029	13.63233832	11.50948981	7.962388325	ANG
ENSG00000171060	1.209433334	0.015482898	0.032763613	12.84862326	19.94927383	5.09791143	23.62938641	33.37752044	30.96484349	C8orf74
ENSG00000137098	1.316297603	0.015532196	0.032860262	12.84862326	7.979709533	8.156658288	13.63233832	32.22657146	26.54129442	SPAG8
ENSG00000250596	1.642405939	0.015551232	0.032896698	3.212155815	8.977173224	3.058746858	15.44998342	18.41518369	14.15535702	AC096751.1
ENSG00000236423	1.353891206	0.015719197	0.03321326	7.495030235	10.97210061	8.156658288	34.53525707	18.41518369	15.04006684	LINC01134
ENSG00000229155	1.08206434	0.015901852	0.033556184	19.27293489	7.979709533	18.35248115	34.53525707	28.77372452	32.73426311	LINC02038
ENSG00000279713	1.70485612	0.015922413	0.033595661	7.495030235	1.994927383	6.117493716	11.81469321	28.77372452	10.61651777	AC080038.3
ENSG00000125508	-1.251632932	0.015991866	0.033712215	18.20221628	44.88586612	22.43081029	16.35880598	12.66043879	7.077678511	SRMS
ENSG00000164929	4.266614607	0.016003089	0.03373056	2.14143721	0	2.039164572	0.908822554	40.28321433	38.92723181	BAALC
ENSG00000237976	1.430297964	0.016182334	0.034046842	7.495030235	4.987318458	8.156658288	19.9940962	14.96233675	20.34832572	AL391069.3
ENSG00000227076	-1.250376755	0.016333158	0.034322507	19.27293489	21.94420121	32.62663315	6.36175788	11.50948981	13.27064721	AL158166.1
ENSG00000110195	1.108662443	0.01634379	0.034336918	23.55580931	4.987318458	25.48955715	33.62643451	39.13226535	43.35078088	FOLR1
ENSG00000167157	-1.268461785	0.016358279	0.034363378	22.4850907	21.94420121	22.43081029	8.179402989	6.905693885	12.38593739	PRRX2
ENSG00000272692	1.110028388	0.016400539	0.034440182	9.636467445	13.96449168	17.33289886	24.53820897	37.98131637	26.54129442	AC010997.4
ENSG00000175928	4.584715335	0.016492602	0.034621482	1.070718605	6.982245841	0	3.635290217	100.1325613	90.24040102	LRRN1
ENSG00000152192	5.325353088	0.016590619	0.034790991	3.212155815	1.994927383	1.019582286	0	136.9629287	112.3581464	POU4F1
ENSG00000278467	1.3325392	0.016641947	0.034890557	6.42431163	12.96702799	7.137076002	23.62938641	28.77372452	15.04006684	AC138393.3
ENSG00000153902	1.524758323	0.016687705	0.034970316	5.353593025	7.979709533	6.117493716	9.088225544	19.56613267	27.42600423	LGI4
ENSG00000271427	1.55406838	0.016699156	0.03499027	4.28287442	3.989854766	9.176240574	19.9940962	11.50948981	19.46361591	AL358072.1
ENSG00000279253	-1.22329424	0.016763492	0.035112903	22.4850907	18.95181014	44.86162058	13.63233832	6.905693885	15.92477665	AL121753.2
ENSG00000270133	1.356243579	0.01693247	0.035430012	6.42431163	9.974636916	8.156658288	23.62938641	26.47182656	13.27064721	AC025766.1
ENSG00000270757	-1.389755067	0.016960797	0.03546692	22.4850907	15.95941907	21.41122801	6.36175788	4.603795923	11.50122758	HSPE1-MOB4
ENSG00000279368	1.119212307	0.016997582	0.03552526	16.06077907	9.974636916	12.23498743	29.08232174	31.07562248	23.00245516	AL031123.3
ENSG00000276529	-1.058146282	0.017106629	0.035724347	26.76796512	33.91376551	36.7049623	22.72056386	10.35854083	13.27064721	AP001505.1
ENSG00000260552	1.092707253	0.017117406	0.035739326	16.06077907	12.96702799	15.29373429	21.8117413	46.03795923	27.42600423	AC023043.1
ENSG00000250318	1.426317482	0.01727319	0.036030686	2.14143721	17.95434645	6.117493716	24.53820897	25.32087758	21.23303553	AC003072.1
ENSG00000115474	1.191941184	0.01742543	0.036314829	7.495030235	20.94673752	8.156658288	31.8087894	26.47182656	25.6565846	KCNJ13
ENSG00000114757	1.053404609	0.017516231	0.036483094	9.636467445	18.95181014	17.33289886	25.44703152	36.83036738	33.61897293	PEX5L
ENSG00000183682	-1.386972934	0.017524646	0.036492237	21.4143721	15.95941907	18.35248115	8.179402989	6.905693885	6.192968697	BMP8A
ENSG00000264801	1.390509078	0.017534149	0.036507834	8.56574884	7.979709533	5.09791143	19.08527364	21.86803063	15.92477665	ERVFRD-3
ENSG00000253438	1.643837904	0.017660206	0.036719701	8.56574884	5.984782149	1.019582286	18.17645109	16.11328573	14.15535702	PCAT1
ENSG00000260220	1.054952554	0.017782539	0.036952874	13.91934186	12.96702799	16.31331658	36.35290217	27.62277554	25.6565846	CCDC187
ENSG00000231443	1.397249972	0.017922468	0.037230011	4.28287442	4.987318458	14.274152	19.9940962	21.86803063	20.34832572	AC124944.2
ENSG00000259723	1.243677641	0.018004158	0.037374859	9.636467445	6.982245841	15.29373429	16.35880598	26.47182656	32.73426311	AL354993.2
ENSG00000223685	1.10488197	0.018123967	0.037589145	9.636467445	18.95181014	11.21540515	25.44703152	27.62277554	32.73426311	LINC00571
ENSG00000269481	1.737002118	0.018593263	0.038456899	3.212155815	8.977173224	2.039164572	19.9940962	6.905693885	20.34832572	AC010319.4
ENSG00000157005	7.200564885	0.018704291	0.03866449	1.070718605	1.994927383	0	0	246.3030819	205.2526768	SST
ENSG00000015285	1.201394632	0.018902008	0.039019821	11.77790465	6.982245841	17.33289886	36.35290217	29.9246735	16.80948646	WAS
ENSG00000241527	1.375583972	0.019215876	0.039618134	8.56574884	16.95688276	3.058746858	27.26467663	33.37752044	14.15535702	CA15P1
ENSG00000164619	5.109124396	0.01941232	0.039982236	2.14143721	0	0	0.908822554	39.13226535	32.73426311	BMPER
ENSG00000258559	1.047307388	0.019515961	0.040182004	11.77790465	29.92391075	10.19582286	38.17054728	36.83036738	32.73426311	AC005519.1
ENSG00000175175	1.044192527	0.0195184	0.040182464	29.98012094	18.95181014	14.274152	20.90291875	66.75504089	43.35078088	PPM1E
ENSG00000119508	-1.193274643	0.019648752	0.040409529	29.98012094	18.95181014	27.52872172	8.179402989	8.056642865	16.80948646	NR4A3
ENSG00000214376	1.176045423	0.019815328	0.040729013	9.636467445	9.974636916	11.21540515	24.53820897	23.01897962	22.11774535	VSTM5
ENSG00000204335	1.460713492	0.019826698	0.040743145	4.28287442	6.982245841	9.176240574	9.997048098	26.47182656	20.34832572	SP5
ENSG00000242600	1.526203241	0.01990861	0.040892935	8.56574884	3.989854766	4.078329144	14.54116087	17.26423471	15.92477665	MBL1P
ENSG00000255585	1.504146353	0.019984303	0.041034466	14.99006047	4.987318458	2.039164572	28.17349918	14.96233675	18.57890609	AL590627.1
ENSG00000223401	1.569268316	0.020046612	0.041143771	4.28287442	1.994927383	13.25456972	17.26762853	28.77372452	12.38593739	NA
ENSG00000226352	1.148183189	0.020450826	0.041911711	23.55580931	11.9695643	7.137076002	21.8117413	43.73606127	29.19542386	PSPC1-AS2
ENSG00000259298	1.154770552	0.020632171	0.042230856	12.84862326	11.9695643	8.156658288	23.62938641	28.77372452	21.23303553	AC012170.2
ENSG00000188981	1.485770917	0.020675767	0.042310538	6.42431163	4.987318458	7.137076002	10.90587065	26.47182656	15.04006684	MSANTD1
ENSG00000185532	1.767470433	0.020745222	0.042443091	22.4850907	25.93405598	32.62663315	22.72056386	151.9252655	101.7416286	PRKG1
ENSG00000274333	1.165960173	0.020763083	0.04247484	12.84862326	8.977173224	11.21540515	29.99114429	26.47182656	17.69419628	CU633967.1
ENSG00000157343	1.412365222	0.020802476	0.042545827	10.70718605	4.987318458	5.09791143	18.17645109	23.01897962	14.15535702	ARMC12
ENSG00000187601	1.051717723	0.020819117	0.04257506	7.495030235	20.94673752	21.41122801	24.53820897	36.83036738	42.46607107	MAGEH1
ENSG00000271930	1.128999924	0.020918167	0.042743872	14.99006047	10.97210061	12.23498743	18.17645109	40.28321433	25.6565846	AC016877.3
ENSG00000224715	-1.108183386	0.02093859	0.042780783	36.40443257	21.94420121	24.46997486	11.81469321	17.26423471	9.731807953	Z82186.1
ENSG00000157851	6.873753942	0.020998749	0.042879539	1.070718605	1.994927383	0	0	214.0765104	145.9771193	DPYSL5
ENSG00000184925	1.022476276	0.021088635	0.043043698	12.84862326	14.96195537	19.37206343	28.17349918	43.73606127	24.77187479	LCN12
ENSG00000171033	1.193689516	0.021316861	0.043460607	50.32377443	36.90615659	55.05744344	49.98524049	164.5857043	111.4734366	PKIA
ENSG00000237870	-1.140783541	0.021443394	0.043698928	23.55580931	18.95181014	50.9791143	11.81469321	19.56613267	11.50122758	AC073130.1
ENSG00000111728	2.272166193	0.021767032	0.044278841	9.636467445	12.96702799	4.078329144	7.270580435	67.90598987	53.96729865	ST8SIA1
ENSG00000243635	1.092863727	0.02179611	0.044328048	19.27293489	12.96702799	11.21540515	17.26762853	40.28321433	35.38839256	AC091804.1
ENSG00000164076	4.397246189	0.021911046	0.04452684	3.212155815	2.992391075	0	0.908822554	71.35883681	58.39084772	CAMKV
ENSG00000226539	-1.142075992	0.022047878	0.044789848	29.98012094	18.95181014	43.8420383	22.72056386	9.207591846	9.731807953	AC012512.1
ENSG00000228204	-1.201156951	0.022093909	0.044868279	31.05083954	30.92137444	18.35248115	5.452935326	19.56613267	10.61651777	AC004830.1
ENSG00000182759	1.305263753	0.022178857	0.045030705	17.13149768	8.977173224	14.274152	7.270580435	49.49080617	43.35078088	MAFA
ENSG00000105499	1.085287605	0.022254544	0.045138887	8.56574884	15.95941907	13.25456972	23.62938641	27.62277554	29.19542386	PLA2G4C
ENSG00000170390	1.528913524	0.022335932	0.04527358	8.56574884	4.987318458	7.137076002	5.452935326	24.1699286	30.08013367	DCLK2
ENSG00000140285	1.428803209	0.023002816	0.04647466	7.495030235	4.987318458	6.117493716	13.63233832	14.96233675	21.23303553	FGF7
ENSG00000154479	1.008478235	0.023026355	0.046511851	11.77790465	17.95434645	34.66579772	24.53820897	46.03795923	59.27555753	CCDC173
ENSG00000067840	2.304418466	0.023455785	0.047307432	9.636467445	6.982245841	6.117493716	4.544112772	61.00029598	46.88962014	PDZD4
ENSG00000138400	1.46926342	0.023780164	0.047879825	8.56574884	7.979709533	3.058746858	9.088225544	24.1699286	21.23303553	MDH1B
ENSG00000267742	-1.184717918	0.023784576	0.047883393	16.06077907	29.92391075	27.52872172	12.72351576	13.81138777	6.192968697	FAM60CP
ENSG00000233435	1.111721759	0.023944487	0.048157207	23.55580931	6.982245841	10.19582286	29.99114429	31.07562248	26.54129442	AGGF1P2
ENSG00000261353	1.195554422	0.024114951	0.04846242	6.42431163	9.974636916	13.25456972	19.9940962	19.56613267	28.31071405	NA
ENSG00000262558	1.096273468	0.024285509	0.048761946	13.91934186	12.96702799	12.23498743	18.17645109	41.43416331	24.77187479	AC129507.3
ENSG00000122733	1.681261571	0.024396847	0.048947558	7.495030235	1.994927383	5.09791143	5.452935326	21.86803063	19.46361591	PHF24
ENSG00000142549	2.787799794	0.024404271	0.048951621	1.070718605	10.97210061	2.039164572	6.36175788	47.18890821	44.2354907	IGLON5
ENSG00000214290	1.106789293	0.024457162	0.049041436	13.91934186	8.977173224	11.21540515	23.62938641	23.01897962	26.54129442	COLCA2
ENSG00000118971	2.118495479	0.024562729	0.049231344	31.05083954	13.96449168	5.09791143	21.8117413	111.6420511	84.04743232	CCND2
ENSG00000204869	1.333073929	0.02458032	0.049255712	5.353593025	5.984782149	11.21540515	19.9940962	23.01897962	14.15535702	IGFL4
ENSG00000224713	1.07444703	0.024662146	0.049386935	17.13149768	6.982245841	15.29373429	27.26467663	29.9246735	25.6565846	AC025165.1
ENSG00000178803	1.490339088	0.02493106	0.049868945	3.212155815	7.979709533	5.09791143	16.35880598	12.66043879	16.80948646	ADORA2A-AS1
ENSG00000275582	1.06387029	0.024984056	0.049959847	12.84862326	24.93659229	9.176240574	25.44703152	47.18890821	26.54129442	AL031670.1
